# Supplementary material for: The use of multicomponent reactions in the development of bis-boronic acids for the detection of β-sialic acid
Source: Royal Society of Chemistry journal article supplement (doi:10.1039/d3ob01877f), 2023-12-27
Supplement: d3ob01877f1.pdf [file d3ob01877f1.pdf]

## Supplementary Information

### The Use of Multicomponent Reactions in the Development of Bisboronic Acids for the Detection of $\beta$ -Sialic Acid

Tzu-Ching Chou, Ying-Li Hu, Guan-Cheng Xie, Jyh-Chiang Jiang, Liang-Ying Peng, Hsiao-Chun Tsai, Chiao-Tien Yao, Yi-Jie Tsai, Ting-Yu Huang, Jing-Wen Hu, Yi-Ching Chen, Min-Yeh Tsai, Yi-Wei Chen, and Po-Shen Pan\*

## Table of Content

|           |                                                                                                                          |           |
|-----------|--------------------------------------------------------------------------------------------------------------------------|-----------|
| <b>1</b>  | <b>Synthetic section</b> .....                                                                                           | <b>1</b>  |
| 1.1       | General information .....                                                                                                | 1         |
| 1.2       | Starting Materials .....                                                                                                 | 2         |
| 1.3.      | Experimental procedure of products a1-a5, b1-b3, c1, d1-d3 and e1-e2.....                                                | 3         |
| 1.4.      | Experimental procedure of products A1-A5, B1-B3, C1, D1-D2 and E1-E2 .....                                               | 11        |
| <b>2</b>  | <b>Analysis section</b> .....                                                                                            | <b>19</b> |
| 2.1       | Materials of various boronic acid analogs investigated .....                                                             | 19        |
| 2.2       | Measurements and Calculations of Binding Constant.....                                                                   | 20        |
| 2.3       | DFT calculations .....                                                                                                   | 20        |
| <b>3</b>  | <b>Supplementary Tables and Figures</b> .....                                                                            | <b>22</b> |
| 3.1       | Copies of <sup>1</sup> H NMR, <sup>13</sup> C NMR, <sup>11</sup> B NMR and Mass spectra .....                            | 22        |
| 3.2       | $K_{ARS}$ and $K_{eq}$ (Sialic acid) titration curve at pH 6.0 and pH 6.5 . .....                                        | 74        |
| 3.3       | $K_{ARS}$ and $K_{eq}$ (Sialic acid, Fructose, and Galactose) titration curve at pH 6.0, pH 6.5, pH 7.0, and pH 7.5..... | 81        |
| <b>4.</b> | <b>Computational details</b> .....                                                                                       | <b>86</b> |
| 4.1       | Reaction energy .....                                                                                                    | 86        |
| 4.2       | Coordinate files .....                                                                                                   | 86        |

# 1 Synthetic section

## 1.1 General information

Unless stated otherwise, all solvents and materials utilized were obtained from Sigma-Aldrich, TCI, Acros, Alfa Aesar, and AK Scientific and were employed without additional purification. As described in the literature, the isocyanides were synthesized following established procedures from aldehydes. The reactions were conducted in sealed vessels using the CEM Discover Benchmate™ microwave reactor. An external IR sensor was employed to monitor the temperatures during microwave-assisted reactions. Merck precoated silica gel 60 F254 plates (KGaA, Darmstadt, Germany) were used for thin-layer chromatography, while column chromatography was carried out using SiliaFlash® P60 silica gel with a particle size of 40-63µm (230-400 mesh).

Nuclear magnetic resonance (NMR) spectra were obtained on a Bruker Avance 600 MHz spectrometer, with 600 MHz, 150 MHz, and 192.5 MHz frequencies for <sup>1</sup>H, <sup>13</sup>C, and <sup>11</sup>B, respectively. In <sup>1</sup>H NMR, chemical shifts were referenced to the internal solvent peak (CDCl<sub>3</sub> δ 7.26 ppm or CD<sub>3</sub>OD δ 3.31 ppm), and coupling constants were reported in hertz (Hz). The spin multiplicities were denoted: s = singlet, d = doublet, t = triplet, m = multiplet, and br = broad. For <sup>13</sup>C NMR, chemical shifts were referenced to the internal solvent peak (CDCl<sub>3</sub> δ 77.16 ppm or CD<sub>3</sub>OD δ 49.00 ppm). Chemical shifts for <sup>11</sup>B NMR were referenced to external standards (BF<sub>3</sub>·OEt<sub>2</sub> δ 0.00 ppm). High-resolution mass spectra (HRMS) were acquired using a MICROMASS® Q-ToF PREMIER™ (Waters, ESI pos. mode) and Bruker Autoflex™ Speed Maldi-TOF/TOF instrument.

## 1.2 Starting Materials

### Carboxylic acids

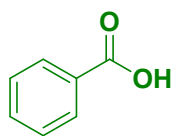

K1

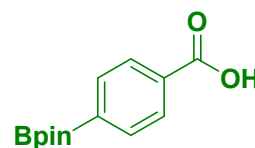

K2

---

### Amines

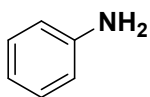

L1

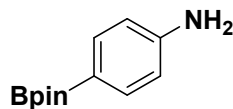

L2

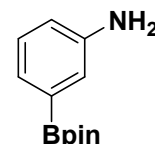

L2

---

### Aldehydes

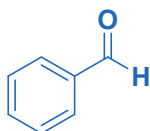

M1

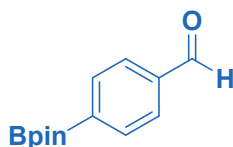

M2

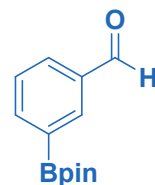

M3

---

### Isocyanides

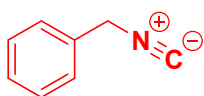

N1

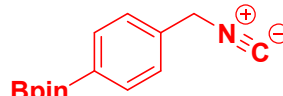

N2

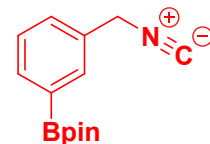

N3

Except for isocyanide **N1** and **N2** and **N3**, all starting carboxylic acids, amines, and aldehydes used in the study were commercially available. As described in the literature, isocyanide **N1**, **N2** and **N3** were synthesized following established procedures from aldehydes.

# Experimental procedure of products a1-a5, b1-b3, c1, d1-d3 and e1-e2

General procedure for synthesis of mono-boronate ester and bis-boronate ester analogues of five series.

In a 10 mL glass tube equipped with a magnetic stir bar, amine **L** (1.0 mmol, 1.0 equiv), aldehyde **M** (1.0 mmol, 1.0 equiv), and 2,2,2-trifluoroethanol (1.0 mL) were initially stirred. The mixture was subjected to microwave irradiation for 15 minutes at 60 °C and 150 W, while being vigorously stirred. Following this, carboxylic acid **K** (1.2 mmol, 1.2 equiv) and isocyanide **N** (1.0 mmol, 1.0 equiv) were added. The reaction mixture was further exposed to microwave irradiation for 120 minutes at 65 °C and 150 W, under high-speed magnetic stirring. Once the reaction was complete, the crude material was concentrated and dissolved in dichloromethane. The resulting organic solution was then extracted with 1 M HCl<sub>(aq)</sub>. Addition of a saturated aqueous solution of NaHCO<sub>3(aq)</sub> along with brine followed. The organic layer was subsequently dried using anhydrous MgSO<sub>4</sub> and concentrated under vacuum. The resulting residue was purified through silica gel flash column chromatography, using ethyl acetate/n-hexane (3/7) eluent initially, and acetone/methanol (13/1) eluent thereafter, to yield the desired products of a to e series in yields ranging from 31% to 75%

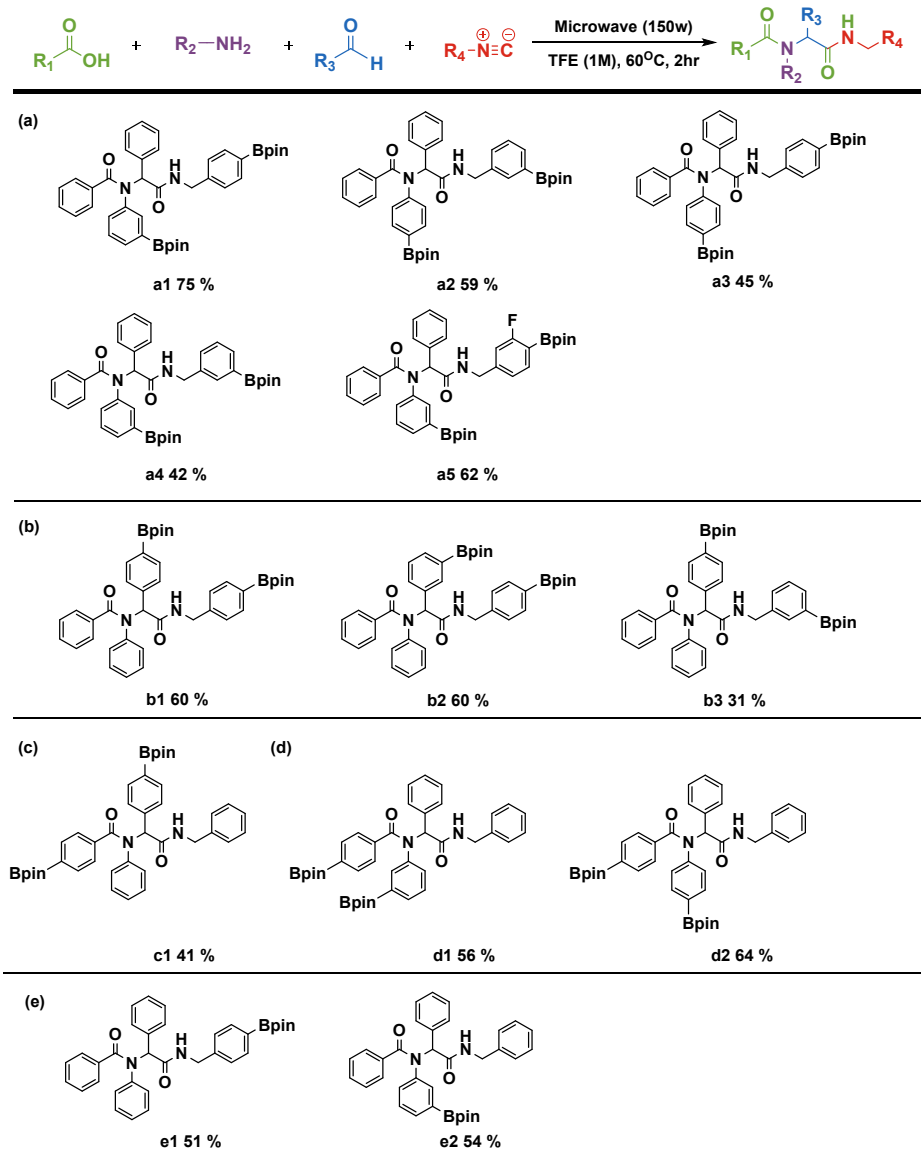

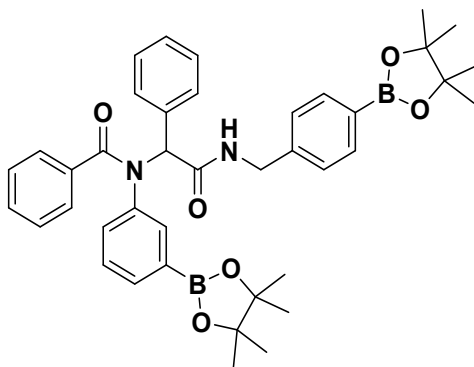

**a1**

**N-(2-oxo-1-phenyl-2-((4-(4,4,5,5-tetramethyl-1,3,2-dioxaborolan-2-yl)benzyl)amino)ethyl)-N-(3-(4,4,5,5-tetramethyl-1,3,2-dioxaborolan-2-yl)phenyl)benzamide**

$^1\text{H}$  NMR (600 MHz,  $\text{CDCl}_3$ )  $\delta$  7.73 (d,  $J = 7.8$  Hz, 1H), 7.46 (br, 1H), 7.45-7.29 (m, 4H), 7.25 (d,  $J = 8.4$  Hz, 2H), 7.22 (t,  $J = 3$  Hz, 3H), 7.16 (t,  $J = 7.2$  Hz, 1H), 7.10 (t,  $J = 7.5$  Hz, 3H), 7.02 (t,  $J = 7.8$  Hz, 1H), 6.50 (s, 1H), 6.09 (s, 1H), 4.55 (dd,  $J = 15, 6$  Hz, 2H), 1.32 (s, 12H), 1.27 (d,  $J = 6.6$  Hz, 12H).  $^{13}\text{C}$  NMR (150 MHz,  $\text{CDCl}_3$ )  $\delta$  171.29, 169.53, 141.27, 141.15, 135.77, 135.56, 135.04, 123.61, 133.33, 132.99, 129.90, 129.42, 128.69, 128.46, 128.39, 127.91, 127.53, 126.77, 83.76, 83.67, 67.83, 43.71, 24.78, 24.60.  $^{11}\text{B}$  NMR (192.5 MHz,  $\text{CDCl}_3$ )  $\delta$  31.53. HRMS (ESI, positive ion)( $m/z$ ):  $[\text{M} + \text{Na}]^+$ , calcd for  $\text{C}_{40}\text{H}_{46}\text{B}_2\text{N}_2\text{O}_6\text{Na}$ , 695.34342; found 695.34273.

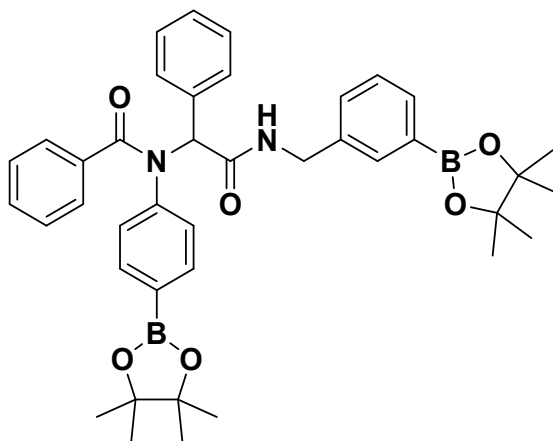

**a2**

**N-(2-oxo-1-phenyl-2-((3-(4,4,5,5-tetramethyl-1,3,2-dioxaborolan-2-yl)benzyl)amino)ethyl)-N-(4-(4,4,5,5-tetramethyl-1,3,2-dioxaborolan-2-yl)phenyl)benzamide**

$^1\text{H}$  NMR (600 MHz,  $\text{CDCl}_3$ )  $\delta$  7.68 (t,  $J = 6.9$  Hz, 2H), 7.45 (d,  $J = 6.6$  Hz, 2H), 7.40 (d,  $J = 7.8$  Hz, 1H), 7.20 (d,  $J = 7.8$  Hz, 3H), 7.29 (t,  $J = 3.6$  Hz, 1H), 7.28 (d,  $J = 6$  Hz, 1H), 7.22 (t,  $J = 3$  Hz, 3H), 7.18 (t,  $J = 7.2$  Hz, 1H), 7.11 (t,  $J = 7.5$  Hz, 2H), 6.99 (d,  $J = 7.8$  Hz, 2H), 6.32 (t,  $J = 5.4$  Hz, 1H), 6.19 (s, 1H), 4.50 (d,  $J = 6$  Hz, 2H), 1.32 (s, 12H), 1.29 (s, 12H).  $^{13}\text{C}$  NMR (150 MHz,  $\text{CDCl}_3$ )  $\delta$  171.18, 69.33, 144.11, 137.25, 135.75, 134.93, 134.44, 133.88, 133.77, 130.62, 129.98, 129.56, 129.15, 128.59, 128.45, 128.12, 127.63, 83.83, 83.78, 67.15, 43.74, 24.80, 24.77.  $^{11}\text{B}$  NMR (192.5 MHz,  $\text{CDCl}_3$ )  $\delta$  31.36. HRMS (ESI, positive ion)( $m/z$ ):  $[\text{M} + \text{Na}]^+$ , calcd for  $\text{C}_{40}\text{H}_{46}\text{B}_2\text{N}_2\text{O}_6\text{Na}$ , 695.34342; found 695.34323.

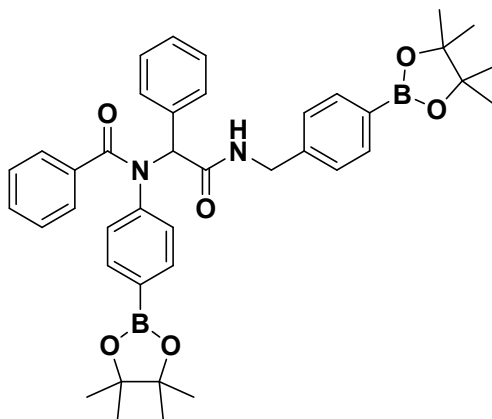

**a3**

**N-(2-oxo-1-phenyl-2-((4-(4,4,5,5-tetramethyl-1,3,2-dioxaborolan-2-yl)benzyl)amino)ethyl)-N-(4-(4,4,5,5-tetramethyl-1,3,2-dioxaborolan-2-yl)phenyl)benzamide**

$^1\text{H}$  NMR (600 MHz,  $\text{CDCl}_3$ )  $\delta$  7.73 (d,  $J = 7.8$  Hz, 2H), 7.46 (d,  $J = 8.4$  Hz, 2H), 7.32 (s, 1H), 7.31 (d,  $J = 1.2$  Hz, 1H), 7.28 (q,  $J = 3.6$  Hz, 2H), 7.25 (d,  $J = 7.8$  Hz, 2H), 7.23 (q,  $J = 3$  Hz, 3H), 7.18 (t,  $J = 7.2$  Hz, 1H), 7.11 (q,  $J = 7.2$  Hz, 2H), 6.99 (d,  $J = 7.8$  Hz, 2H), 6.33 (br, 1H), 6.15 (s, 1H), 4.54 (qd,  $J = 15.6, 6$  Hz, 2H), 1.33 (s, 12H), 1.28 (s, 12H).  $^{13}\text{C}$  NMR (150 MHz,  $\text{CDCl}_3$ )  $\delta$  171.16, 169.40, 144.21, 141.19, 135.74, 135.07, 134.96, 134.47, 129.95, 129.60, 129.12, 128.62, 128.53, 127.66, 126.84, 83.85, 67.35, 43.79, 24.80.  $^{11}\text{B}$  NMR (192.5 MHz,  $\text{CDCl}_3$ )  $\delta$  31.19. HRMS (ESI, positive ion)( $m/z$ ):  $[\text{M} + \text{Na}]^+$ , calcd for  $\text{C}_{40}\text{H}_{46}\text{B}_2\text{N}_2\text{O}_6\text{Na}$ , 695.34342; found 695.34335.

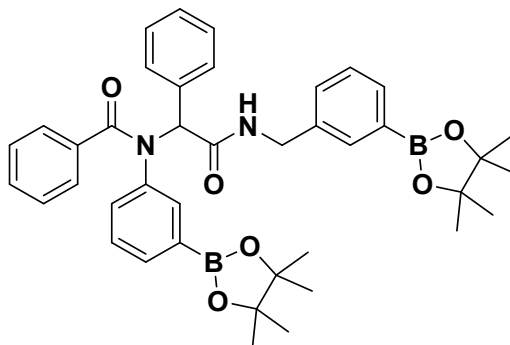

**a4**

**N-(2-oxo-1-phenyl-2-((3-(4,4,5,5-tetramethyl-1,3,2-dioxaborolan-2-yl)benzyl)amino)ethyl)-N-(3-(4,4,5,5-tetramethyl-1,3,2-dioxaborolan-2-yl)phenyl)benzamide**

$^1\text{H}$  NMR (600 MHz,  $\text{CDCl}_3$ )  $\delta$  7.68 (d,  $J = 10.2$  Hz, 2H), 7.43 (dd,  $J = 21.9, 7.2$  Hz, 2H), 7.31 (dd,  $J = 18, 7.8$  Hz, 4H), 7.21 (d,  $J = 6.6$  Hz, 2H), 7.15 (t,  $J = 7.2$  Hz, 2H), 7.10 (t,  $J = 7.5$  Hz, 2H), 7.02 (t,  $J = 7.5$  Hz, 1H), 6.60 (br, 1H), 6.15 (s, 1H), 4.57-4.50 (m, 2H), 1.32 (s, 12H), 1.27 (d,  $J = 6.6$  Hz, 12H).  $^{13}\text{C}$  NMR (150 MHz,  $\text{CDCl}_3$ )  $\delta$  171.31, 169.58, 141.06, 137.47, 135.92, 135.81, 134.69, 133.89, 133.73, 133.32, 133.23, 130.61, 130.05, 129.42, 128.73, 128.48, 128.36, 128.13, 127.91, 127.57, 83.77, 67.56, 43.67, 43.54, 24.86, 24.65.  $^{11}\text{B}$  NMR (192.5 MHz,  $\text{CDCl}_3$ )  $\delta$  31.34. HRMS (ESI, positive ion)( $m/z$ ):  $[\text{M} + \text{Na}]^+$ , calcd for  $\text{C}_{40}\text{H}_{46}\text{B}_2\text{N}_2\text{O}_6\text{Na}$ , 695.34342; found 695.34356.

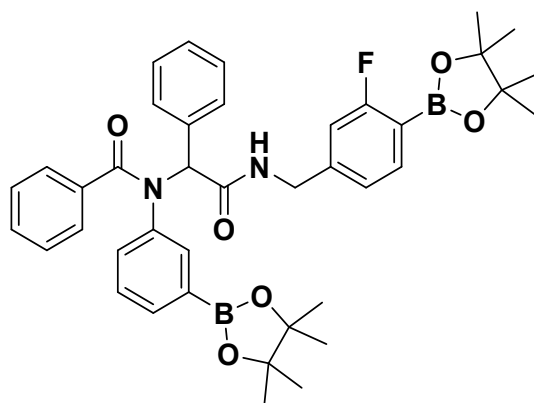

**a5**

**N-(2-((3-fluoro-4-(4,4,5,5-tetramethyl-1,3,2-dioxaborolan-2-yl)benzyl)amino)-2-oxo-1-phenylethyl)-N-(3-(4,4,5,5-tetramethyl-1,3,2-dioxaborolan-2-yl)phenyl)benzamide**

$^1\text{H}$  NMR (600 MHz,  $\text{CDCl}_3$ )  $\delta$  7.66 (t,  $J = 6.9$  Hz, 1H), 7.46 (d,  $J = 7.2$  Hz, 1H), 7.39-7.30 (m, 5H), 7.24 (t,  $J = 2.7$  Hz, 3H), 7.17 (t,  $J = 7.2$  Hz, 1H), 7.10 (q,  $J = 7.2$  Hz, 3H), 7.03 (q,  $J = 7.2$  Hz, 2H), 6.92 (d,  $J = 10.2$  Hz, 1H), 6.54 (br, 1H), 6.05 (s, 1H), 4.53 (qd,  $J = 15.6, 6.6$  Hz, 2H),  $\delta$  1.34 (s, 12H),  $\delta$  1.27 (d,  $J = 5.0$  Hz, 12H).  $^{13}\text{C}$  NMR (150 MHz,  $\text{CDCl}_3$ )  $\delta$  171.35, 169.73, 168.19, 166.52, 144.44, 144.38, 141.24, 137.14, 137.08, 135.68, 135.44, 134.53, 133.41, 132.94, 129.83, 129.54, 128.76, 128.58, 128.51, 128.01, 127.60, 122.50, 114.16, 114.00, 83.81, 68.07, 43.14, 24.85, 24.77, 24.63.  $^{11}\text{B}$  NMR (192.5 MHz,  $\text{CDCl}_3$ )  $\delta$  30.67. HRMS (ESI, positive ion)( $m/z$ ):  $[\text{M} + \text{Na}]^+$ , calcd for  $\text{C}_{40}\text{H}_{45}\text{B}_2\text{N}_2\text{O}_6\text{FNa}$ , 713.33400; found 713.33398.

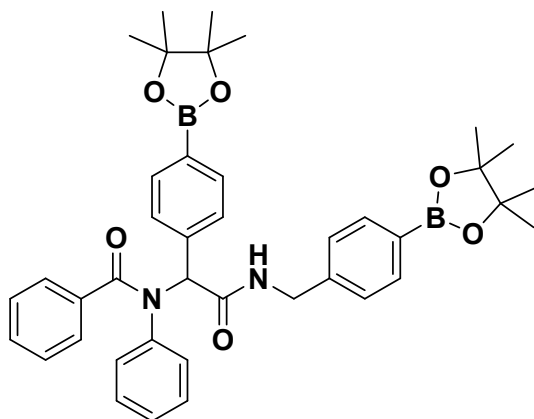

**b1**

**N-(2-oxo-2-((4-(4,4,5,5-tetramethyl-1,3,2-dioxaborolan-2-yl)benzyl)amino)-1-(4-(4,4,5,5-tetramethyl-1,3,2-dioxaborolan-2-yl)phenyl)ethyl)-N-phenylbenzamide**

$^1\text{H}$  NMR (600 MHz,  $\text{CDCl}_3$ )  $\delta$  7.75 (d,  $J = 7.8$  Hz, 2H), 7.69 (d,  $J = 7.8$  Hz, 2H), 7.32 (q,  $J = 3.6$  Hz, 4H), 7.28 (s, 2H), 7.20 (t,  $J = 7.2$  Hz, 1H), 7.13 (t,  $J = 7.5$  Hz, 2H), 7.03 (s, 3H), 7.01 (br, 2H), 6.26 (br, 1H), 6.17 (s, 1H), 4.56 (qd,  $J = 15, 6$  Hz, 2H), 1.35 (s, 12H), 1.34 (s, 12H).  $^{13}\text{C}$  NMR (150 MHz,  $\text{CDCl}_3$ )  $\delta$  171.24, 169.34, 141.12, 137.51, 135.12, 134.96, 129.98, 129.50, 129.28, 128.57, 128.54, 127.58, 127.19, 126.88, 83.92, 93.74, 67.34, 43.86, 24.83.  $^{11}\text{B}$  NMR (192.5 MHz,  $\text{CDCl}_3$ )  $\delta$  31.37. HRMS (ESI, positive ion)( $m/z$ ):  $[\text{M} + \text{Na}]^+$ , calcd for  $\text{C}_{40}\text{H}_{46}\text{B}_2\text{N}_2\text{O}_6\text{Na}$ , 695.34342; found 695.34380.



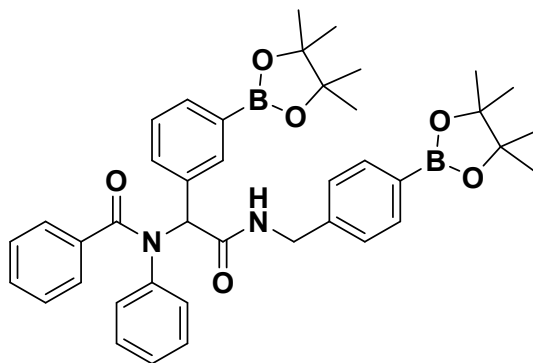

**b2**

**N-(2-oxo-2-((4-(4,4,5,5-tetramethyl-1,3,2-dioxaborolan-2-yl)benzyl)amino)-1-(3-(4,4,5,5-tetramethyl-1,3,2-dioxaborolan-2-yl)phenyl)ethyl)-N-phenylbenzamide**

$^1\text{H}$  NMR (600 MHz,  $\text{CDCl}_3$ )  $\delta$  7.72 (d,  $J = 4.8$  Hz, 2H), 7.71 (s, 1H), 7.66 (d,  $J = 7.2$  Hz, 2H), 7.29 (t,  $J = 9$  Hz, 3H), 7.23 (d,  $J = 8.4$  Hz, 2H), 7.17 (q,  $J = 8.4$  Hz, 2H), 7.10 (t,  $J = 7.5$  Hz, 2H), 6.98 (s, 5H), 6.29 (t,  $J = 5.7$  Hz, 1H), 6.26 (s, 1H), 4.53 (qd,  $J = 15, 5.4$  Hz, 2H), 1.32 (s, 12H), 1.3 (s, 12H).  $^{13}\text{C}$  NMR (150 MHz,  $\text{CDCl}_3$ )  $\delta$  171.22, 169.68, 141.28, 141.09, 136.86, 136.05, 135.10, 134.94, 133.81, 132.90, 130.54, 129.38, 128.54, 128.34, 127.88, 127.55, 127.14, 126.81, 83.93, 83.71, 66.65, 43.77, 24.96, 24.85, 24.76.  $^{11}\text{B}$  NMR (192.5 MHz,  $\text{CDCl}_3$ )  $\delta$  30.86. HRMS (ESI, positive ion)( $m/z$ ):  $[\text{M} + \text{Na}]^+$ , calcd for  $\text{C}_{40}\text{H}_{46}\text{B}_2\text{N}_2\text{O}_6\text{Na}$ , 695.34342; found 695.34538.

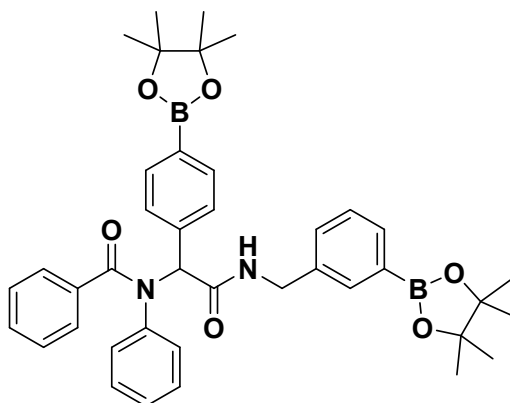

**b3**

**N-(2-oxo-2-((3-(4,4,5,5-tetramethyl-1,3,2-dioxaborolan-2-yl)benzyl)amino)-1-(4-(4,4,5,5-tetramethyl-1,3,2-dioxaborolan-2-yl)phenyl)ethyl)-N-phenylbenzamide**

$^1\text{H}$  NMR (600 MHz,  $\text{CDCl}_3$ )  $\delta$  7.67 (d,  $J = 7.8$  Hz, 4H), 7.39 (d,  $J = 7.8$  Hz, 1H), 7.30 (dd,  $J = 7.2, 1.8$  Hz, 5H), 7.17 (t,  $J = 7.2$  Hz, 1H), 7.10 (t,  $J = 7.5$  Hz, 2H), 7.00 (s, 5H), 6.313 (t,  $J = 5.7$  Hz, 1H), 6.20 (s, 1H), 4.53 (qd,  $J = 15, 6$  Hz, 2H), 1.33 (s, 12H), 1.31 (s, 12H).  $^{13}\text{C}$  NMR (150 MHz,  $\text{CDCl}_3$ )  $\delta$  171.22, 169.27, 141.38, 137.49, 137.21, 135.87, 134.90, 133.87, 133.77, 130.60, 130.01, 129.41, 129.30, 128.51, 128.44, 128.10, 127.52, 127.11, 83.83, 83.77, 67.08, 43.75, 24.80.  $^{11}\text{B}$  NMR (192.5 MHz,  $\text{CDCl}_3$ )  $\delta$  31.19. HRMS (ESI, positive ion)( $m/z$ ):  $[\text{M} + \text{Na}]^+$ , calcd for  $\text{C}_{40}\text{H}_{46}\text{B}_2\text{N}_2\text{O}_6\text{Na}$ , 695.34342; found 695.34407.

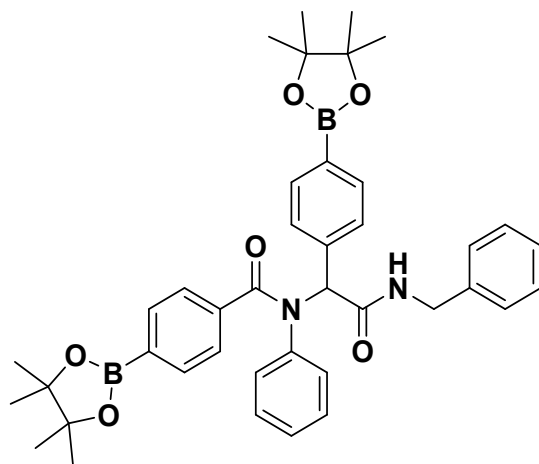

**c1**

**N-(2-(benzylamino)-2-oxo-1-(4-(4,4,5,5-tetramethyl-1,3,2-dioxaborolan-2-yl)phenyl)ethyl)-N-phenyl-4-(4,4,5,5-tetramethyl-1,3,2-dioxaborolan-2-yl)benzamide**

$^1\text{H}$  NMR (600 MHz,  $\text{CDCl}_3$ )  $\delta$  7.67 (d,  $J = 7.8$  Hz, 2H), 7.56 (d,  $J = 7.8$  Hz, 2H), 7.29 (d,  $J = 7.8$  Hz, 5H), 7.27 (s, 1H), 7.25-7.22 (m, 3H), 6.99 (s, 1H), 6.39 (br, 1H), 6.17 (s, 1H), 4.54-4.47 (m, 2H), 1.30 (d,  $J = 18.6$  Hz).  $^{13}\text{C}$  NMR (150 MHz,  $\text{CDCl}_3$ )  $\delta$  171.20, 169.33, 143.93, 138.28, 138.03, 135.00, 134.43, 134.02, 130.03, 129.17, 128.60, 128.55, 127.66, 127.60, 127.34, 83.88, 67.22, 43.81, 24.87, 24.82.  $^{11}\text{B}$  NMR (192.5 MHz,  $\text{CDCl}_3$ )  $\delta$  31.50. HRMS (ESI, positive ion)( $m/z$ ):  $[\text{M} + \text{Na}]^+$ , calcd for  $\text{C}_{40}\text{H}_{46}\text{B}_2\text{N}_2\text{O}_6\text{Na}$ , 695.34342; found 695.34451.

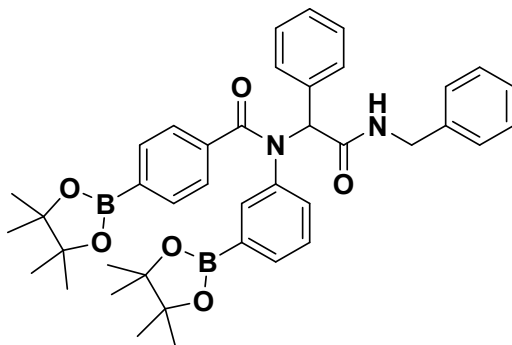

**d1**

**N-(2-(benzylamino)-2-oxo-1-phenylethyl)-4-(4,4,5,5-tetramethyl-1,3,2-dioxaborolan-2-yl)-N-(3-(4,4,5,5-tetramethyl-1,3,2-dioxaborolan-2-yl)phenyl)benzamide**

$^1\text{H}$  NMR (600 MHz,  $\text{CDCl}_3$ )  $\delta$  7.54 (d,  $J = 8.4$  Hz, 2H), 7.44 (d,  $J = 7.2$  Hz, 1H), 7.31 (s, 2H), 7.29 (dd,  $J = 10.5, 3.6$  Hz, 6H), 7.24-7.22 (m, 5H), 7.10 (br, 1H), 7.00 (t,  $J = 7.8$  Hz, 1H), 6.41 (br, 1H), 6.08 (s, 1H), 4.57-4.51 (m, 2H), 1.28 (d,  $J = 3$  Hz, 18H), 1.27 (s, 6H).  $^{13}\text{C}$  NMR (150 MHz,  $\text{CDCl}_3$ )  $\delta$  171.34, 169.47, 140.90, 138.38, 138.12, 135.68, 134.59, 133.95, 133.47, 133.13, 130.04, 129.97, 129.47, 128.71, 128.59, 128.50, 128.45, 128.01, 127.76, 127.58, 127.29, 83.86, 83.79, 67.71, 43.76, 24.87, 24.81, 24.63.  $^{11}\text{B}$  NMR (192.5 MHz,  $\text{CDCl}_3$ )  $\delta$  31.58. HRMS (ESI, positive ion)( $m/z$ ):  $[\text{M} + \text{Na}]^+$ , calcd for  $\text{C}_{40}\text{H}_{46}\text{B}_2\text{N}_2\text{O}_6\text{Na}$ , 695.34342; found 695.34522.

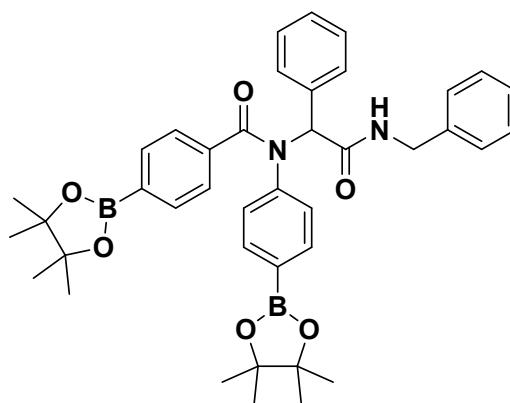

**d2**

**N-(2-(benzylamino)-2-oxo-1-phenylethyl)-4-(4,4,5,5-tetramethyl-1,3,2-dioxaborolan-2-yl)-N-(4-(4,4,5,5-tetramethyl-1,3,2-dioxaborolan-2-yl)phenyl)benzamide**

$^1\text{H}$  NMR (600 MHz,  $\text{CDCl}_3$ )  $\delta$  7.54 (d,  $J = 8.4$  Hz, 2H), 7.42 (d,  $J = 4.8$  Hz, 2H), 7.30-7.28 (m, 6H), 7.27 (s, 2H), 7.26-7.12 (m, 4H), 6.97 (d,  $J = 7.2$  Hz, 2H), 6.28 (br, 1H), 6.15 (s, 1H), 4.53 (d,  $J = 5.4$  Hz, 2H), 1.30 (d,  $J = 2.4$  Hz, 24H).  $^{13}\text{C}$  NMR (150 MHz,  $\text{CDCl}_3$ )  $\delta$  171.20, 169.33, 143.93, 138.28, 138.03, 135.00, 134.43, 134.02, 130.03, 129.17, 128.60, 128.56, 127.66, 127.60, 127.34, 83.89, 67.21, 43.81, 24.87, 24.82.  $^{11}\text{B}$  NMR (192.5 MHz,  $\text{CDCl}_3$ )  $\delta$  31.42. HRMS (ESI, positive ion)( $m/z$ ):  $[\text{M} + \text{Na}]^+$ , calcd for  $\text{C}_{40}\text{H}_{46}\text{B}_2\text{N}_2\text{O}_6\text{Na}$ , 695.34342; found 695.34518.

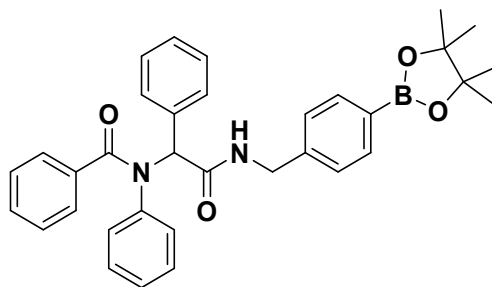

**e1**

**N-(2-oxo-1-phenyl-2-((4-(4,4,5,5-tetramethyl-1,3,2-dioxaborolan-2-yl)benzyl)amino)ethyl)-N-phenylbenzamide**

$^1\text{H}$  NMR (600 MHz,  $\text{CDCl}_3$ )  $\delta$  7.73 (d,  $J = 7.8$  Hz, 2H), 7.28 (d,  $J = 7.2$  Hz, 2H), 7.25-7.18 (m, 7H), 7.15 (dd,  $J = 6.6, 1.8$  Hz, 1H), 7.1 (td,  $J = 7.2, 1.2$  Hz, 1H), 7.0 (s, 1H), 6.70 (br, 1H), 6.25 (s, 1H), 4.50 (qd,  $J = 15, 6$  Hz, 2H), 1.33 (s, 12H).  $^{13}\text{C}$  NMR (150 MHz,  $\text{CDCl}_3$ )  $\delta$  171.11, 169.64, 141.26, 140.98, 135.78, 134.89, 134.38, 130.22, 130.04, 129.28, 128.96, 128.79, 128.71, 128.38, 128.28, 128.14, 127.95, 127.40, 127.18, 126.95, 126.63, 126.22, 115.49, 83.56, 83.44, 66.54, 43.50, 43.22, 24.69.  $^{11}\text{B}$  NMR (192.5 MHz,  $\text{CDCl}_3$ )  $\delta$  31.41. HRMS (ESI, positive ion)( $m/z$ ):  $[\text{M} + \text{Na}]^+$ , calcd for  $\text{C}_{34}\text{H}_{35}\text{BN}_2\text{O}_4\text{Na}$ , 569.25821; found 569.25839.

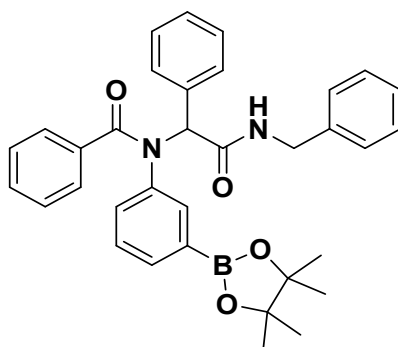

**e2**

**N-(2-(benzylamino)-2-oxo-1-phenylethyl)-N-(3-(4,4,5,5-tetramethyl-1,3,2-dioxaborolan-2-yl)phenyl)benzamide**

$^1\text{H}$  NMR (600 MHz,  $\text{CDCl}_3$ )  $\delta$  7.45 (d,  $J = 7.2$  Hz, 1H), 7.34 (br, 1H), 7.30 (d,  $J = 7.8$  Hz, 2H), 7.29-7.22 (m, 6H), 7.20 (d,  $J = 3$  Hz, 4H), 7.14 (dd,  $J = 6.6, 2.4$  Hz, 2H), 7.09 (t,  $J = 7.5$  Hz, 2H), 7.01 (t,  $J = 7.5$  Hz, 1H), 6.66 (br, 1H), 6.14 (d,  $J = 3$  Hz, 1H), 4.51 (d,  $J = 3.6$  Hz, 2H), 1.27 (d,  $J = 6.6$  Hz, 12H).  $^{13}\text{C}$  NMR (150 MHz,  $\text{CDCl}_3$ )  $\delta$  171.20, 169.52, 140.82, 138.10, 135.75, 134.54, 133.18, 133.03, 129.95, 129.25, 128.51, 128.37, 128.27, 128.23, 127.71, 127.40, 127.37, 127.14, 127.03, 83.62, 67.31, 43.50, 24.72, 24.49.  $^{11}\text{B}$  NMR (192.5 MHz,  $\text{CDCl}_3$ )  $\delta$  30.67. HRMS (ESI, positive ion)( $m/z$ ):  $[\text{M} + \text{Na}]^+$ , calcd for  $\text{C}_{34}\text{H}_{35}\text{BN}_2\text{O}_4\text{Na}$ , 569.25821; found 569.25894.

## 1.4. Experimental procedure of products A1-A5, B1-B3, C1, D1-D2 and E1-E2

### E2

General procedure for synthesis of Ugi boronic acid analogues **A1-A5**, **B1-B3**, **C1**, **D1-D2** and **E1-E2**.

Boronate ester compounds **a1-a5**, **b1-b3**, **c1**, **d1-d2** and **e1-e2** (0.5 mmol, 1.0 equiv), a stirring bar, diethanolamine (0.5 mmol, 1.0 equiv), and 5.00 mL of ether were added to the round-bottom flask. The reaction mixture was allowed to react at room temperature for at least 8 hours until solid precipitation occurred. The resulting solid was then filtered under vacuum, and the liquid was removed. The solid was redissolved in the original round-bottom flask, and the solvent was removed under reduced pressure. A stirring bar, 15.00 mL of 1 M HCl, and 5.00 mL of MeOH were added to the residue. The reaction mixture was allowed to react at room temperature for at least 8 hours. After completion of the reaction, the bottle opening was sealed with clean paper and secured with a rubber band. The bottle was then immersed in liquid nitrogen until the entire solution had frozen into a solid. Subsequently, the bottle was placed in a freeze dryer to remove HCl and MeOH. The resulting solid was then subjected to EA/HCl extraction, and the organic layer was treated with anhydrous magnesium sulfate to remove H<sub>2</sub>O, followed by filtration under a vacuum. The solvent was removed under reduced pressure by rotary evaporation. Finally, the product was subjected to freeze-drying. The desired products were obtained in yields ranging from 30% to 78%, as confirmed by <sup>1</sup>H NMR, <sup>11</sup>B NMR, and <sup>13</sup>C NMR spectroscopy.

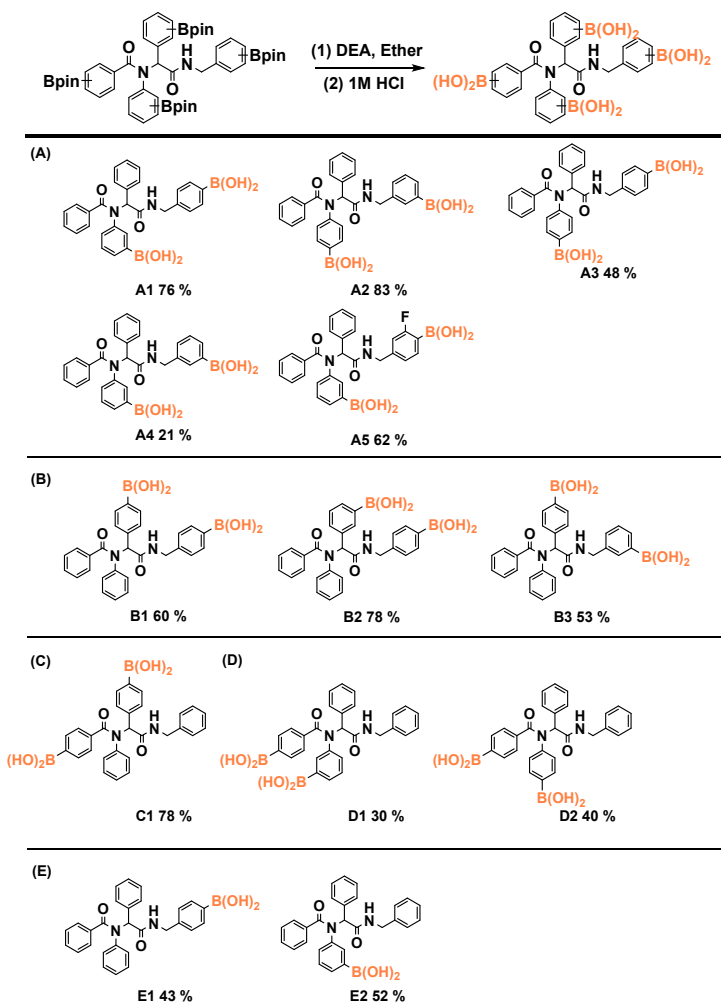

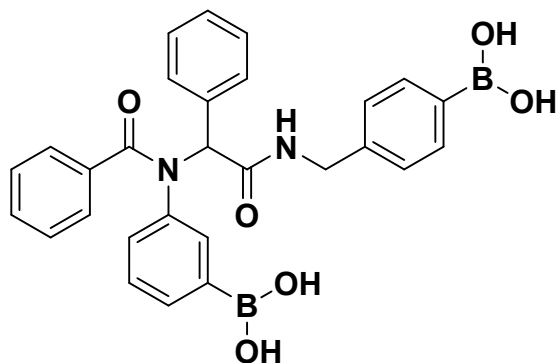

**A1**

**(3-(N-(2-((4-boronobenzyl)amino)-2-oxo-1-phenylethyl)benzamido)phenyl)boronic acid**

$^1\text{H}$  NMR (600 MHz,  $\text{CD}_3\text{OD}$ )  $\delta$  7.52 (br, 1H), 7.32 (br, 2H), 7.25 (s, 4H), 7.20-7.16 (m, 4H), 7.12 (q,  $J = 7.2$  Hz, 3H), 6.97 (br, 1H), 6.32 (s, 1H), 4.43 (q,  $J = 9.6$  Hz, 2H).  $^{13}\text{C}$  NMR (150 MHz,  $\text{CD}_3\text{OD}$ )  $\delta$  173.49, 172.27, 143.02, 139.71, 138.99, 135.49, 134.54, 134.05, 131.74, 131.32, 129.41, 129.36, 129.22, 128.68, 128.31, 128.20, 128.00, 67.18, 44.18.  $^{11}\text{B}$  NMR (192.5 MHz,  $\text{CD}_3\text{OD}$ )  $\delta$  28.98. HRMS (ESI, positive ion)( $m/z$ ):  $[\text{M} + \text{Na}]^+$ , calcd for  $\text{C}_{28}\text{H}_{26}\text{B}_2\text{N}_2\text{O}_6\text{Na}$ , 531.18692; found 531.18764.

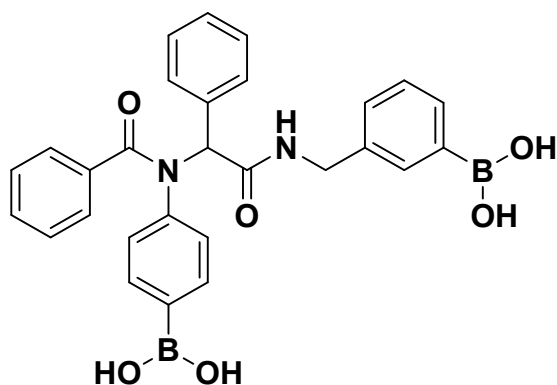

**A2**

**(4-(N-(2-((3-boronobenzyl)amino)-2-oxo-1-phenylethyl)benzamido)phenyl)boronic acid**

$^1\text{H}$  NMR (600 MHz,  $\text{CD}_3\text{OD}$ )  $\delta$  7.76-7.44 (m, 2H), 7.30 (t,  $J = 8.1$  Hz, 4H), 7.240 (t,  $J = 7.5$  Hz, 1H), 7.18 (d,  $J = 6$  Hz, 3H), 7.13 (q,  $J = 7.8$  Hz, 5H), 6.96 (br, 2H), 6.30 (s, 1H), 4.51-4.40 (m, 2H).  $^{13}\text{C}$  NMR (150 MHz,  $\text{CD}_3\text{OD}$ )  $\delta$  173.48, 172.43, 138.69, 137.55, 135.57, 134.61, 134.18, 133.93, 133.64, 133.40, 133.18, 131.82, 131.36, 130.54, 130.28, 129.82, 129.42, 129.28, 128.72, 67.38, 67.20, 44.34.  $^{11}\text{B}$  NMR (192.5 MHz,  $\text{CD}_3\text{OD}$ )  $\delta$  27.40. HRMS (ESI, positive ion)( $m/z$ ):  $[\text{M} + \text{Na}]^+$ , calcd for  $\text{C}_{28}\text{H}_{26}\text{B}_2\text{N}_2\text{O}_6\text{Na}$ , 531.18692; found 531.18754.

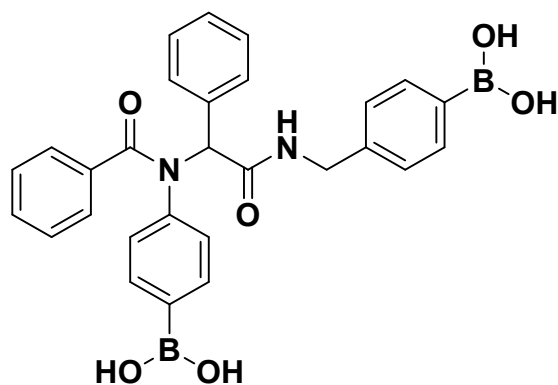

**A3**

**(4-((2-(N-(4-boronophenyl)benzamido)-2-phenylacetamido)methyl)phenyl)boronic acid**

$^1\text{H}$  NMR (600 MHz,  $\text{CD}_3\text{OD}$ )  $\delta$  7.66 (d,  $J = 7.2$  Hz, 1H), 7.53 (d,  $J = 6.6$  Hz, 1H), 2.90 (d,  $J = 7.8$  Hz, 4H), 7.23 (d,  $J = 7.2$  Hz, 2H), 7.20-7.17 (m, 9H), 6.30 (s, 1H), 4.46 (s, 2H).  $^{13}\text{C}$  NMR (150 MHz,  $\text{CD}_3\text{OD}$ )  $\delta$  173.50, 172.43, 137.64, 135.62, 135.06, 134.72, 134.60, 131.85, 131.62, 131.42, 130.54, 129.47, 129.28, 128.74, 127.62, 127.49, 67.27, 44.23.  $^{11}\text{B}$  NMR (192.5 MHz,  $\text{CD}_3\text{OD}$ )  $\delta$  29.08. HRMS (ESI, positive ion)( $m/z$ ):  $[\text{M} + \text{Na}]^+$ , calcd for  $\text{C}_{28}\text{H}_{26}\text{B}_2\text{N}_2\text{O}_6\text{Na}$ , 531.18692; found 531.18761.

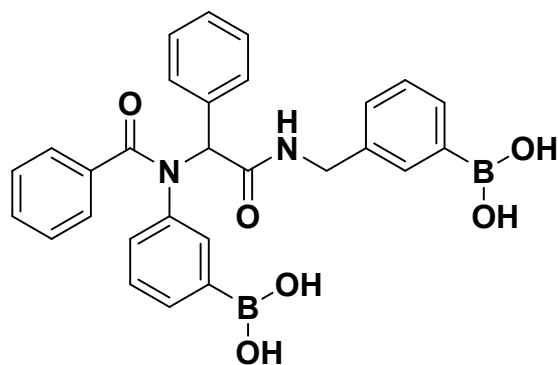

**A4**

**(3-((2-(N-(3-boronophenyl)benzamido)-2-phenylacetamido)methyl)phenyl)boronic acid**

$^1\text{H}$  NMR (600 MHz,  $\text{CD}_3\text{OD}$ )  $\delta$  7.87-7.20 (m, 1H), 6.10 (d,  $J = 6.6$  Hz, 1H), 7.55-7.49 (m, 1H), 7.30 (t,  $J = 9$  Hz, 4H), 7.25 (d,  $J = 7.8$  Hz, 1H), 7.17 (d,  $J = 7.2$  Hz, 3H), 7.13 (q,  $J = 7.8$  Hz, 6H), 6.93 (br, 1H), 6.31 (br, 1H), 4.53-4.41 (m, 2H).  $^{13}\text{C}$  NMR (150 MHz,  $\text{CD}_3\text{OD}$ )  $\delta$  173.61, 172.51, 137.67, 135.66, 133.94, 133.64, 133.39, 133.19, 131.88, 130.45, 130.28, 129.80, 129.39, 129.30, 128.73, 67.27, 44.34.  $^{11}\text{B}$  NMR (192.5 MHz,  $\text{CD}_3\text{OD}$ )  $\delta$  28.77. HRMS (ESI, positive ion)( $m/z$ ):  $[\text{M} + \text{Na}]^+$ , calcd for  $\text{C}_{28}\text{H}_{26}\text{B}_2\text{N}_2\text{O}_6\text{Na}$ , 531.18692; found 531.18765.

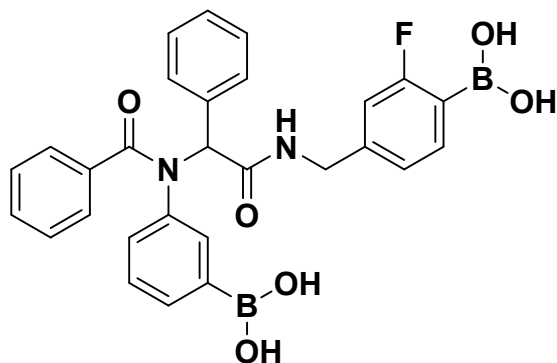

**A5**

**(3-(N-(2-((4-borono-3-fluorobenzyl)amino)-2-oxo-1-phenylethyl)benzamido)phenyl)boronic acid**

$^1\text{H}$  NMR (600 MHz,  $\text{CD}_3\text{OD}$ )  $\delta$  7.33-7.30 (m, 2H), 7.29 (s, 1H), 7.28 (d,  $J = 1.8$  Hz, 1H), 7.15 (tt,  $J = 7.8, 16.8$  Hz, 11H), 6.96 (br, 2H), 6.28 (d,  $J = 23.4$  Hz, 1H), 4.46 (s, 2H).  $^{13}\text{C}$  NMR (150 MHz,  $\text{CD}_3\text{OD}$ )  $\delta$  172.17, 171.24, 136.22, 134.16, 131.99, 130.45, 129.03, 128.07, 127.30, 122.52, 113.16, 112.99, 65.97, 65.74, 42.18.  $^{11}\text{B}$  NMR (192.5 MHz,  $\text{CD}_3\text{OD}$ )  $\delta$  29.21. HRMS (ESI, positive ion)( $m/z$ ):  $[\text{M} + \text{Na}]^+$ , calcd for  $\text{C}_{28}\text{H}_{26}\text{B}_2\text{N}_2\text{O}_6\text{FNa}$ , 549.17750; found 549.17750.

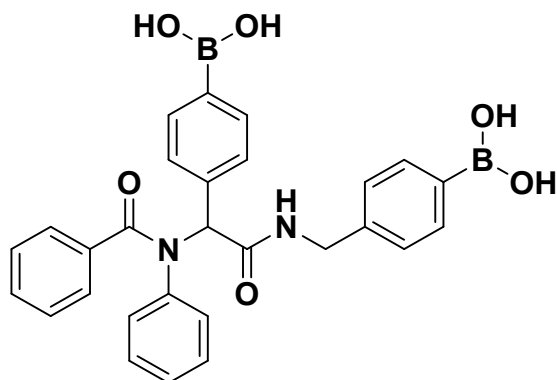

**B1**

**(4-(2-((4-boronobenzyl)amino)-2-oxo-1-(N-phenylbenzamido)ethyl)phenyl)boronic acid**

$^1\text{H}$  NMR (600 MHz,  $\text{CD}_3\text{OD}$ )  $\delta$  7.66 (br, 1H), 7.53 (br, 2H), 7.38 (br, 1H), 7.28 (d,  $J = 7.8$  Hz, 2H), 7.24 (br, 2H), 7.19 (t,  $J = 7.8$  Hz, 1H), 7.13 (t,  $J = 7.5$  Hz, 4H), 7.00 (br, 2H), 6.90 (d, 3.6 Hz, 3H), 6.30 (s, 1H), 4.60 (s, 2H).  $^{13}\text{C}$  NMR (150 MHz,  $\text{CD}_3\text{OD}$ )  $\delta$  173.59, 172.37, 141.45, 137.66, 135.05, 134.75, 134.36, 132.44, 130.99, 130.47, 129.23, 129.04, 128.73, 128.29, 127.51, 67.24, 44.21.  $^{11}\text{B}$  NMR (192.5 MHz,  $\text{CD}_3\text{OD}$ )  $\delta$  29.31. HRMS (ESI, positive ion)( $m/z$ ):  $[\text{M} + \text{Na}]^+$ , calcd for  $\text{C}_{28}\text{H}_{26}\text{B}_2\text{N}_2\text{O}_6\text{Na}$ , 531.18692; found 531.18694.



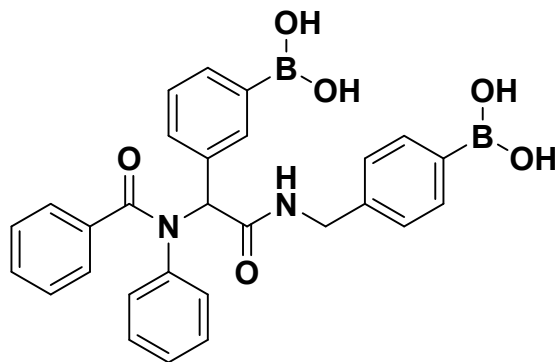

**B2**

**(4-((2-(3-boronophenyl)-2-(N-phenylbenzamido)acetamido)methyl)phenyl)boronic acid**

$^1\text{H}$  NMR (600 MHz,  $\text{CD}_3\text{OD}$ )  $\delta$  7.65 (br, 2H), 7.59 (br, 2H), 7.28 (d,  $J = 7.8$  Hz), 7.24 (t,  $J = 6.3$  Hz, 2H), 7.18 (d,  $J = 7.2$  Hz, 1H), 7.13 (t,  $J = 7.5$  Hz, 3H), 7.09 (br, 1H), 6.98 (br, 2H), 6.91 (s, 3H), 6.32 (t,  $J = 17.4$  Hz, 1H), 4.55-4.39 (m, 2H).  $^{13}\text{C}$  NMR (150 MHz,  $\text{CD}_3\text{OD}$ )  $\delta$  173.65, 172.53, 141.34, 137.63, 135.03, 134.66, 133.48, 132.43, 130.46, 129.17, 129.03, 128.92, 128.73, 128.46, 128.25, 127.49, 67.35, 44.22.  $^{11}\text{B}$  NMR (192.5 MHz,  $\text{CD}_3\text{OD}$ )  $\delta$  28.38 HRMS (ESI, positive ion)( $m/z$ ):  $[\text{M} + \text{Na}]^+$ , calcd for  $\text{C}_{28}\text{H}_{26}\text{B}_2\text{N}_2\text{O}_6\text{Na}$ , 531.18692; found 531.18746.

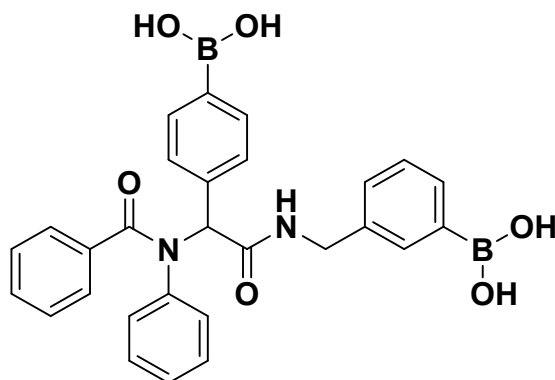

**B3**

**(3-((2-(4-boronophenyl)-2-(N-phenylbenzamido)acetamido)methyl)phenyl)boronic acid**

$^1\text{H}$  NMR (600 MHz,  $\text{CD}_3\text{OD}$ )  $\delta$  7.76 (s, 1H), 7.61 (d,  $J = 6.6$  Hz, 1H), 7.26 (s, 1H), 7.58 (d,  $J = 12.6$  Hz, 1H), 7.30 (t,  $J = 9$  Hz, 3H), 7.24 (t,  $J = 7.5$  Hz, 1H), 7.19 (t,  $J = 7.2$  Hz, 1H), 7.13 (t,  $J = 1.8$  Hz, 4H), 7.00 (br, 1H), 6.91 (s, 3H), 6.30 (s, 1H), 4.53-4.04 (m, 2H).  $^{13}\text{C}$  NMR (150 MHz,  $\text{CD}_3\text{OD}$ )  $\delta$  173.59, 172.37, 141.47, 138.69, 137.59, 134.78, 134.34, 133.94, 133.64, 133.15, 132.39, 130.95, 130.48, 130.30, 129.26, 129.04, 128.72, 128.28, 67.36, 44.35.  $^{11}\text{B}$  NMR (192.5 MHz,  $\text{CD}_3\text{OD}$ )  $\delta$  29.68. HRMS (ESI, positive ion)( $m/z$ ):  $[\text{M} + \text{Na}]^+$ , calcd for  $\text{C}_{28}\text{H}_{26}\text{B}_2\text{N}_2\text{O}_6\text{Na}$ , 531.18692; found 531.18653.

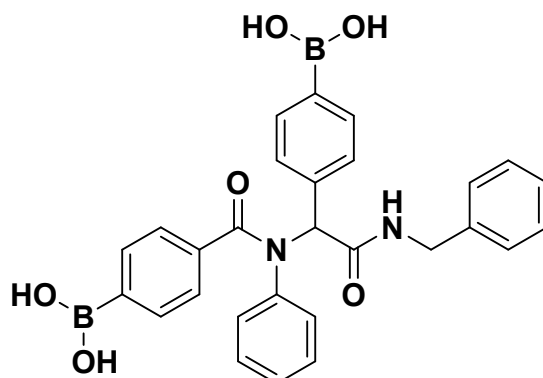

**C1**

**(4-(2-(benzylamino)-1-(4-borono-N-phenylbenzamido)-2-oxoethyl)phenyl)boronic acid**

$^1\text{H}$  NMR (600 MHz,  $\text{CD}_3\text{OD}$ )  $\delta$  7.56 (br, 2H), 7.28 (d,  $J = 4.2$  Hz, 6H), 7.22 (d,  $J = 4.2$  Hz, 1H), 7.20 (d,  $J = 4.2$  Hz, 2H), 7.18 (s, 1H), 7.03 (br, 2H), 6.93 (s, 3H), 6.33 (s, 1H), 4.47 (t,  $J = 16.8$  Hz, 2H).  $^{13}\text{C}$  NMR (150 MHz,  $\text{CD}_3\text{OD}$ )  $\delta$  173.71, 172.33, 141.40, 139.85, 134.80, 134.12, 132.43, 131.01, 129.46, 129.08, 128.43, 128.36, 128.25, 128.10, 67.26, 44.28.  $^{11}\text{B}$  NMR (192.5 MHz,  $\text{CD}_3\text{OD}$ )  $\delta$  27.22 HRMS (ESI, positive ion)( $m/z$ ):  $[\text{M} + \text{Na}]^+$ , calcd for  $\text{C}_{28}\text{H}_{26}\text{B}_2\text{N}_2\text{O}_6\text{Na}$ , 531.18692; found 531.18637.

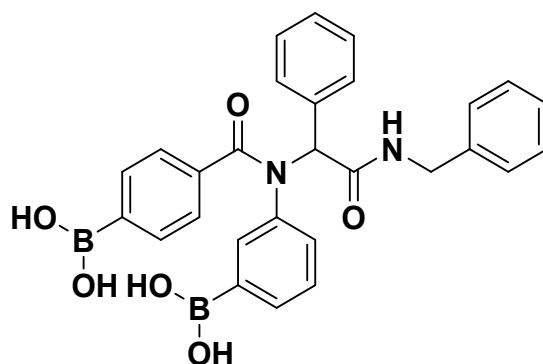

**D1**

**(4-((2-(benzylamino)-2-oxo-1-phenylethyl)(3-boronophenyl)carbamoyl)phenyl)boronic acid**

$^1\text{H}$  NMR (600 MHz,  $\text{CD}_3\text{OD}$ )  $\delta$  7.59-7.46 (br, 1H), 7.41-7.36 (br, 2H), 7.32 (br, 1H), 7.29 (d,  $J = 4.2$  Hz, 5H), 7.23 (q,  $J = 4.2$  Hz, 1H), 7.19 (t,  $J = 6.9$  Hz, 3H), 7.16 (d,  $J = 7.2$  Hz, 2H), 7.06-7.03 (br, 1H), 6.96-6.88 (br, 1H), 6.36 (s, 1H), 4.49 (s, 2H).  $^{13}\text{C}$  NMR (150 MHz,  $\text{CD}_3\text{OD}$ )  $\delta$  173.64, 172.48, 139.86, 135.69, 131.90, 129.44, 129.31, 128.42, 128.31, 128.08, 67.20, 44.27.  $^{11}\text{B}$  NMR (192.5 MHz,  $\text{CD}_3\text{OD}$ )  $\delta$  27.54 HRMS (ESI, negative ion)( $m/z$ ):  $[\text{M} - \text{H}]^-$ , calcd for  $\text{C}_{28}\text{H}_{25}\text{B}_2\text{N}_2\text{O}_6$ , 507.19042; found 507.19079.

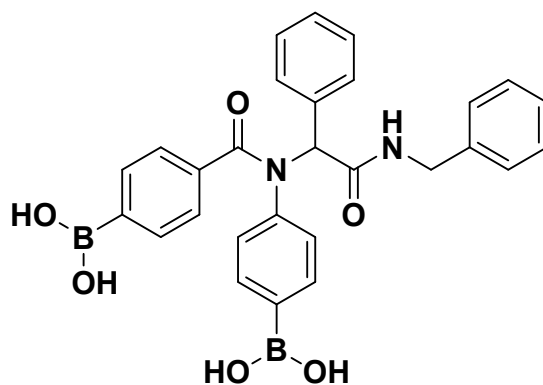

**D2**

**(4-((2-(benzylamino)-2-oxo-1-phenylethyl)(4-boronophenyl)carbamoyl)phenyl)boronic acid**

$^1\text{H}$  NMR (600 MHz,  $\text{CD}_3\text{OD}$ )  $\delta$  7.54-7.52 (br, 1H), 7.34 (br, 1H), 7.32 (d,  $J = 7.2$  Hz, 1H), 7.28 (s, 2H), 7.27 (d,  $J = 1.8$  Hz, 2H), 7.26-7.20 (m, 4H), 7.15 (q,  $J = 7.2$  Hz, 3H), 7.00 (br, 1H), 6.34 (s, 1H), 4.47 (q,  $J = 6.6$  Hz, 2H).  $^{13}\text{C}$  NMR (150 MHz,  $\text{CD}_3\text{OD}$ )  $\delta$  173.58, 173.50, 172.38, 139.86, 135.64, 134.63, 134.13, 131.87, 131.46, 130.60, 139.51, 129.48, 129.33, 128.80, 128.45, 128.33, 128.11, 67.30, 44.30.  $^{11}\text{B}$  NMR (192.5 MHz,  $\text{CD}_3\text{OD}$ )  $\delta$  27.46. HRMS (ESI, positive ion)( $m/z$ ):  $[\text{M} + \text{Na}]^+$ , calcd for  $\text{C}_{28}\text{H}_{26}\text{B}_2\text{N}_2\text{O}_6\text{Na}$ , 531.18692; found 531.18725.

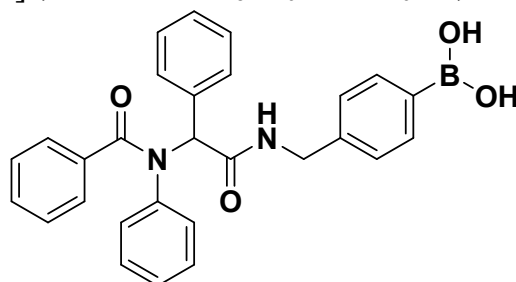

**E1**

**(4-((2-phenyl-2-(N-phenylbenzamido)acetamido)methyl)phenyl)boronic acid**

$^1\text{H}$  NMR (600 MHz,  $\text{CD}_3\text{OD}$ )  $\delta$  7.69 (s, 1H), 7.55 (s, 1H), 7.29 (d,  $J = 7.2$  Hz, 2H), 7.25 (br, 2H), 7.18 (q,  $J = 7.2$  Hz, 4H), 7.15-7.11 (m, 5H), 7.00 (br, 1H), 6.91 (s, 3H), 6.33 (s, 1H), 4.46 (q,  $J = 5.4$  Hz, 2H).  $^{13}\text{C}$  NMR (150 MHz,  $\text{CD}_3\text{OD}$ )  $\delta$  173.58, 172.48, 141.45, 137.69, 135.66, 135.11, 132.49, 131.90, 130.50, 129.48, 129.31, 129.25, 129.07, 128.77, 128.30, 127.54, 67.25, 44.23.  $^{11}\text{B}$  NMR (192.5 MHz,  $\text{CD}_3\text{OD}$ )  $\delta$  29.07. HRMS (ESI, positive ion)( $m/z$ ):  $[\text{M} + \text{Na}]^+$ , calcd for  $\text{C}_{28}\text{H}_{25}\text{BN}_2\text{O}_4\text{Na}$ , 487.17996; found 487.18049.

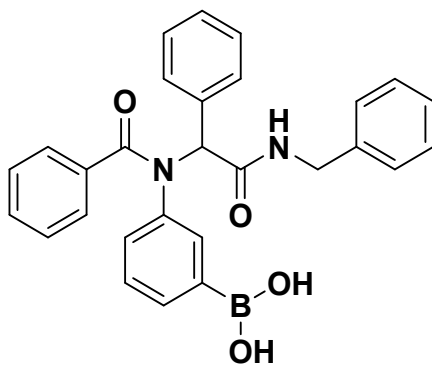

**E2**

**(3-(N-(2-(benzylamino)-2-oxo-1-phenylethyl)benzamido)phenyl)boronic acid**

$^1\text{H}$  NMR (600 MHz,  $\text{CD}_3\text{OD}$ )  $\delta$  7.29 (d,  $J = 7.2$  Hz, 3H), 7.26 (s, 2H), 7.25 (d,  $J = 1.2$  Hz, 2H), 7.24-7.18 (m, 2H), 7.17 (d,  $J = 3$  Hz, 1H), 7.16 (d,  $J = 1.8$  Hz, 2H), 7.15 (s, 1H), 7.13 (s, 2H), 7.12 (d,  $J = 3$  Hz, 2H), 7.10 (d,  $J = 1.2$  Hz, 1H), 6.93 (br, 1H), 6.29 (br, 1H), 4.45 (s, 2H).  $^{13}\text{C}$  NMR (150 MHz,  $\text{CD}_3\text{OD}$ )  $\delta$  173.56, 172.44, 139.81, 137.68, 135.67, 131.85, 130.41, 129.39, 129.25, 128.71, 128.36, 128.02, 67.16, 44.20.  $^{11}\text{B}$  NMR (192.5 MHz,  $\text{CD}_3\text{OD}$ )  $\delta$  28.01. HRMS (ESI, positive ion)( $m/z$ ):  $[\text{M} + \text{Na}]^+$ , calcd for  $\text{C}_{28}\text{H}_{25}\text{BN}_2\text{O}_4\text{Na}$ , 487.17996; found 487.17999.

## 2 Analysis section

### Materials of various boronic acid analogs investigated

#### A series

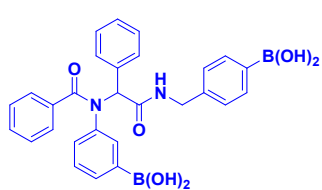

A1

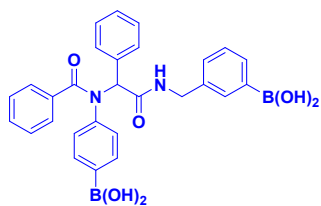

A2

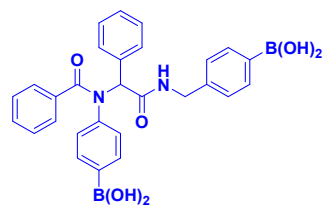

A3

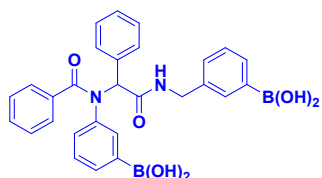

A4

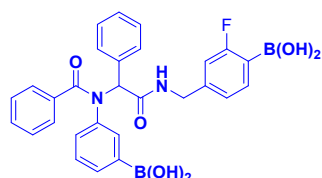

A5

#### B series

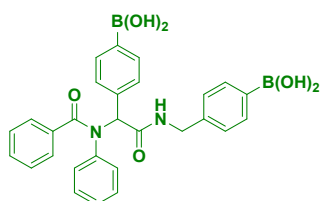

B1

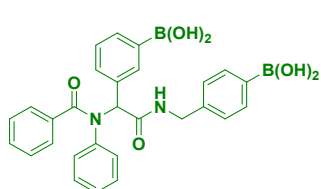

B2

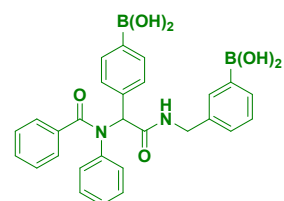

B3

#### C series

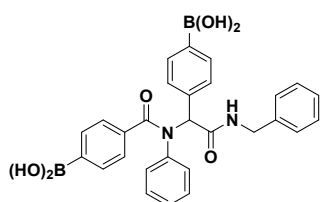

C1

#### D series

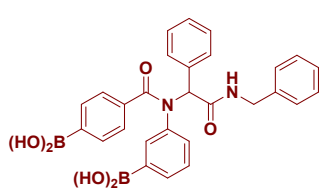

D1

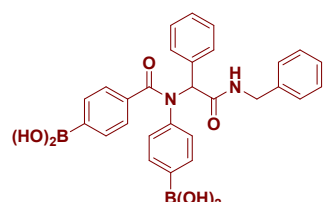

D2

#### E series

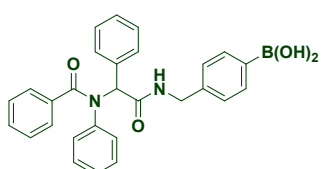

E1

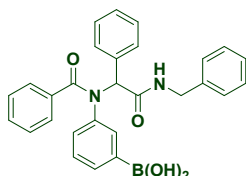

E2

All materials utilized were synthesized and purified by the abovementioned procedure.

## Measurements and Calculations of Binding Constant

The binding constants of ARS and boronic acid were determined through spectroscopic methods. ARS stock solution ( $4.5 \times 10^{-5}$  M) was prepared in deionized water and 0.5M stock sodium phosphate buffer at different pH levels (6.0, 6.5, 7.0, and 7.5). Mono- and bis-boronic acid stock solutions were prepared in both deionized water and DMSO/H<sub>2</sub>O (8:2) for each boronic acid, while sialic acid or saccharide stock solutions were prepared in DMSO/H<sub>2</sub>O (8:2).

Two 200  $\mu$ l solutions were created from these stocks. The first solution contained boronic acid, phosphate buffer, water, and DMSO/H<sub>2</sub>O (8:2). The second solution contained the same boronic acid solution, ARS, phosphate buffer, water, and sialic acid or saccharide dissolved in DMSO/H<sub>2</sub>O (8:2). A non-fluorescent ARS standard was prepared as a solution of ARS and phosphate buffer in the absence of boronic acid and used as a fluorescent blank.

Fluorescence values were measured using a microplate analyzer, with samples excited at 468 nm and emission measured at 572 nm. In the first solution, fluorescence increased with boronic acid concentration, while in the second solution, fluorescence decreased with sugar concentration. The competition among boronic acid, ARS, and diol was leveraged to determine binding constants using a formula from the literature.

| Stock solution concentration (M) |                         |                                            |                                                |                       |
|----------------------------------|-------------------------|--------------------------------------------|------------------------------------------------|-----------------------|
| ARS                              | sodium phosphate buffer |                                            | Boronic acid                                   |                       |
| $4.5 \times 10^{-5}$             | 0.5                     |                                            | $2.25 \times 10^{-3} \sim 1.25 \times 10^{-4}$ |                       |
| Sialic acid                      | pH 6.0                  | $6 \times 10^{-2} \sim 2.8 \times 10^{-2}$ | Boronic acid                                   | $4.5 \times 10^{-4}$  |
|                                  | pH 6.5                  | $6 \times 10^{-2} \sim 5 \times 10^{-2}$   |                                                | $5 \times 10^{-4}$    |
|                                  | pH 7.0                  | $1 \times 10^{-1} \sim 7 \times 10^{-2}$   |                                                | $1.25 \times 10^{-4}$ |
|                                  | pH 7.5                  | $1 \times 10^{-1} \sim 3 \times 10^{-2}$   |                                                | $4.5 \times 10^{-4}$  |
| Fructose                         | pH 6.0 and 6.5          | $9 \times 10^{-2} \sim 5 \times 10^{-2}$   |                                                | $5 \times 10^{-4}$    |
|                                  | pH 7.0 and 7.5          | $1 \times 10^{-2} \sim 3.5 \times 10^{-3}$ |                                                | $2 \times 10^{-3}$    |
| Galactose                        | pH 7.0 and 7.5          | $3 \times 10^{-1} \sim 2.5 \times 10^{-2}$ |                                                | $2.5 \times 10^{-4}$  |
| Glucose                          | pH 7.0 and 7.5          | $5 \times 10^{-1} \sim 2.5 \times 10^{-2}$ |                                                |                       |

- Plot of (1/ fluorescence intensity) against (1/ [BA])
- $K_{ARS} = \text{intercept} / \text{slope}$
- Plot of [Diol] / P against Q.

$$\left\{ \begin{array}{l} Q \text{ value} = \frac{((F_{BA} - ARS - blank) - (F_{BA} - SA - blank))}{F_{BA} - SA - blank} \\ P \text{ value} = [BA] \frac{1}{(Q \times K_{ARS})} - \frac{[ARS]}{(1 + Q)} \end{array} \right.$$

- $K_{eq} = K_{ARS} / \text{slope}$

## DFT calculations

□□ All density functional calculations in this work were performed using the CAM-B3LYP functional as implemented in Gaussian 09. All atoms were described using the 6-31+G(d,p) basis set. Solvation energies were calculated using a polarized continuum model for the solvate containing dimethyl sulfoxide and water (9:16 ratio) with dielectric constant  $\epsilon = 67.2$  for all calculations. All optimized structures were characterized by vibrational frequency calculations. All optimized structures were characterized by vibrational frequency calculations, which are with zero imaginary frequency and obtained thermodynamically corrected at 298 K. The reaction energy used to calculate the binding constant for bis-boronic acid binding to one sialic acid is defined as Equation A, where we consider the boronic acid compound as a whole:

$$\Delta G = G_{Ugi+SA} + G_{H2O} - (G_{Ugi} + G_{SA}) \quad \text{(Equation A)}$$

where  $G_{Ugi+SA}$  is the free energy of Ugi-SA complex.  $G_{Ugi}$ ,  $G_{SA}$  and  $G_{H2O}$  are the energy of isolated Ugi structure, sialic acid and water molecule, respectively.

The reaction energy used to calculate the binding constant for bis-boronic acid binding to two sialic acids is defined as Equation B, where we consider the boronic acid compound as a whole:

$$\Delta G = G_{Ugi+2SA} + 2G_{H2O} - (G_{Ugi} + 2G_{SA}) \quad \text{(Equation B)}$$

where  $G_{Ugi+2SA}$  is the free energy of bis-boronic acids with two sialic acids complex (Ugi-2SA).  $G_{Ugi}$ ,  $G_{SA}$  and  $G_{H2O}$  are the energy of isolated Ugi structure, sialic acid and water molecule, respectively.

$$\Delta G = \Delta E + \Delta E_{ZPE} - T\Delta S$$

This equation considers the factors such as zero-point energy ( $\Delta E_{ZPE}$ ) and entropy change ( $\Delta S$ ) to better represent the real-world scenarios accurately.

### 3 Supplementary Tables and Figures

#### 1 Copies of $^1\text{H}$ NMR, $^{13}\text{C}$ NMR, $^{11}\text{B}$ NMR and Mass spectra

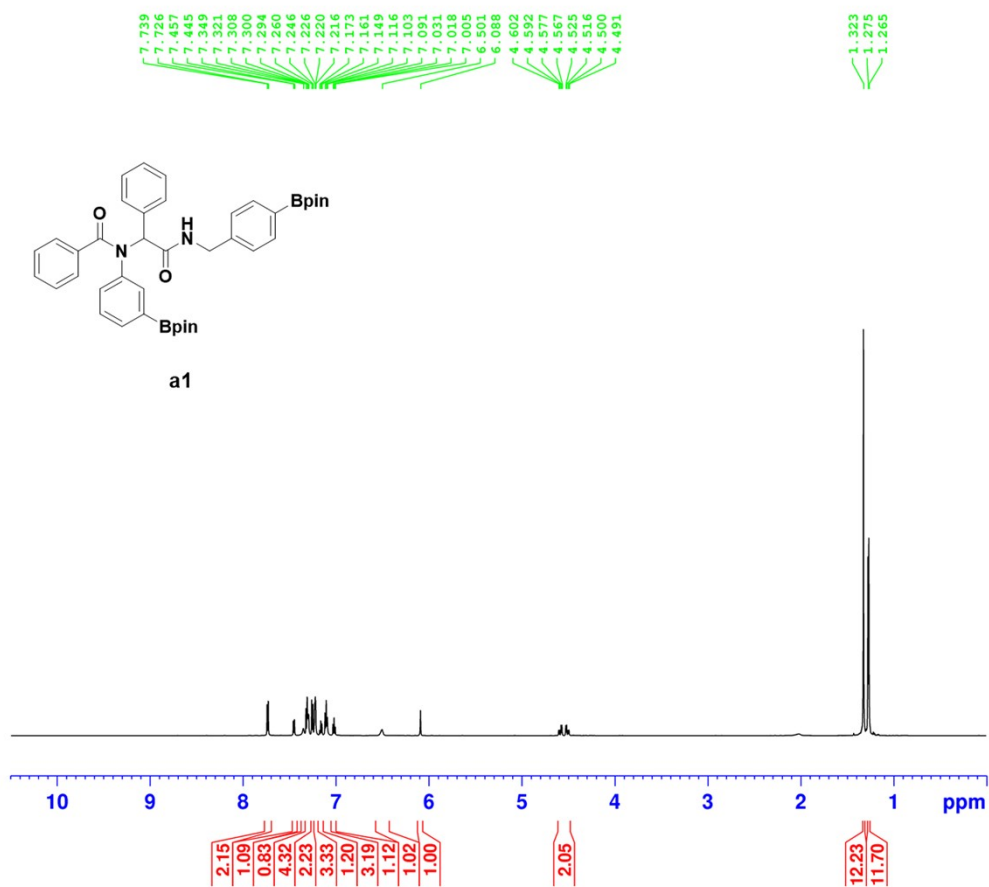

**Figure S1.**  $^1\text{H}$  NMR (600 MHz,  $\text{CDCl}_3$ ) spectrum of compound **a1**  
**Figure S2.**  $^{13}\text{C}$  NMR (150 MHz,  $\text{CDCl}_3$ ) spectrum of compound **a1**



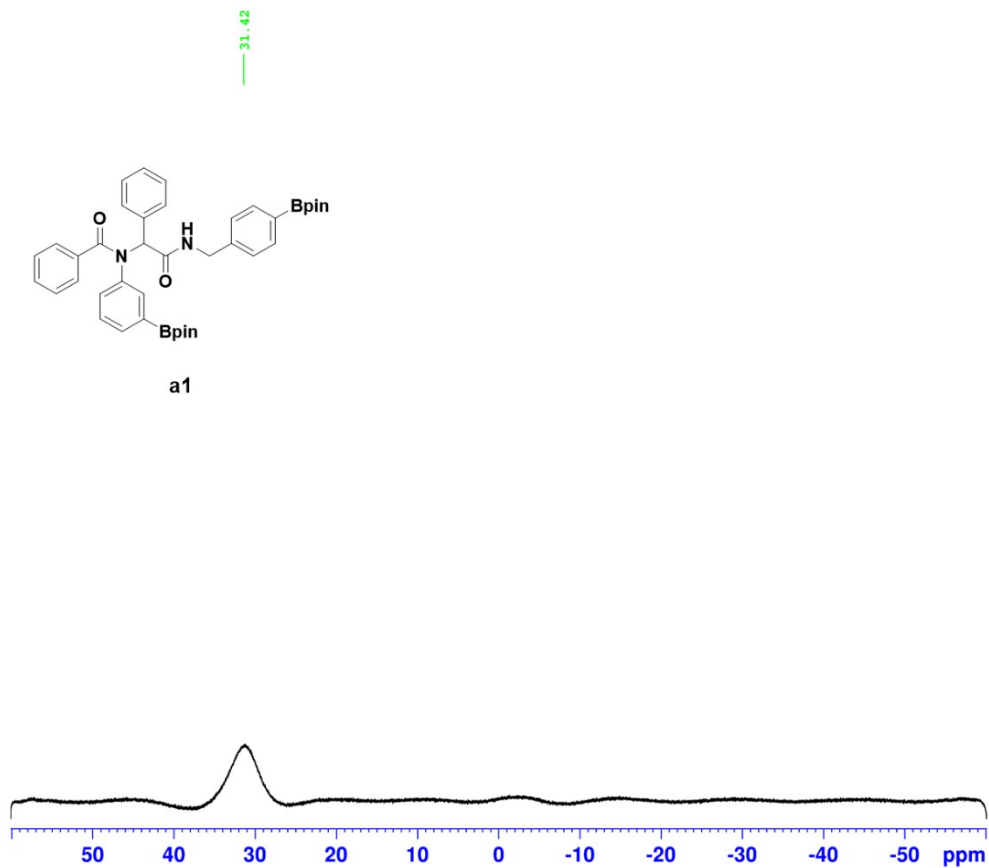

**Figure S3.**  $^{11}\text{B}$  NMR (192.5 MHz,  $\text{CDCl}_3$ ) spectrum of compound **a1**

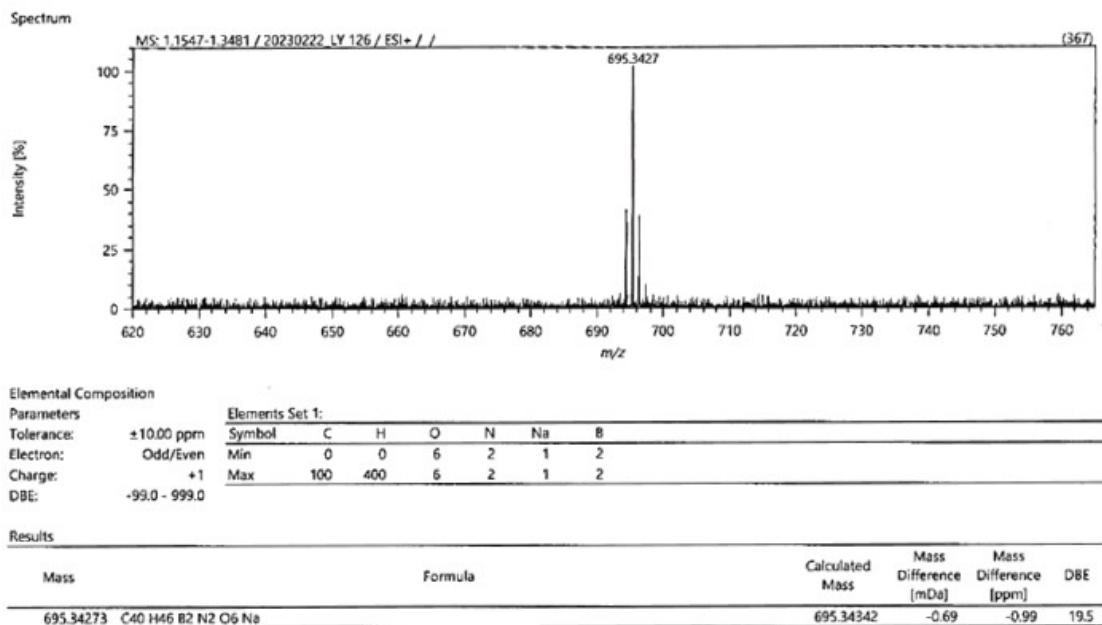

**Figure S4.** HRMS (ESI, positive ion)  $[\text{M} + \text{Na}]^+$  spectrum of compound **a1**

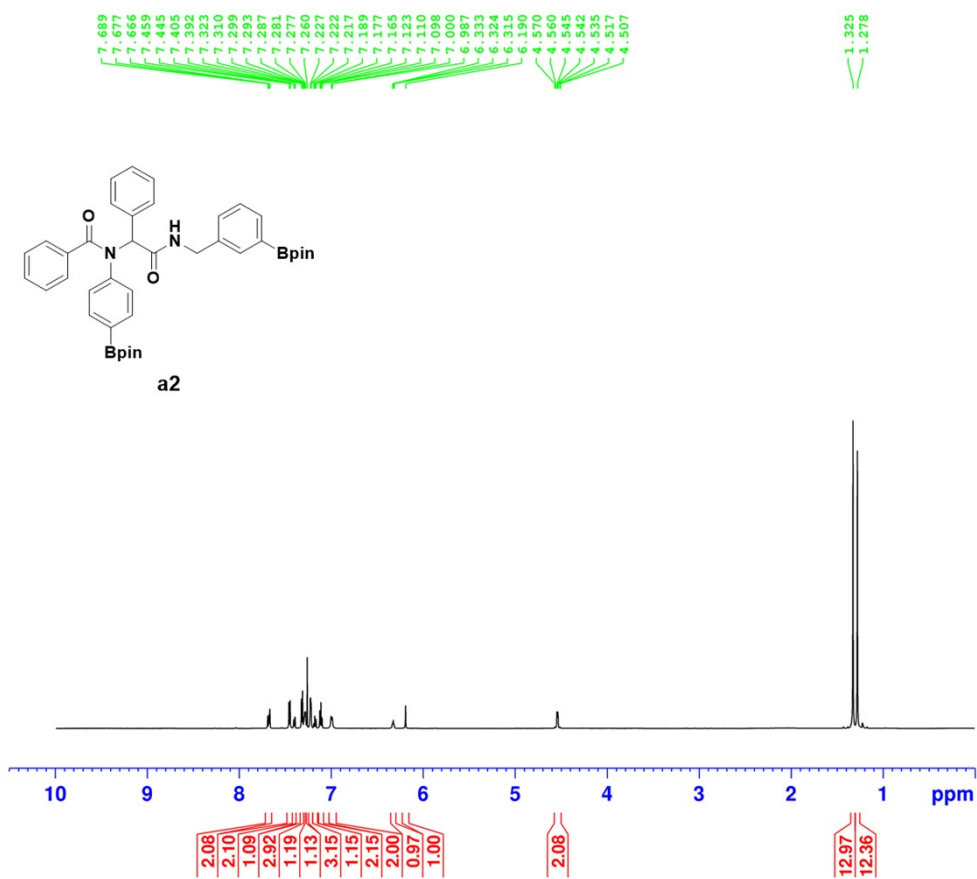

**Figure S5.** <sup>1</sup>H NMR (600 MHz, CDCl<sub>3</sub>) spectrum of compound **a2**

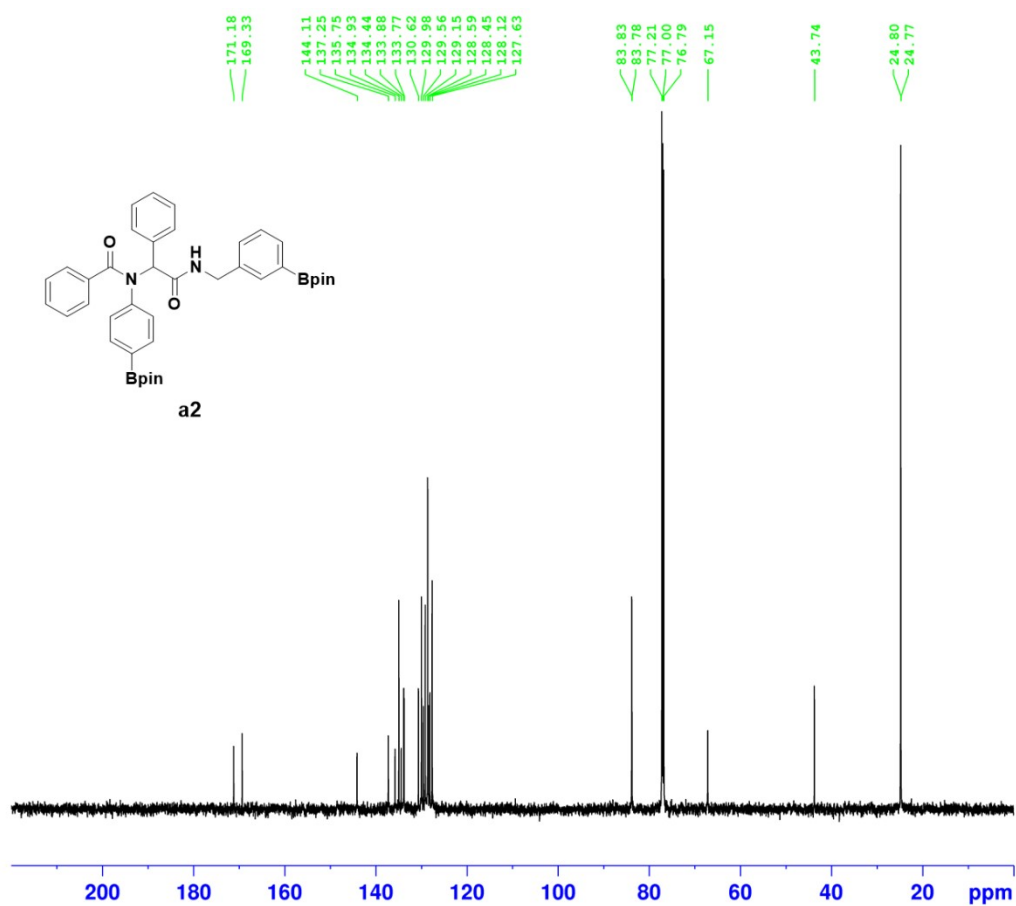

**Figure S6.** <sup>13</sup>C NMR (150 MHz, CDCl<sub>3</sub>) spectrum of compound **a2**

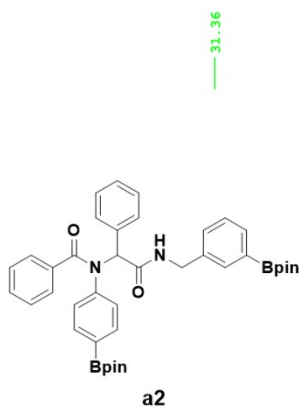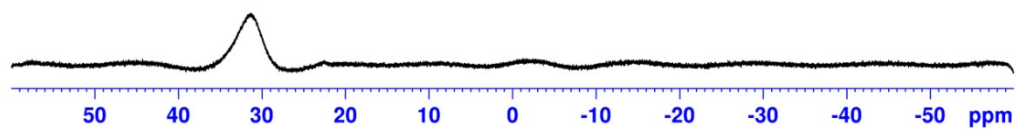

**Figure S7.** <sup>11</sup>B NMR (192.5 MHz, CDCl<sub>3</sub>) spectrum of compound **a2**

**Figure S8.** HRMS (ESI, positive ion) [M + Na]<sup>+</sup> spectrum of compound **a2**

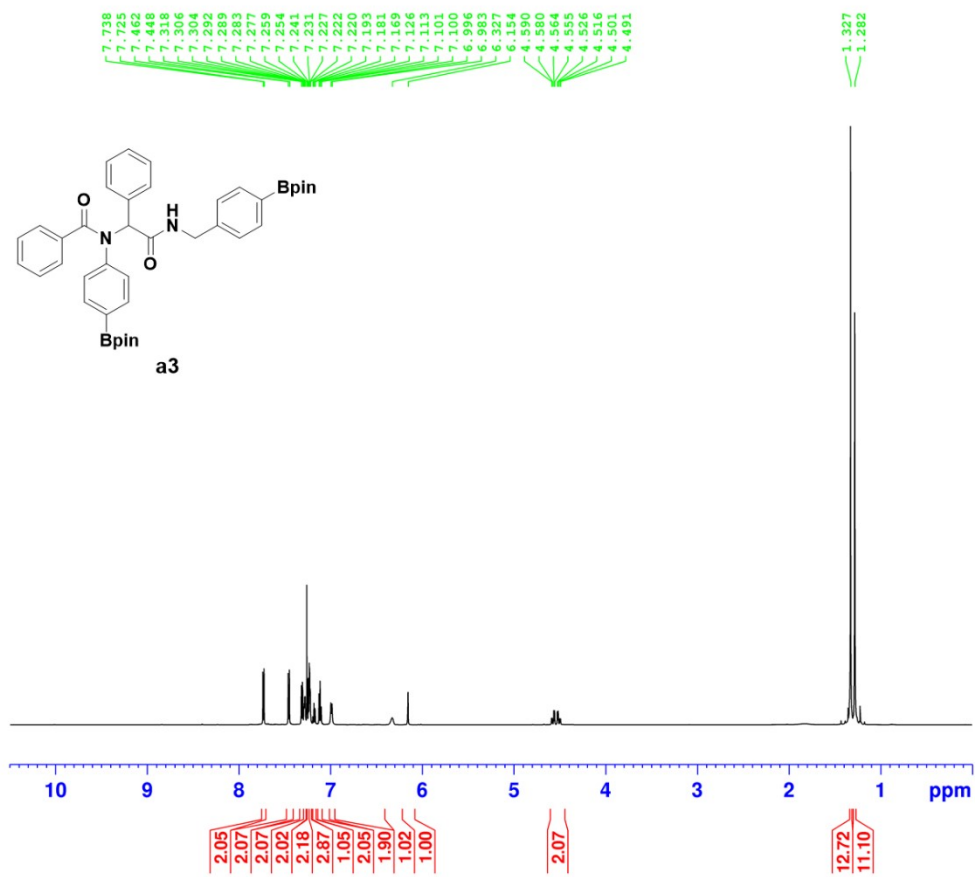

Figure S9. <sup>1</sup>H NMR (600 MHz, CDCl<sub>3</sub>) spectrum of compound **a3**

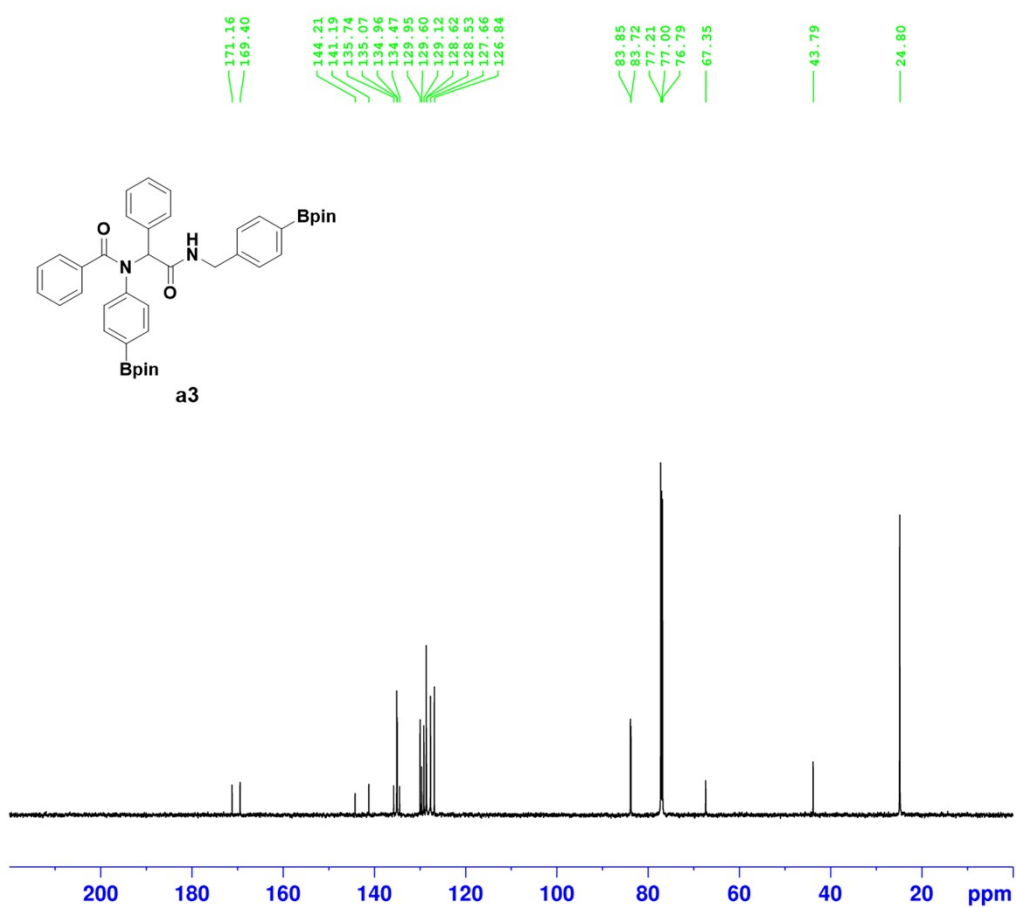

Figure S10. <sup>13</sup>C NMR (150 MHz, CDCl<sub>3</sub>) spectrum of compound **a3**

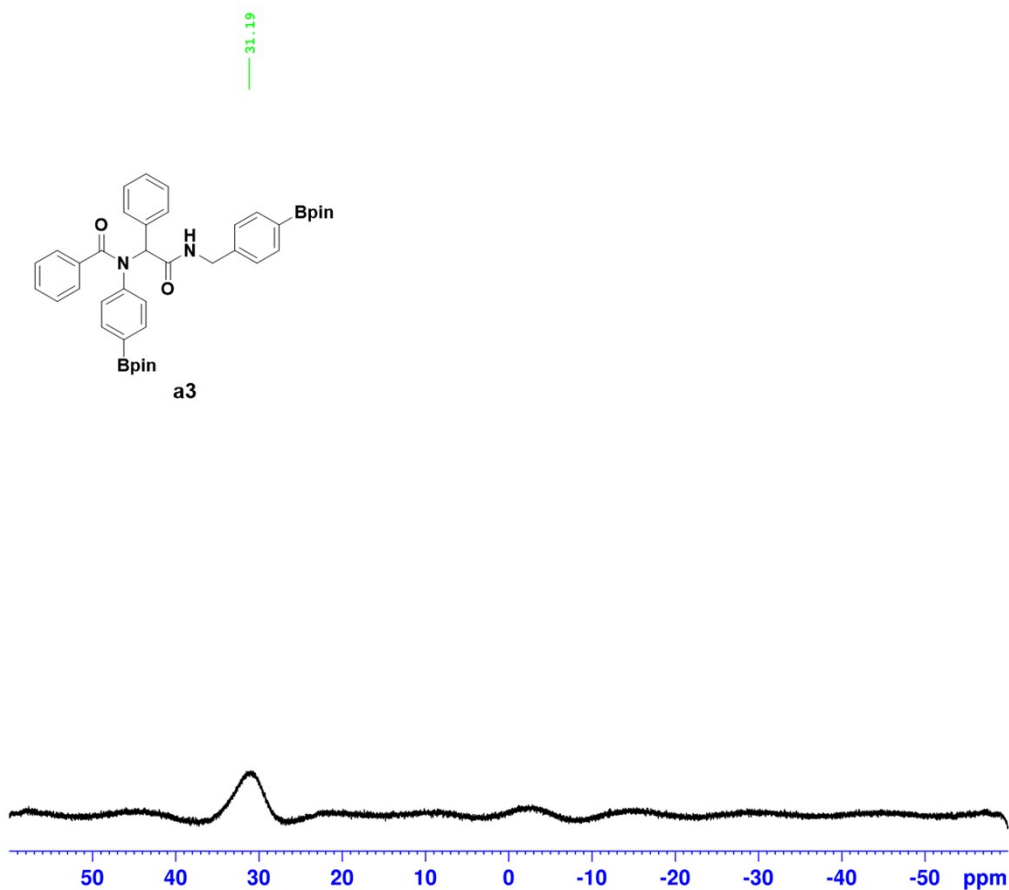

**Figure S11.**  $^{11}\text{B}$  NMR (192.5 MHz,  $\text{CDCl}_3$ ) spectrum of compound **a3**

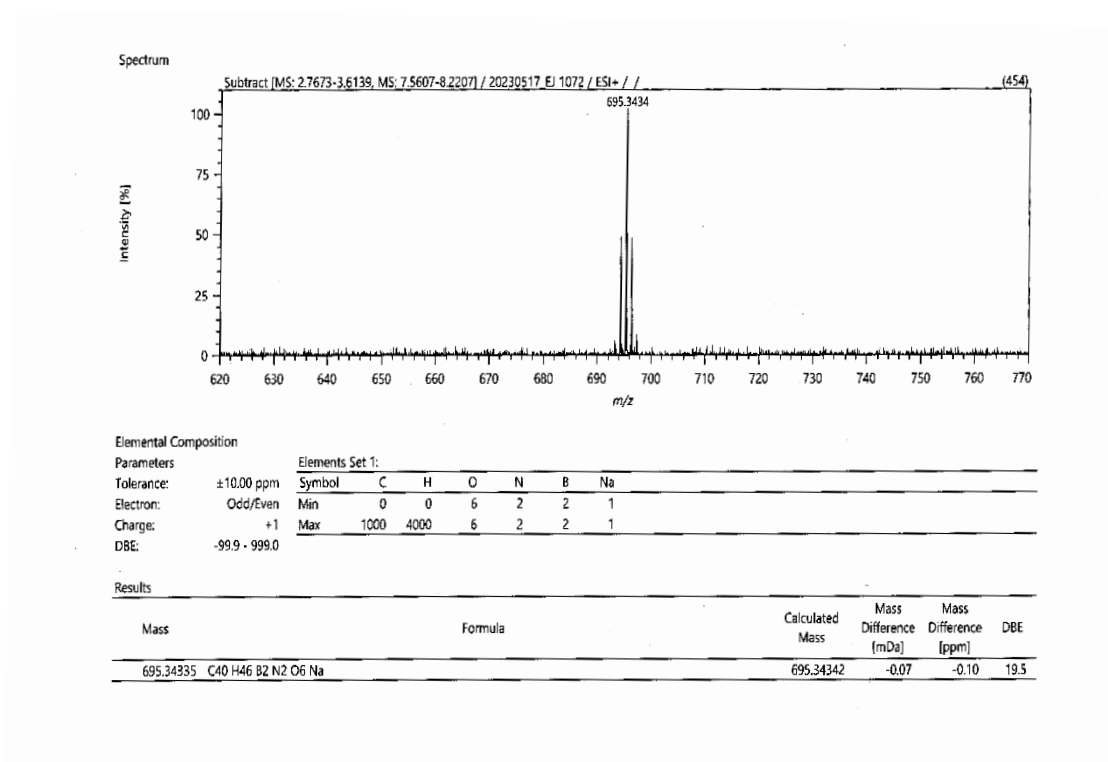

**Figure S12.** HRMS (ESI, positive ion)  $[\text{M} + \text{Na}]^+$  spectrum of compound **a3**

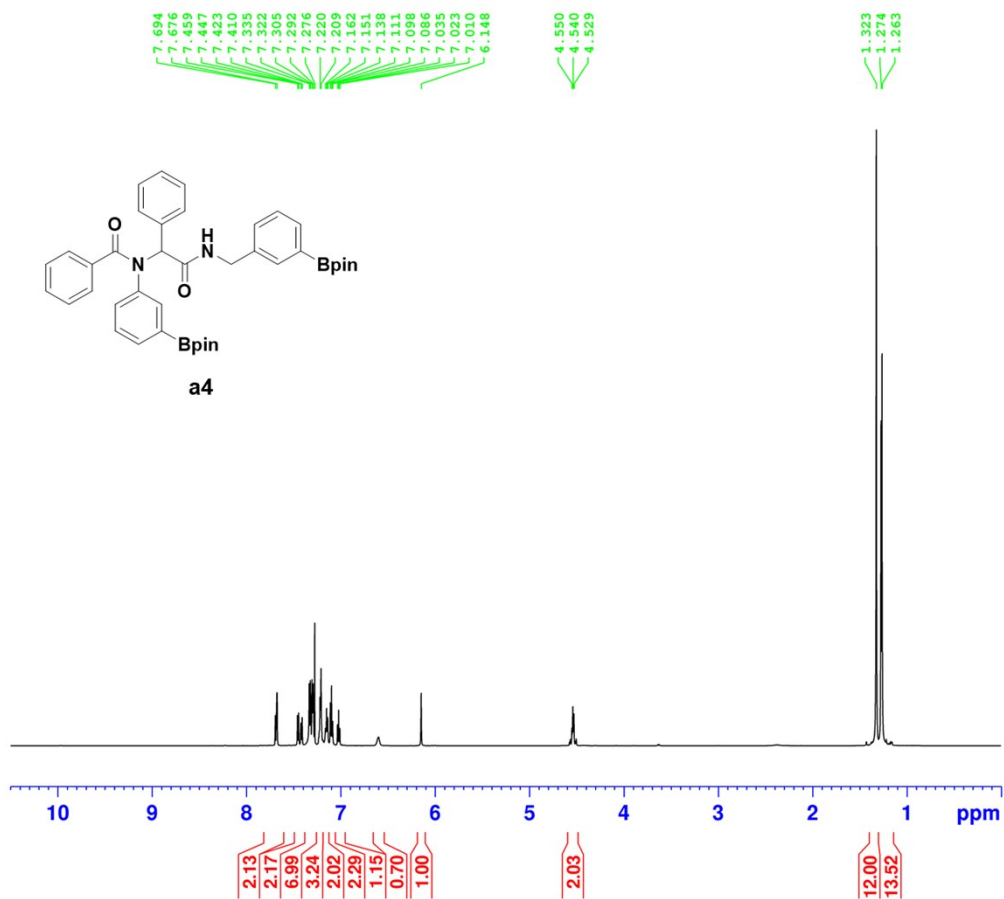

Figure S13.  $^1\text{H}$  NMR (600 MHz,  $\text{CDCl}_3$ ) spectrum of compound **a4**

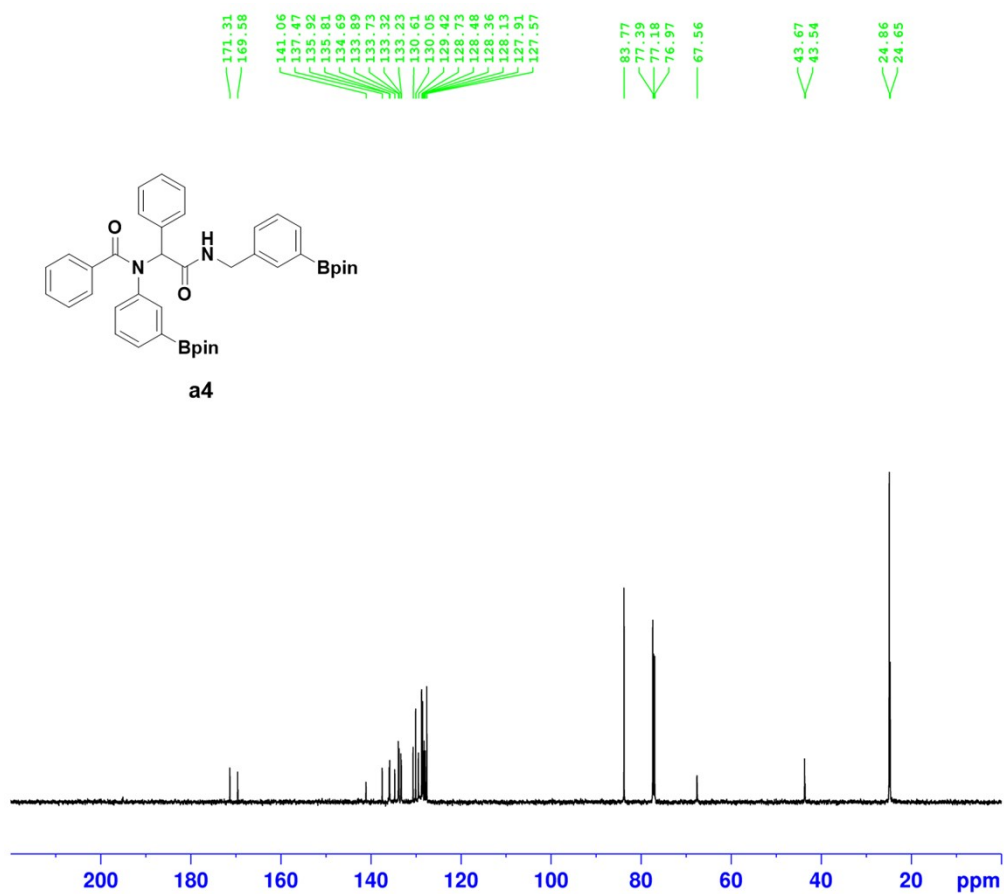

Figure S14.  $^{13}\text{C}$  NMR (150 MHz,  $\text{CDCl}_3$ ) spectrum of compound **a4**

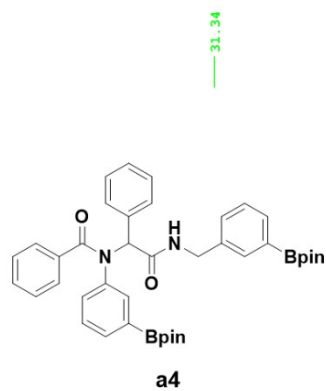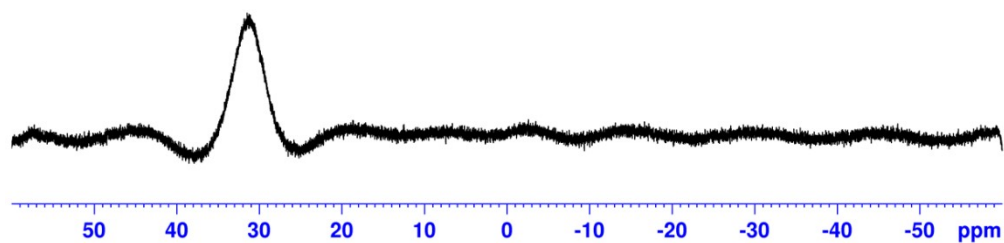

**Figure S15.**  $^{11}\text{B}$  NMR (192.5 MHz,  $\text{CDCl}_3$ ) spectrum of compound **a4**

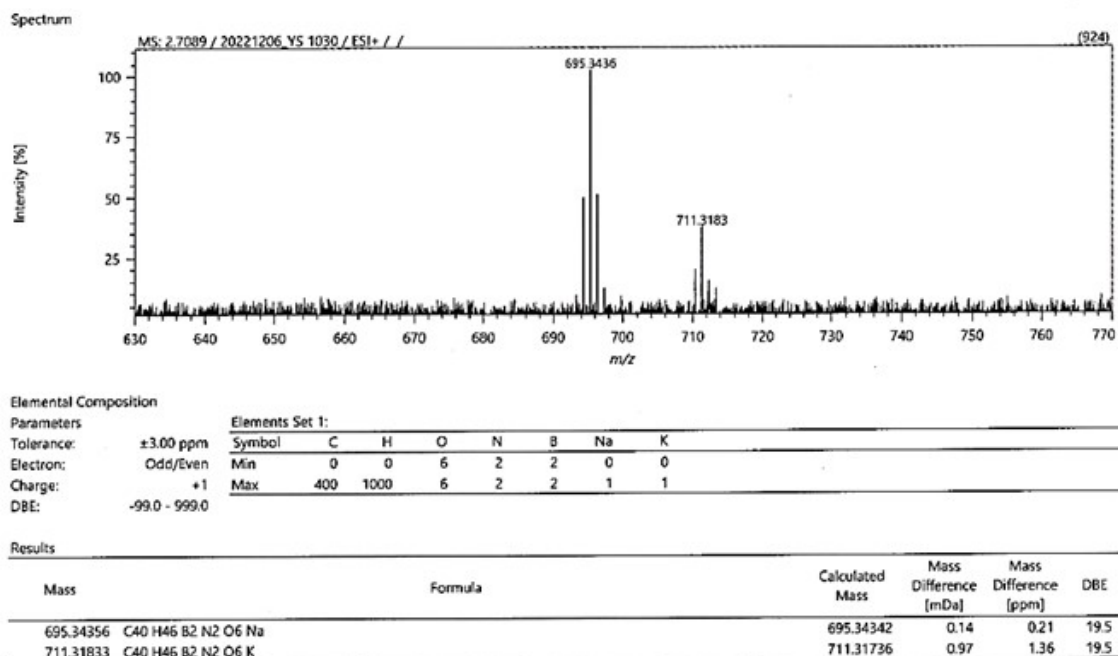

**Figure S16.** HRMS (ESI, positive ion)  $[\text{M} + \text{Na}]^+$  spectrum of compound **a4**

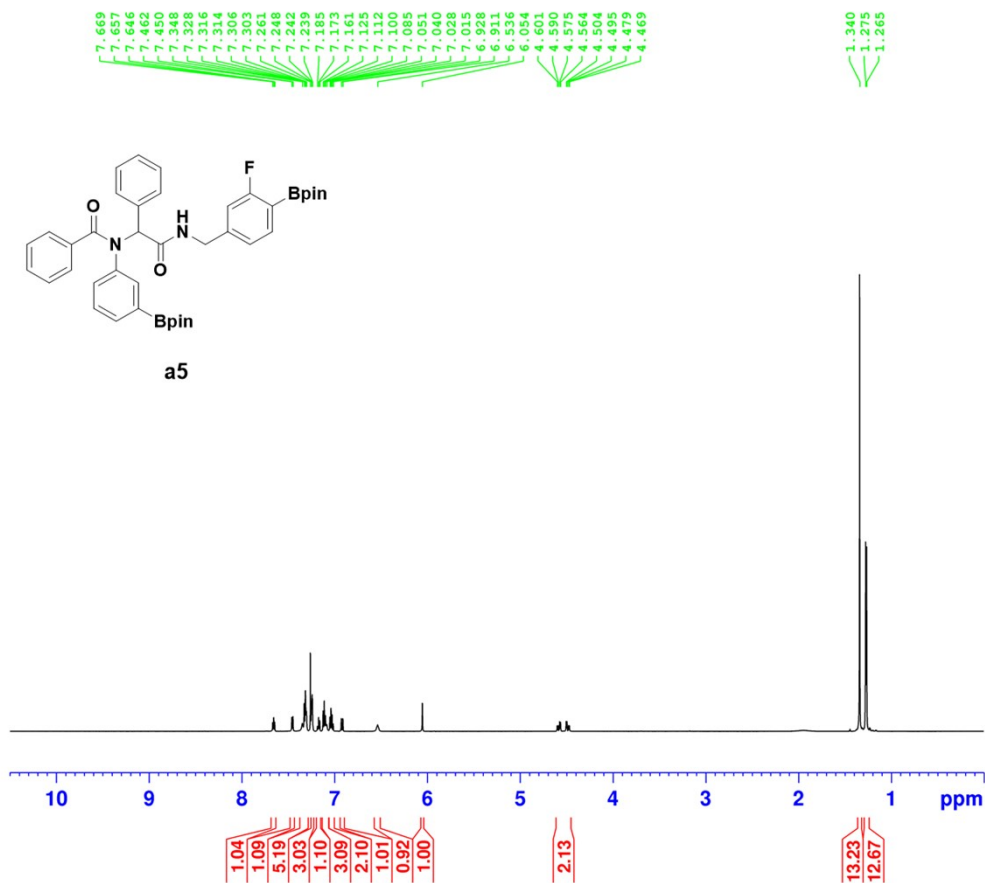

Figure S17. <sup>1</sup>H NMR (600 MHz, CDCl<sub>3</sub>) spectrum of compound **a5**

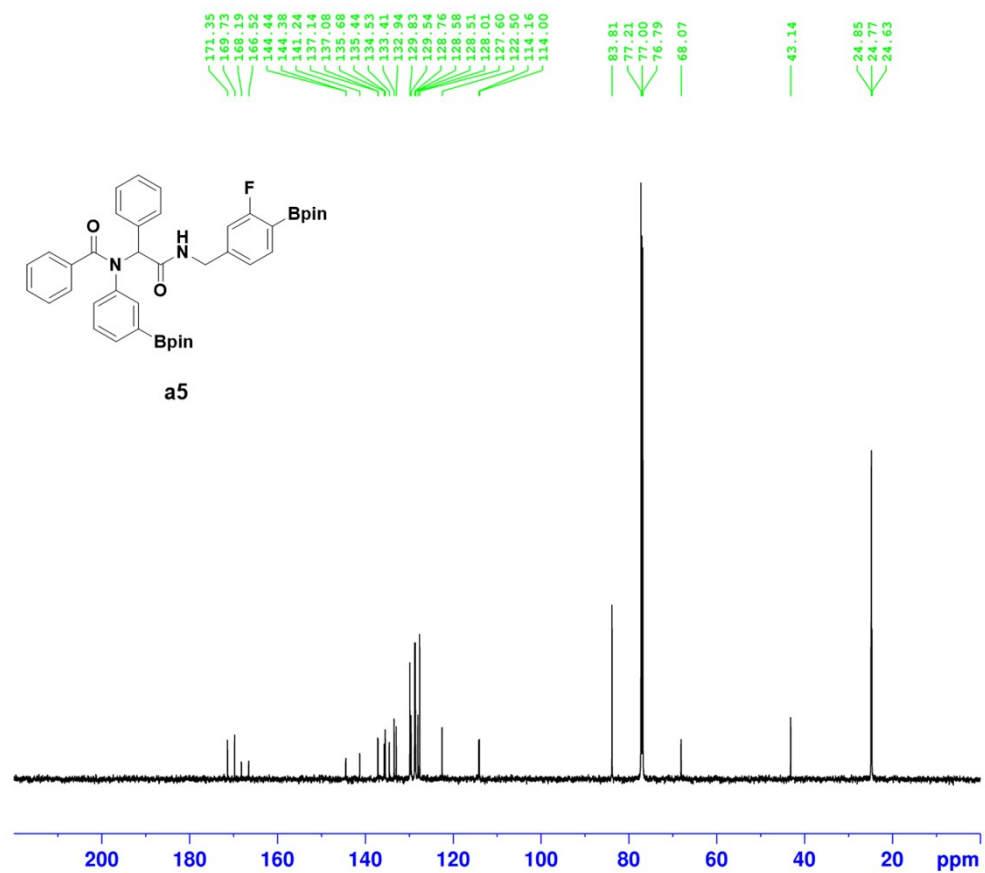

Figure S18. <sup>13</sup>C NMR (150 MHz, CDCl<sub>3</sub>) spectrum of compound **a5**



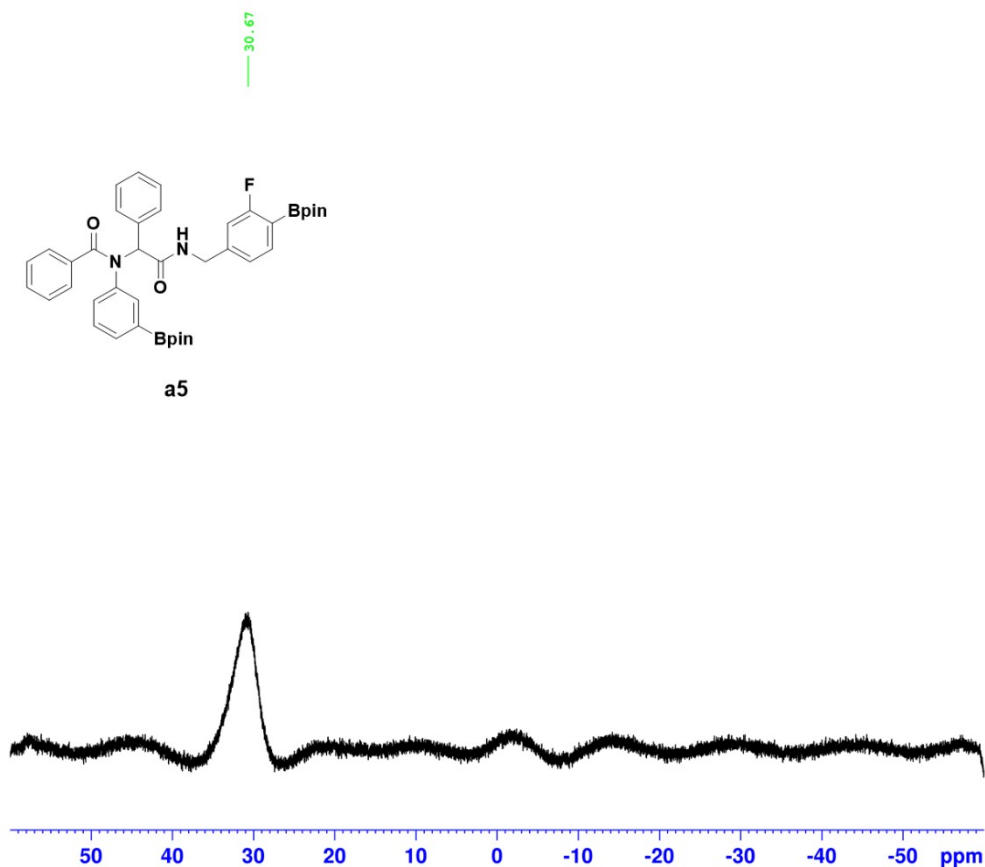

Figure S19.  $^{11}\text{B}$  NMR (192.5 MHz,  $\text{CDCl}_3$ ) spectrum of compound a5

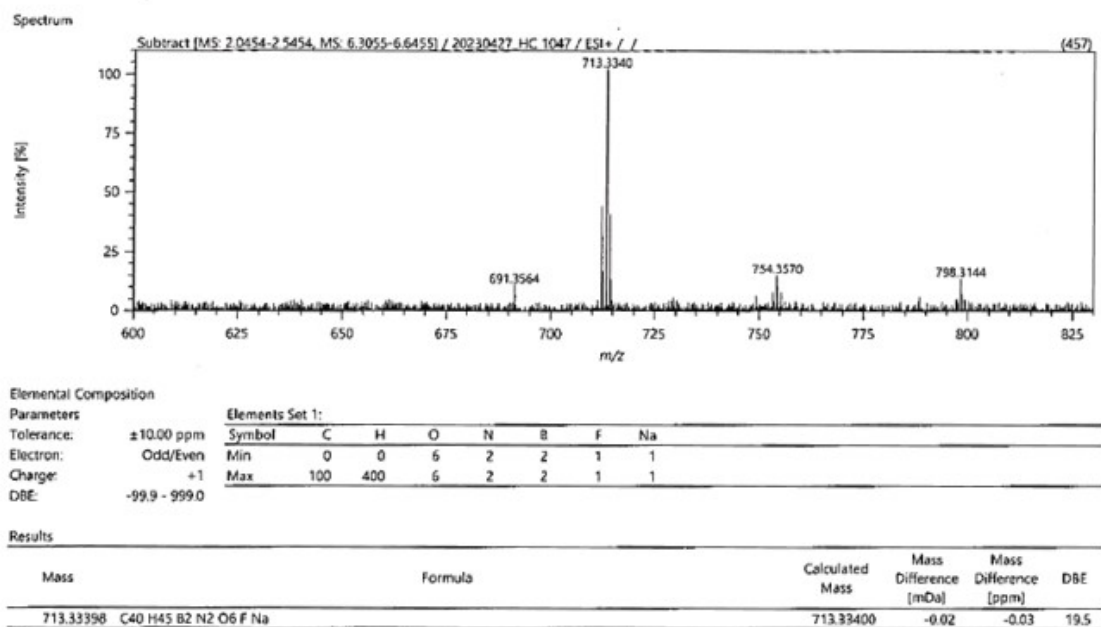

Figure S20. HRMS (ESI, positive ion)  $[\text{M} + \text{Na}]^+$  spectrum of compound a5

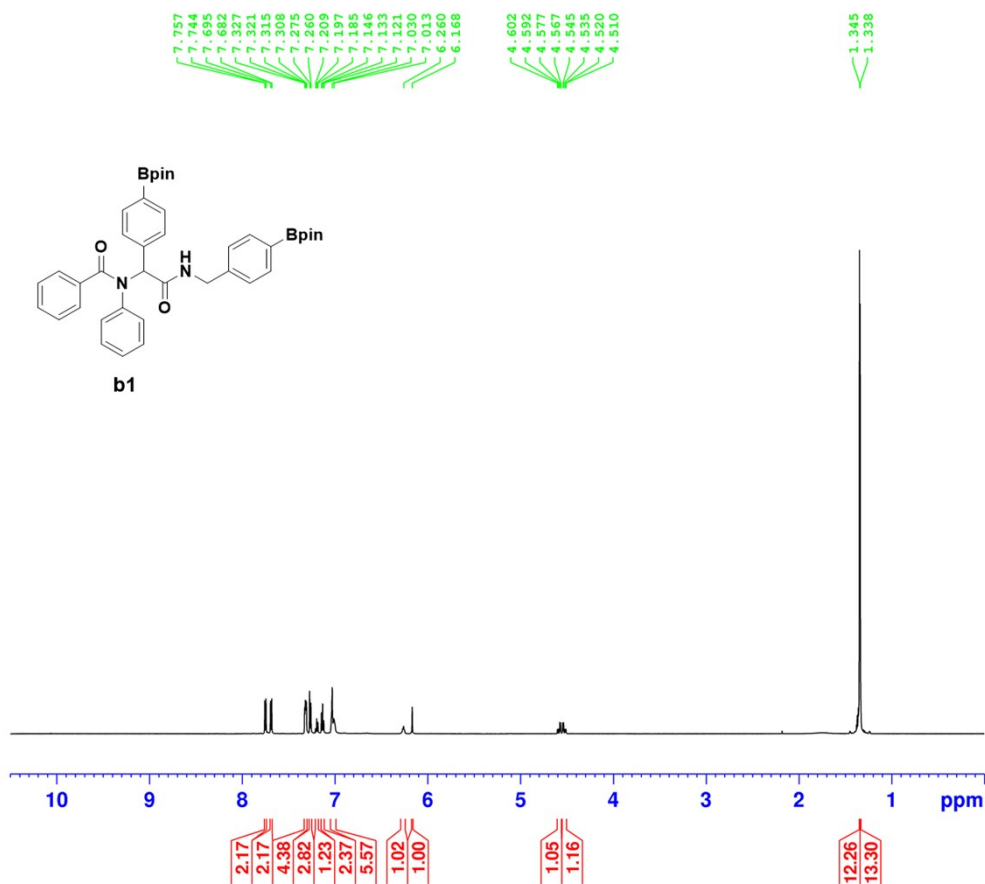

**Figure S21.** <sup>1</sup>H NMR (600 MHz, CDCl<sub>3</sub>) spectrum of compound **b1**

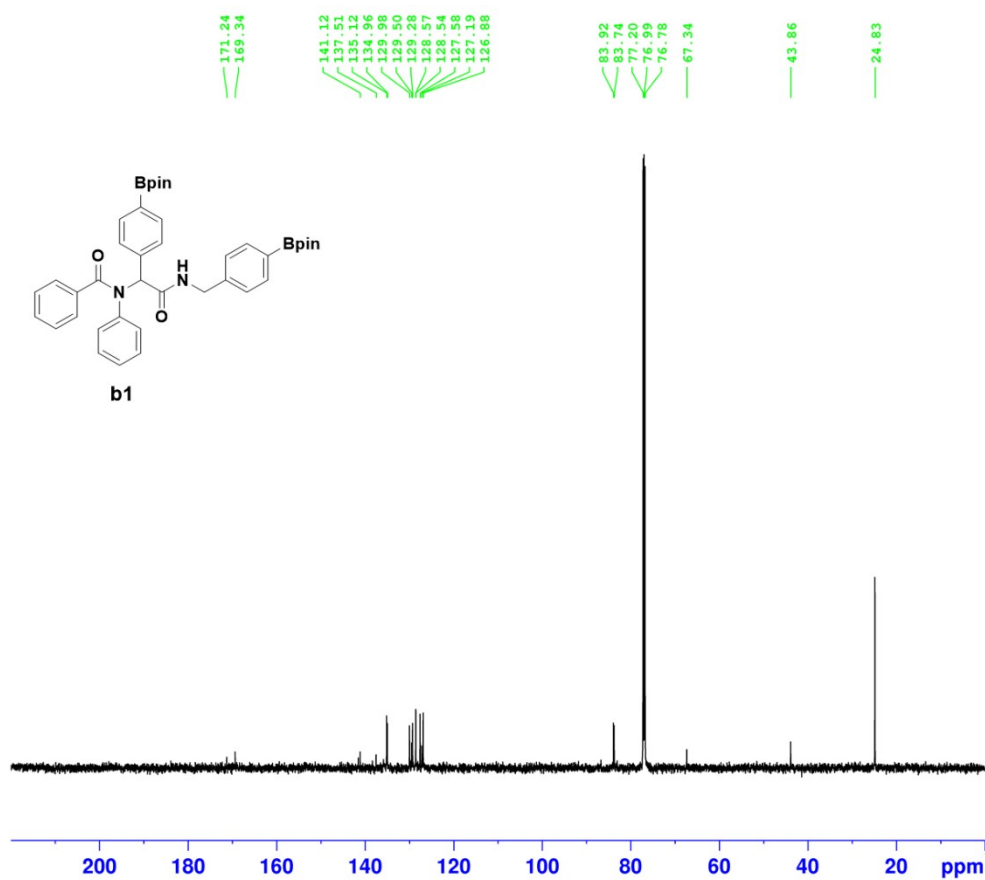

**Figure S22.** <sup>13</sup>C NMR (150 MHz, CDCl<sub>3</sub>) spectrum of compound **b1**

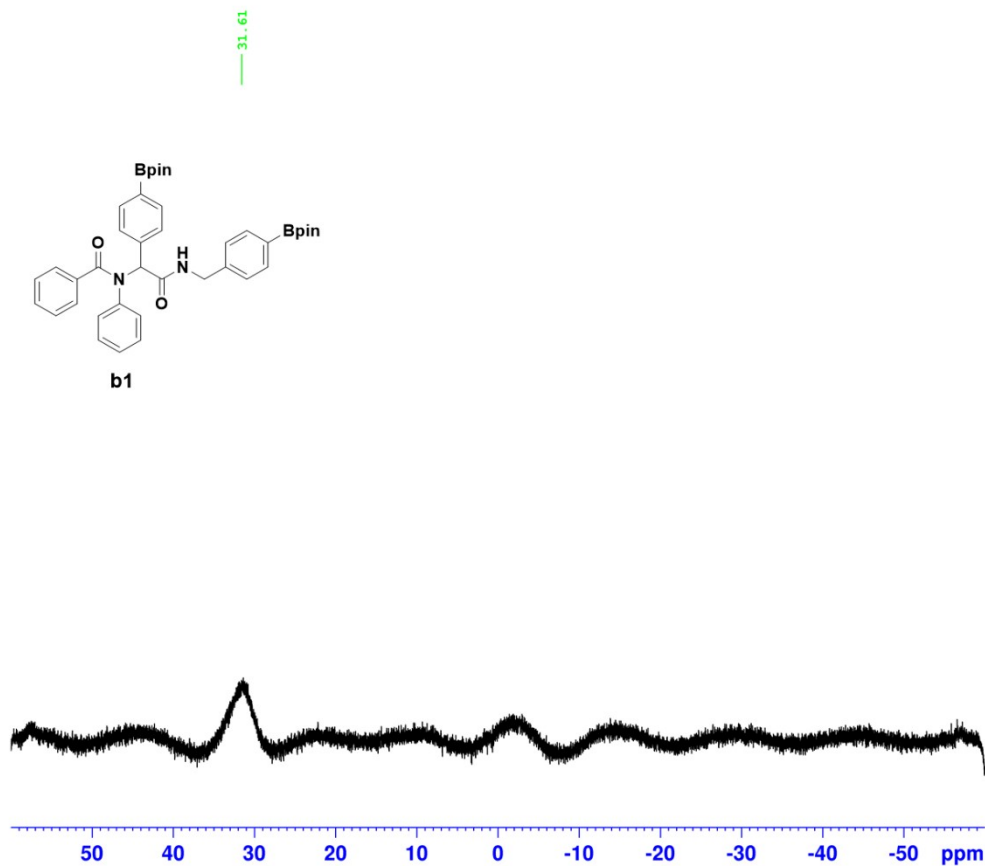

Figure S23.  $^{11}\text{B}$  NMR (192.5 MHz,  $\text{CDCl}_3$ ) spectrum of compound **b1**

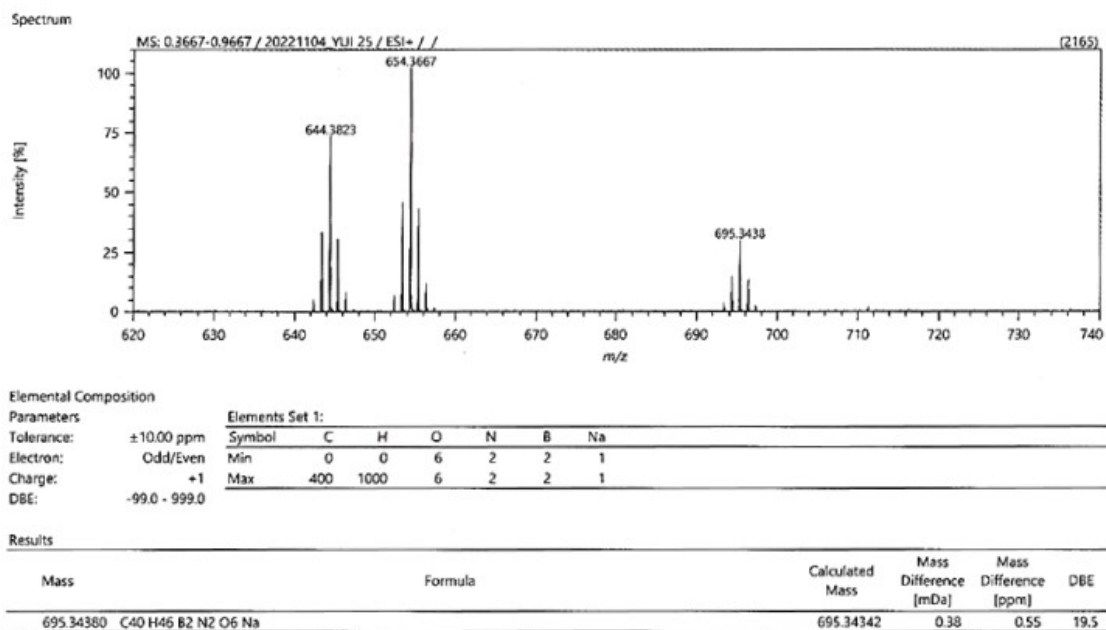

Figure S24. HRMS (ESI, positive ion)  $[\text{M} + \text{Na}]^+$  spectrum of compound **b1**

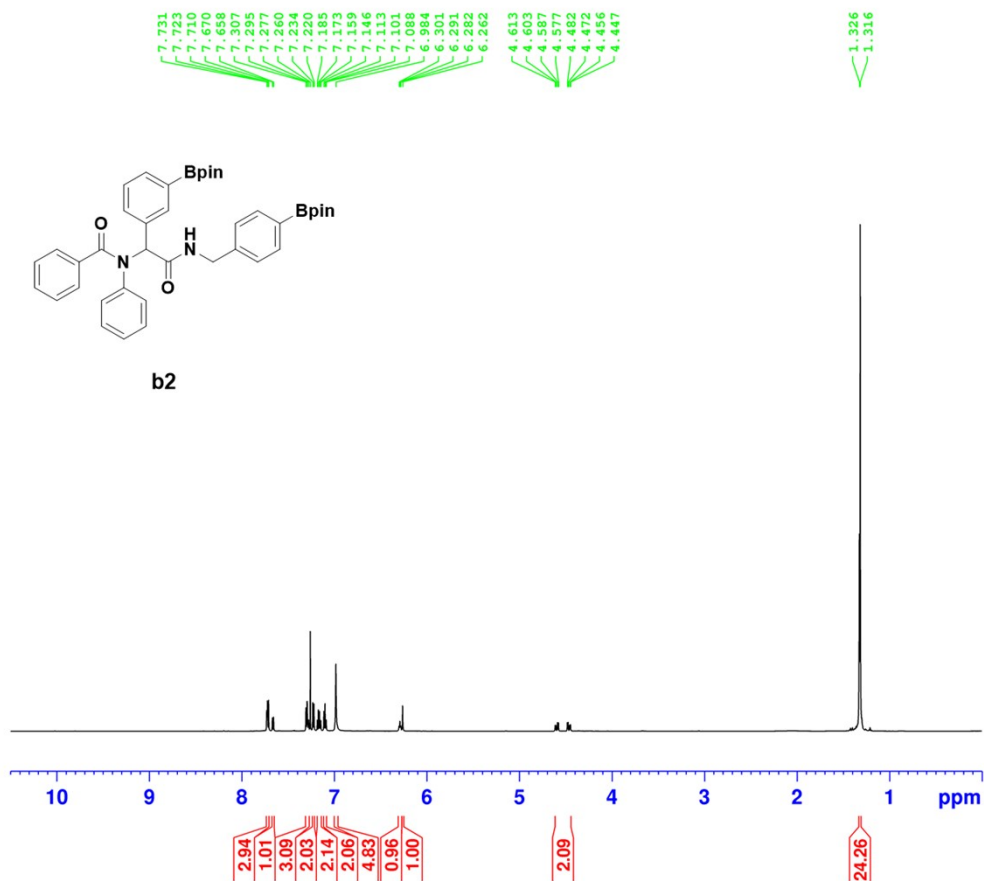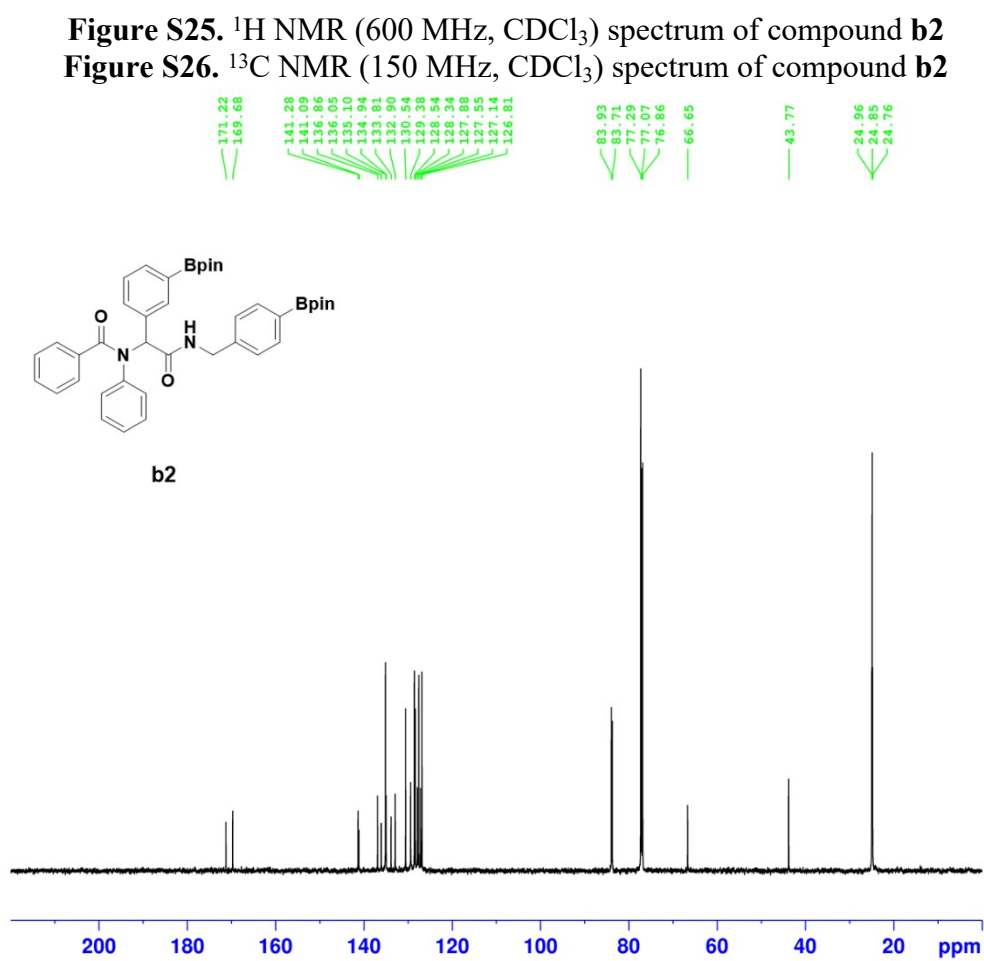

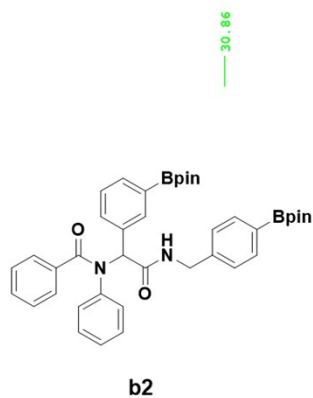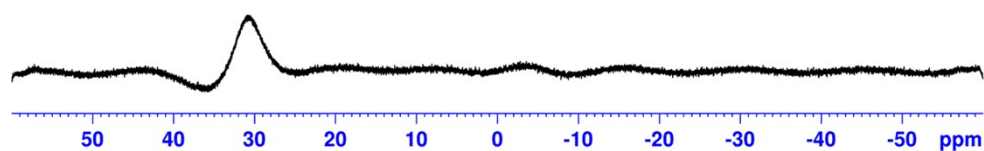

**Figure S27.** <sup>11</sup>B NMR (192.5 MHz, CDCl<sub>3</sub>) spectrum of compound **b2**

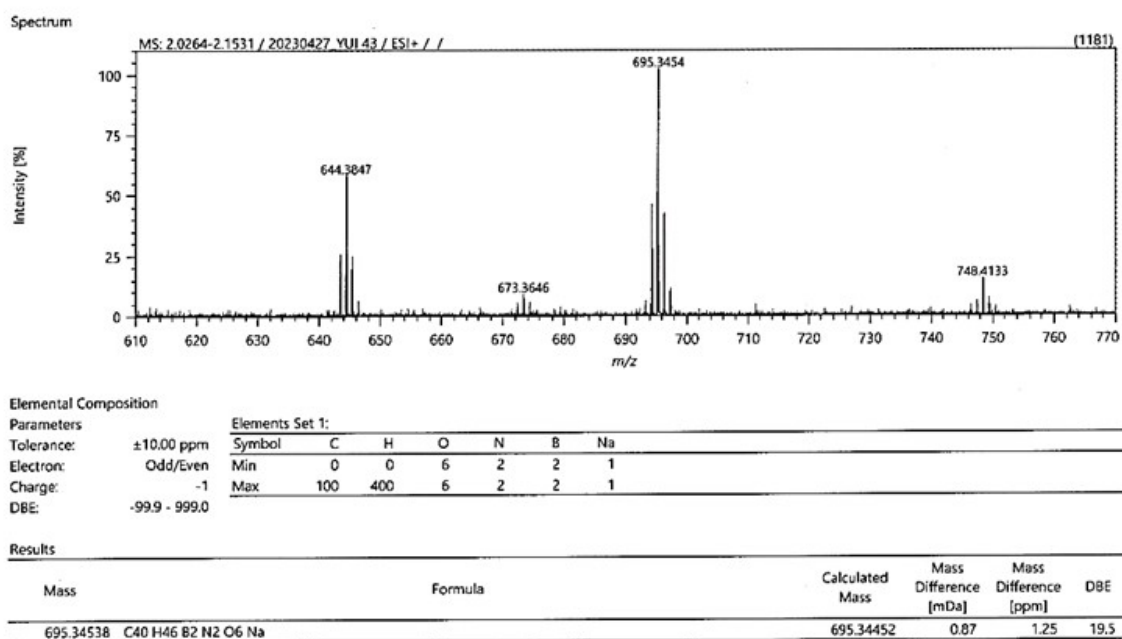

**Figure S28.** HRMS (ESI, positive ion) [M + Na]<sup>+</sup> spectrum of compound **b2**

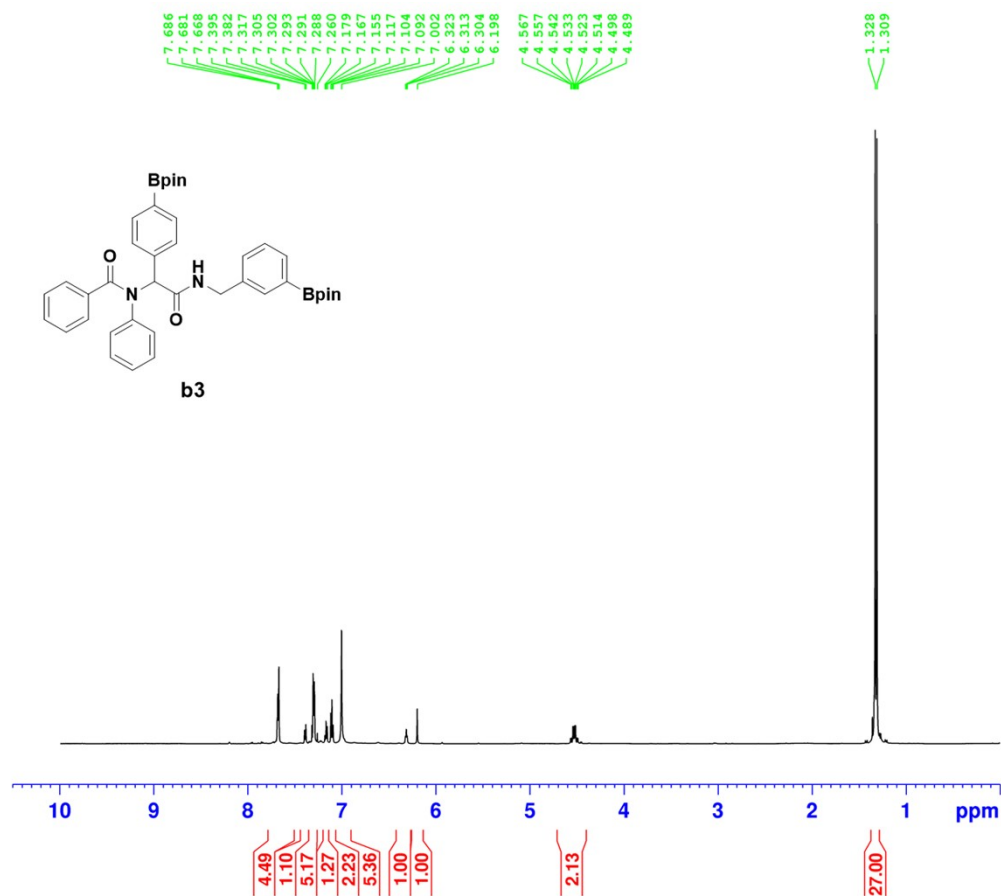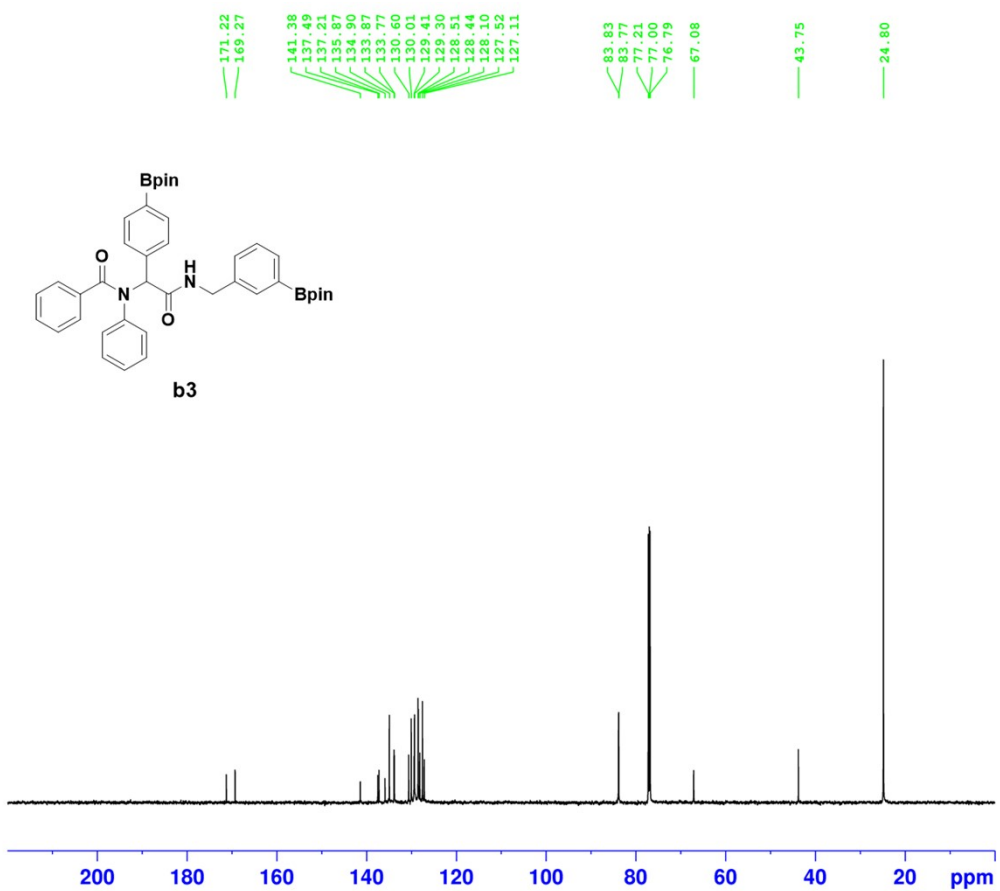

Figure S29. <sup>1</sup>H NMR (600 MHz, CDCl<sub>3</sub>) spectrum of compound **b3**

**Figure S30.**  $^{13}\text{C}$  NMR (150 MHz,  $\text{CDCl}_3$ ) spectrum of compound **b3**

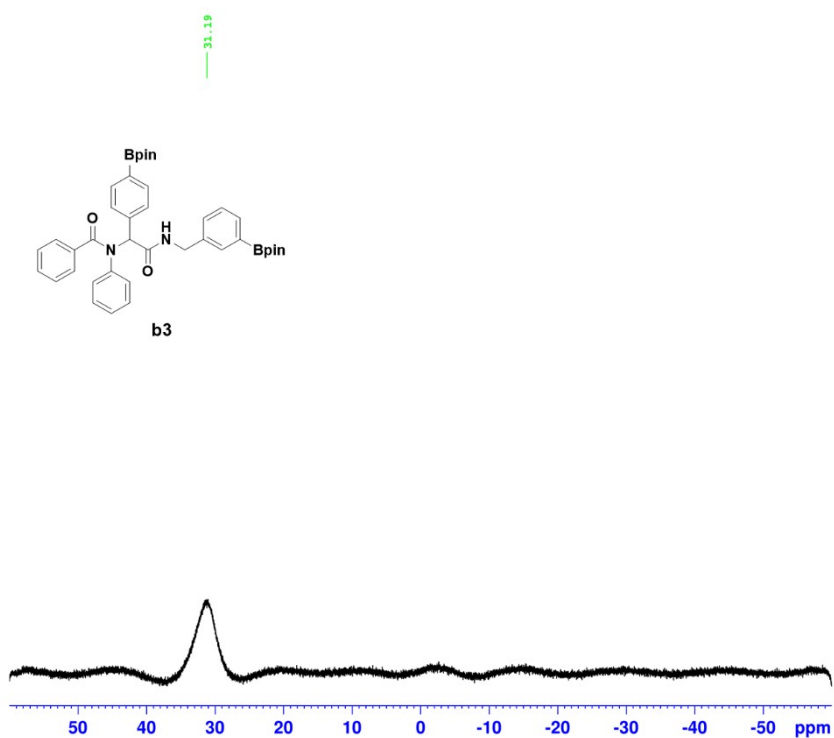

**Figure S31.**  $^{11}\text{B}$  NMR (192.5 MHz,  $\text{CDCl}_3$ ) spectrum of compound **b3**

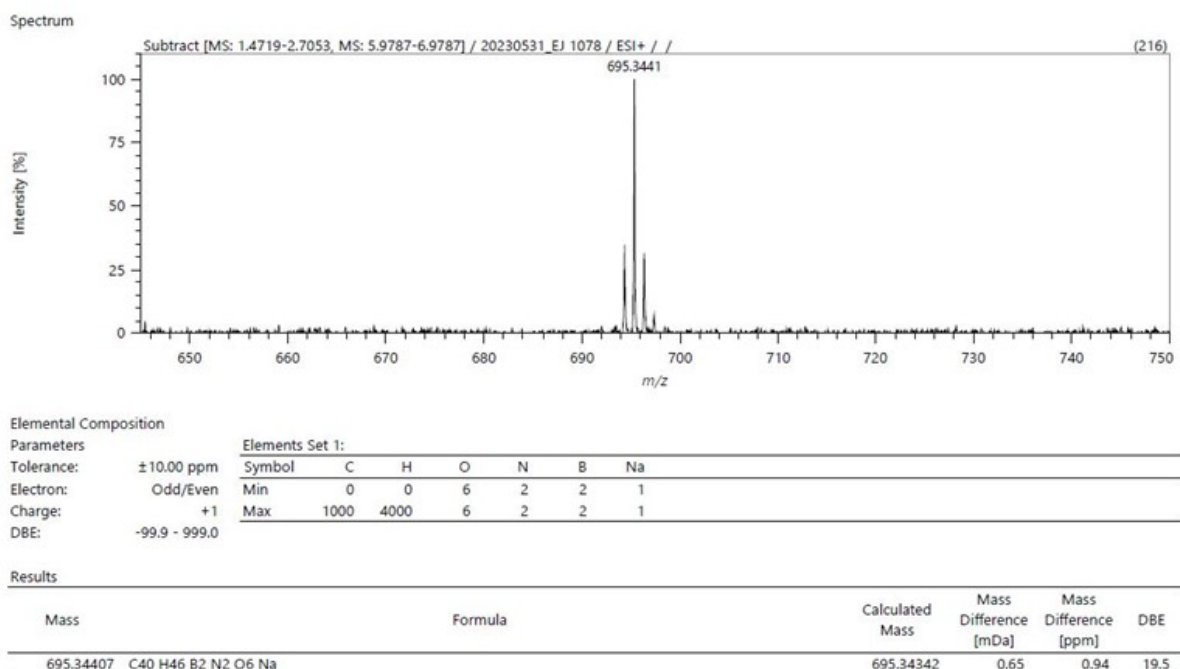

**Figure S32.** HRMS (ESI, positive ion)  $[\text{M} + \text{Na}]^+$  spectrum of compound **b3**





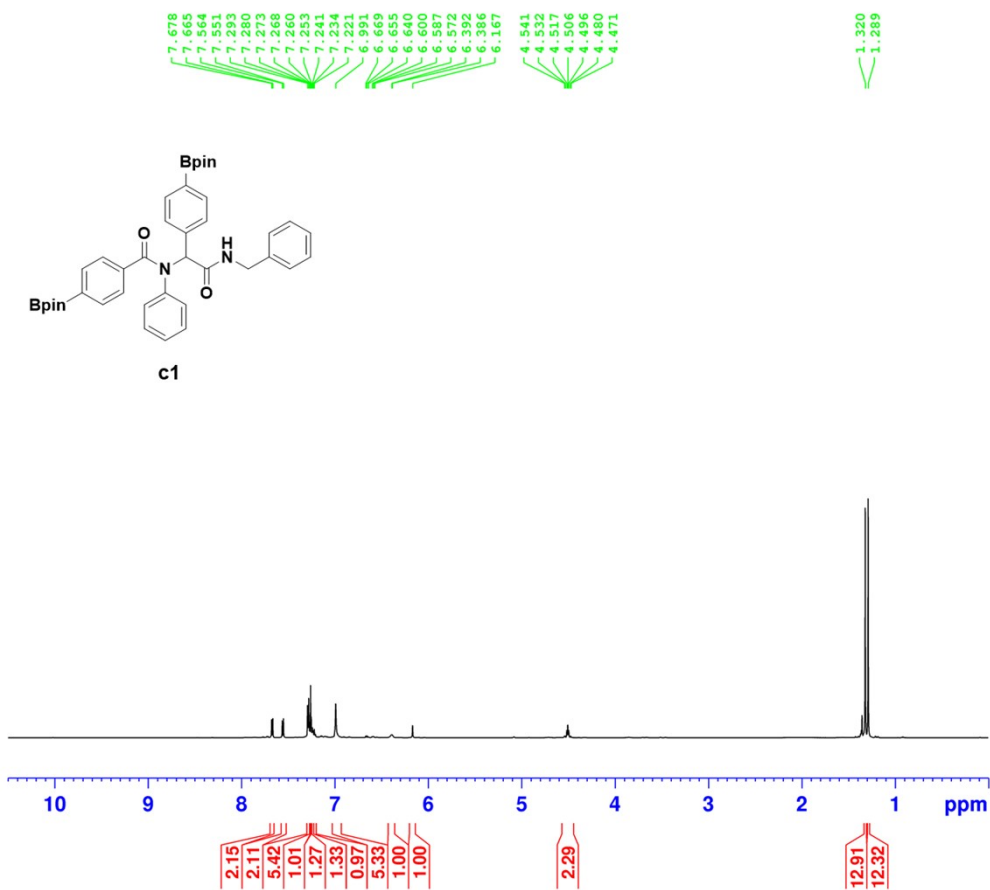

Figure S33. <sup>1</sup>H NMR (600 MHz, CDCl<sub>3</sub>) spectrum of compound **c1**

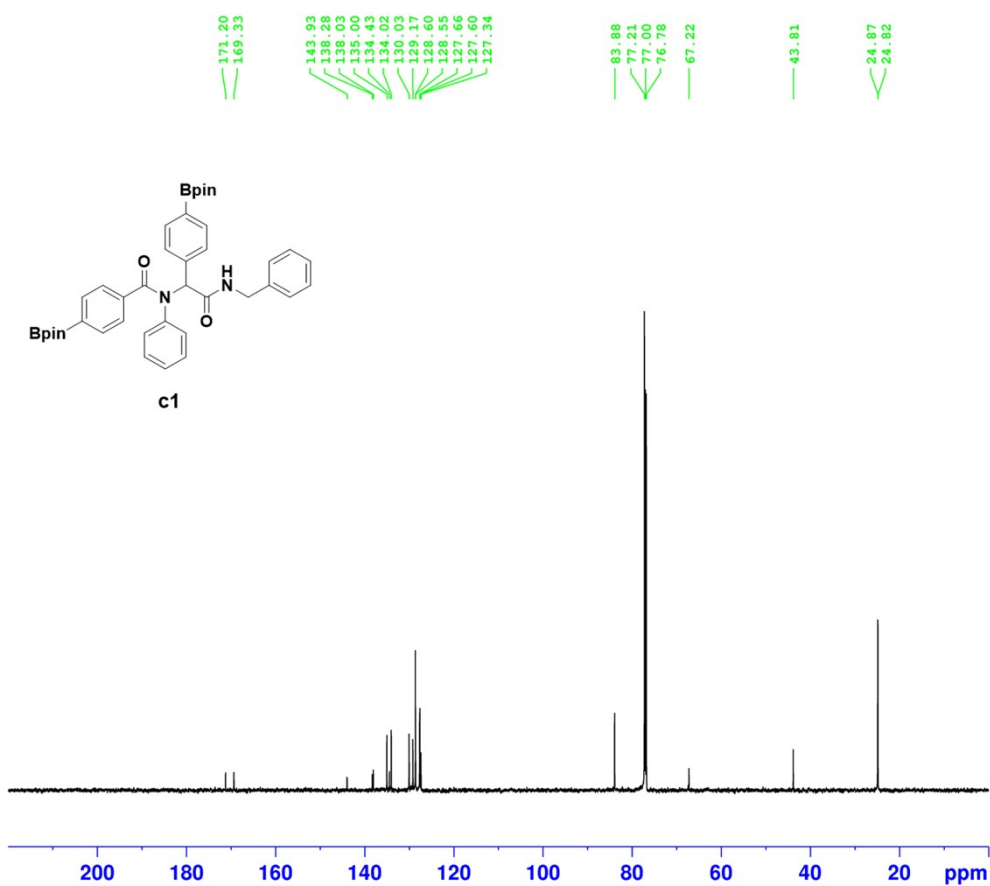

Figure S34. <sup>13</sup>C NMR (150 MHz, CDCl<sub>3</sub>) spectrum of compound **c1**

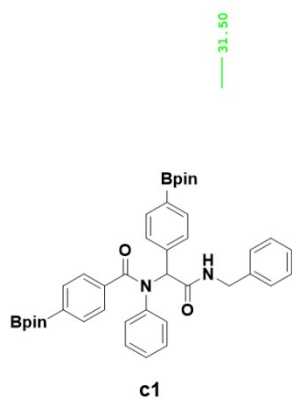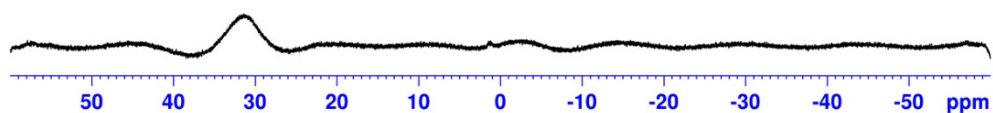

**Figure S35.**  $^{11}\text{B}$  NMR (192.5 MHz,  $\text{CDCl}_3$ ) spectrum of compound **c1**

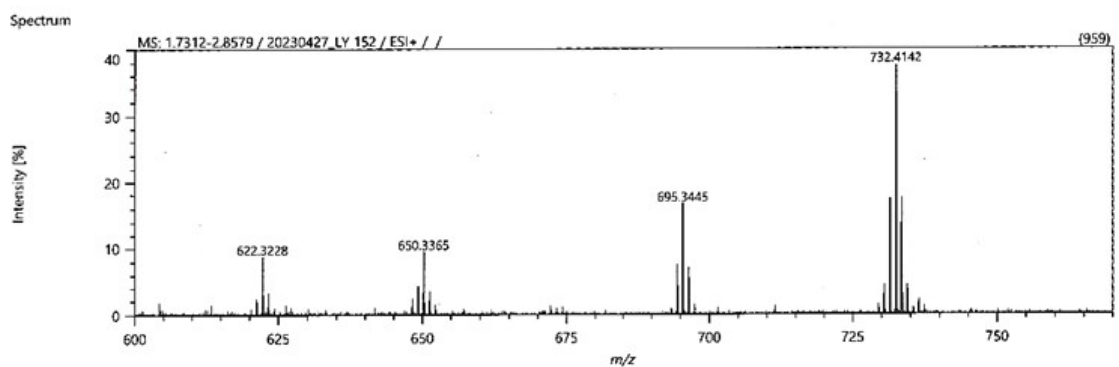

Elemental Composition

Parameters

Tolerance:  $\pm 10.00$  ppm  
 Electron: Odd/Even  
 Charge: -1  
 DBE: -99.9 - 999.0

Elements Set 1:

| Symbol | C   | H   | O | N | B | Na |
|--------|-----|-----|---|---|---|----|
| Min    | 0   | 0   | 6 | 2 | 2 | 1  |
| Max    | 100 | 400 | 6 | 2 | 2 | 1  |

Results

| Mass      | Formula                                                             | Calculated Mass | Mass Difference [mDa] | Mass Difference [ppm] | DBE  |
|-----------|---------------------------------------------------------------------|-----------------|-----------------------|-----------------------|------|
| 695.34451 | $\text{C}_{40}\text{H}_{46}\text{B}_2\text{N}_2\text{O}_6\text{Na}$ | 695.34452       | 0.00                  | -0.01                 | 19.5 |

**Figure S36.** HRMS (ESI, positive ion)  $[\text{M} + \text{Na}]^+$  spectrum of compound **c1**

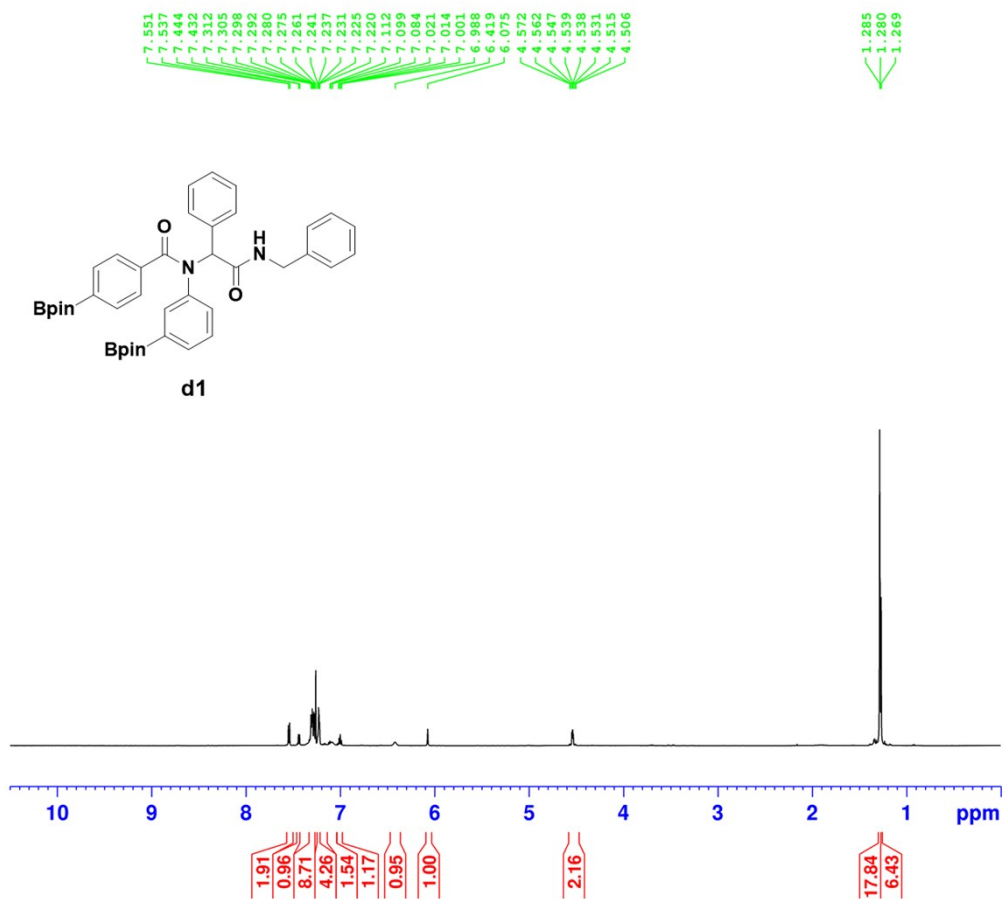

Figure S37. <sup>1</sup>H NMR (600 MHz, CDCl<sub>3</sub>) spectrum of compound **d1**

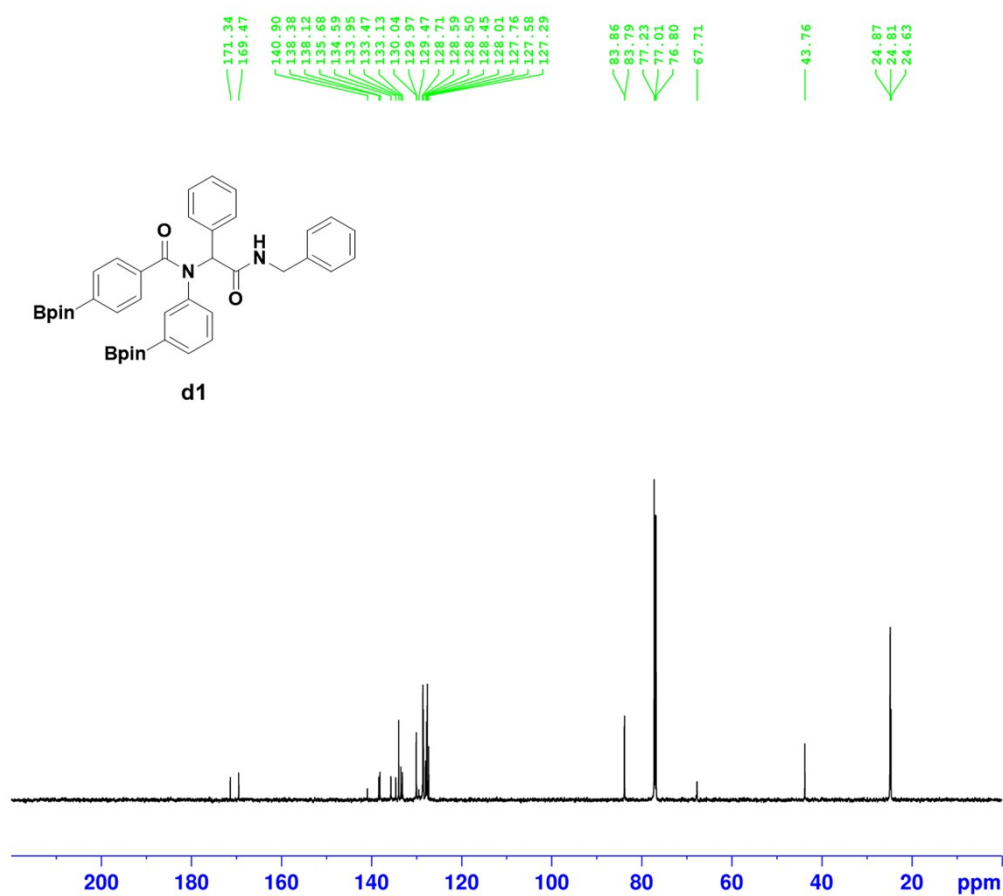

Figure S38. <sup>13</sup>C NMR (150 MHz, CDCl<sub>3</sub>) spectrum of compound **d1**

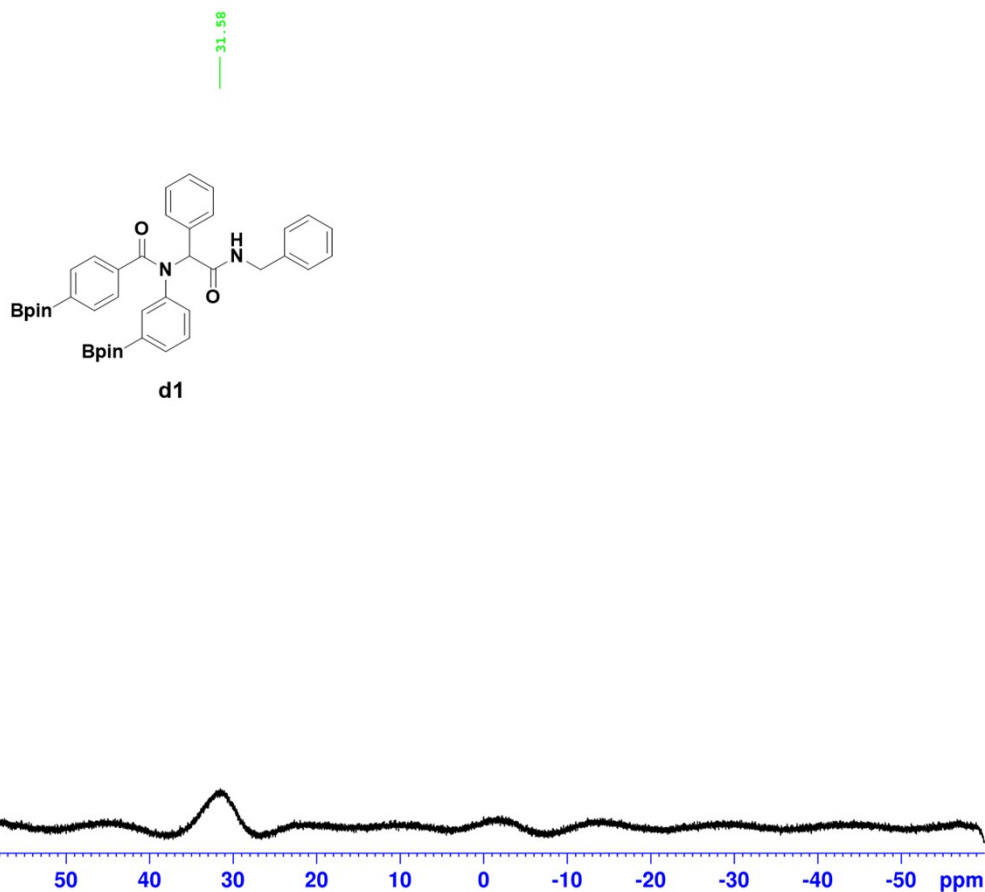

**Figure S39.**  $^{11}\text{B}$  NMR (192.5 MHz,  $\text{CDCl}_3$ ) spectrum of compound **d1**

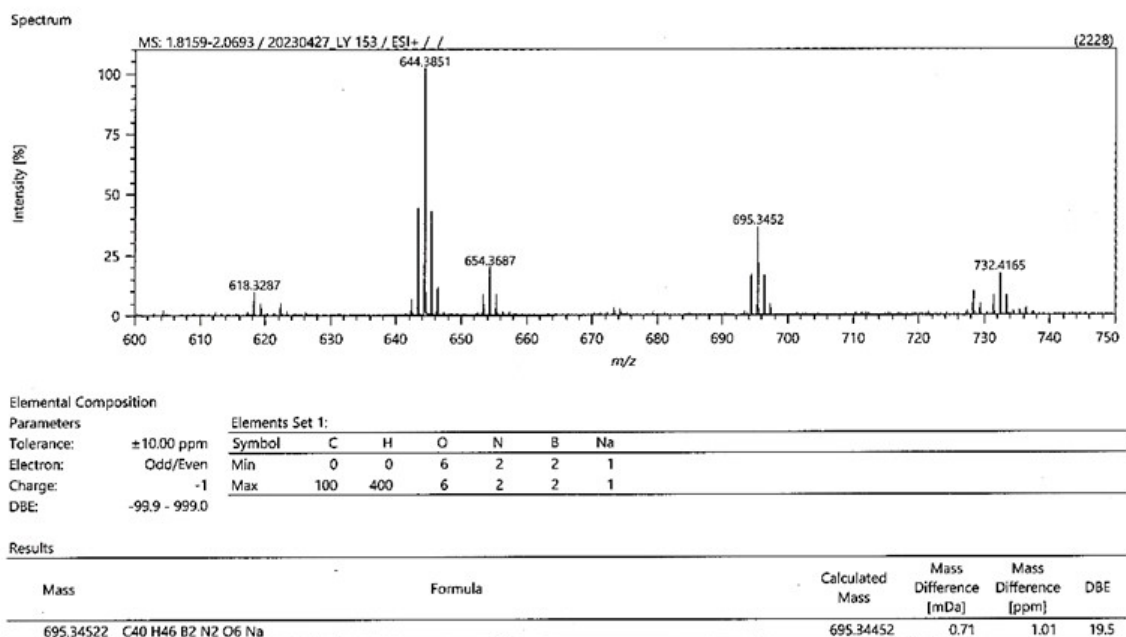

**Figure S40.** HRMS (ESI, positive ion)  $[\text{M} + \text{Na}]^+$  spectrum of compound **d1**

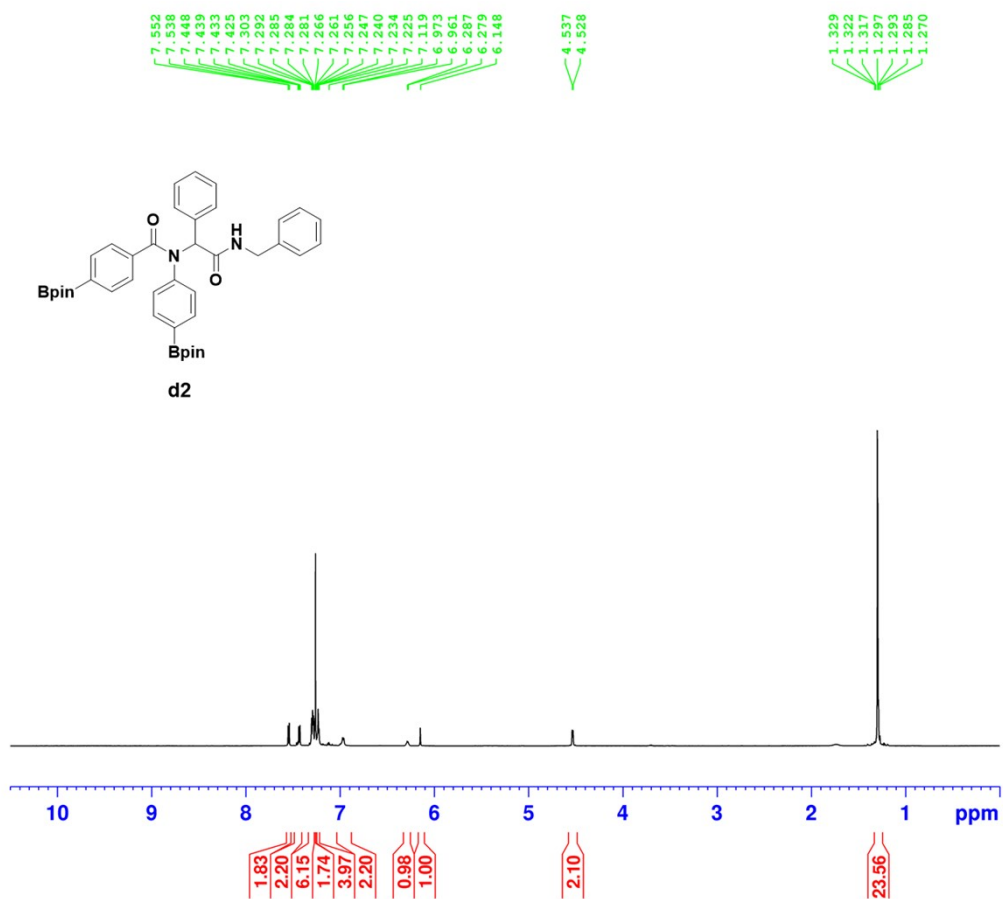

**Figure S41.** <sup>1</sup>H NMR (600 MHz, CDCl<sub>3</sub>) spectrum of compound **d2**

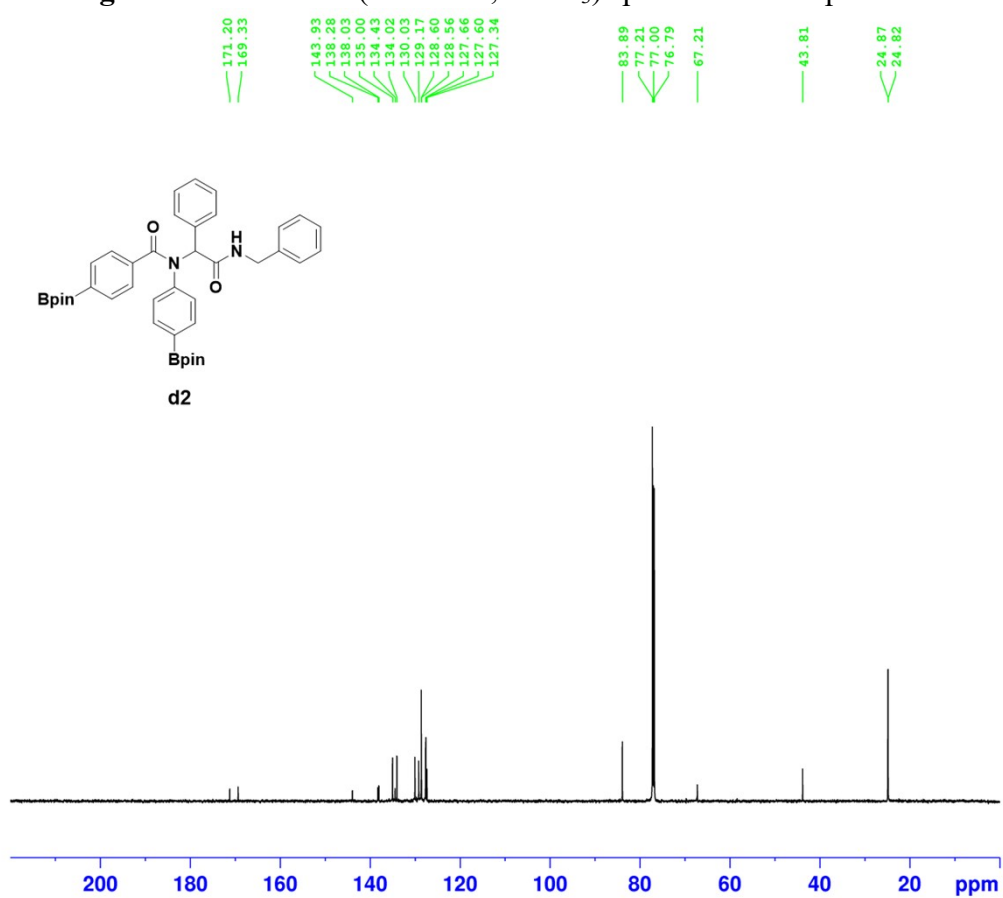

**Figure S42.** <sup>13</sup>C NMR (150 MHz, CDCl<sub>3</sub>) spectrum of compound **d2**

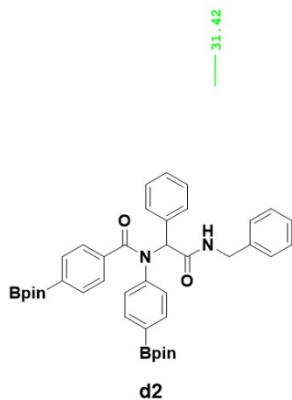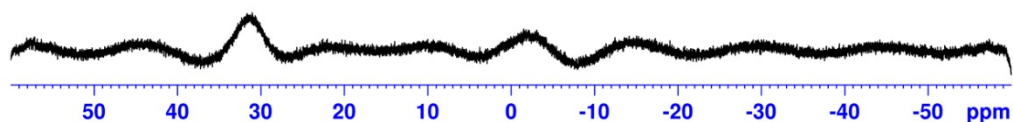

Figure S43.  $^{11}\text{B}$  NMR (192.5 MHz,  $\text{CDCl}_3$ ) spectrum of compound **d2**

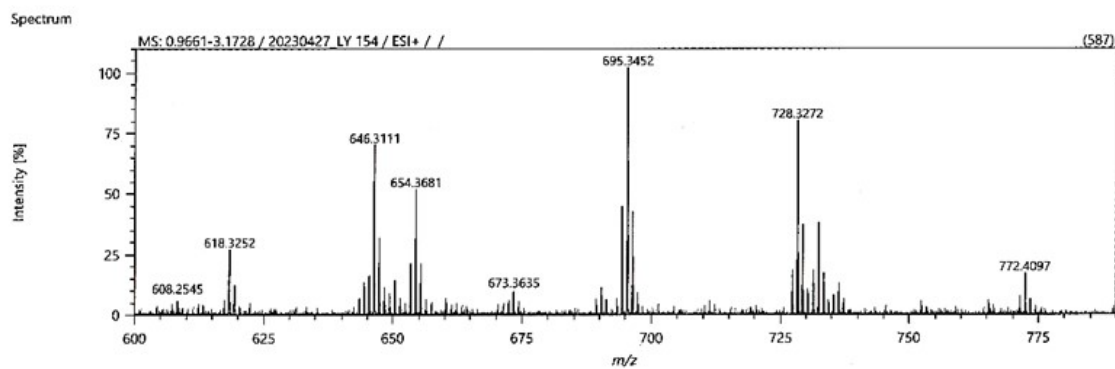

Elemental Composition

Parameters

Tolerance:  $\pm 10.00$  ppm  
 Electron: Odd/Even  
 Charge: -1  
 DBE: -99.9 - 999.0

Elements Set 1:

| Symbol | C   | H   | O | N | B | Na |
|--------|-----|-----|---|---|---|----|
| Min    | 0   | 0   | 6 | 2 | 2 | 1  |
| Max    | 100 | 400 | 6 | 2 | 2 | 1  |

Results

| Mass      | Formula                                                             | Calculated Mass | Mass Difference [mDa] | Mass Difference [ppm] | DBE  |
|-----------|---------------------------------------------------------------------|-----------------|-----------------------|-----------------------|------|
| 695.34518 | $\text{C}_{40}\text{H}_{46}\text{B}_2\text{N}_2\text{O}_6\text{Na}$ | 695.34452       | 0.67                  | 0.96                  | 19.5 |

Figure S44. HRMS (ESI, positive ion)  $[\text{M} + \text{Na}]^+$  spectrum of compound **d2**

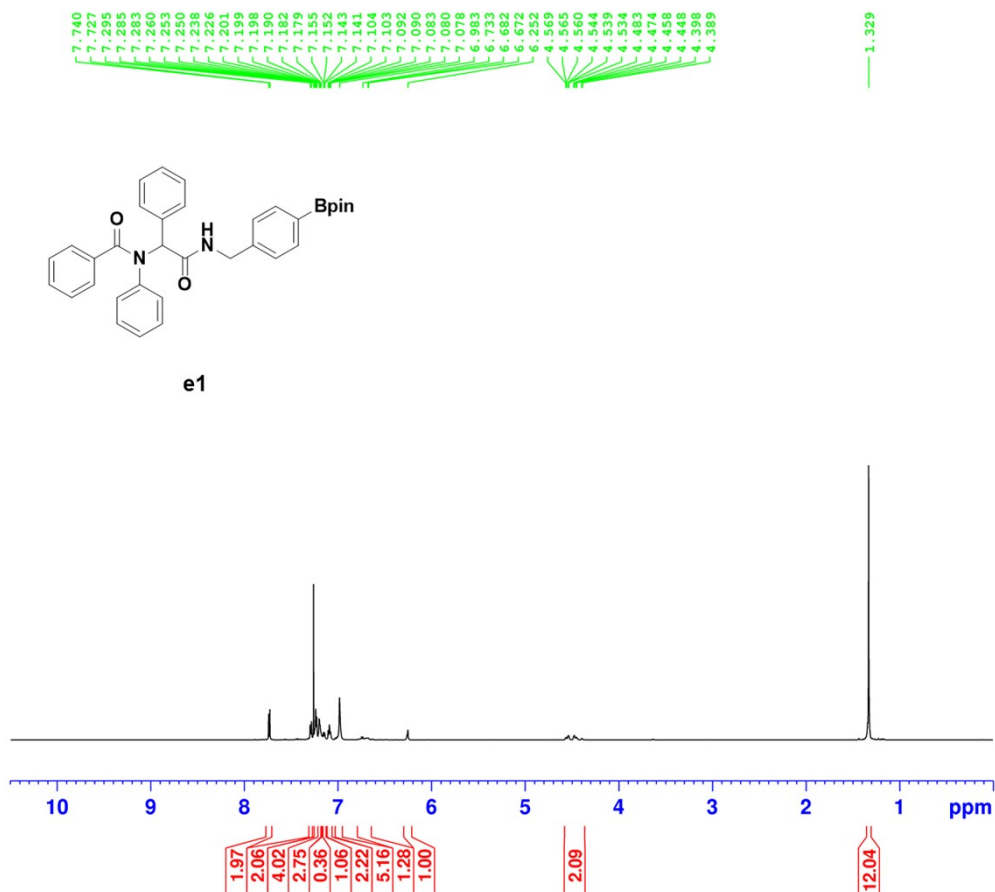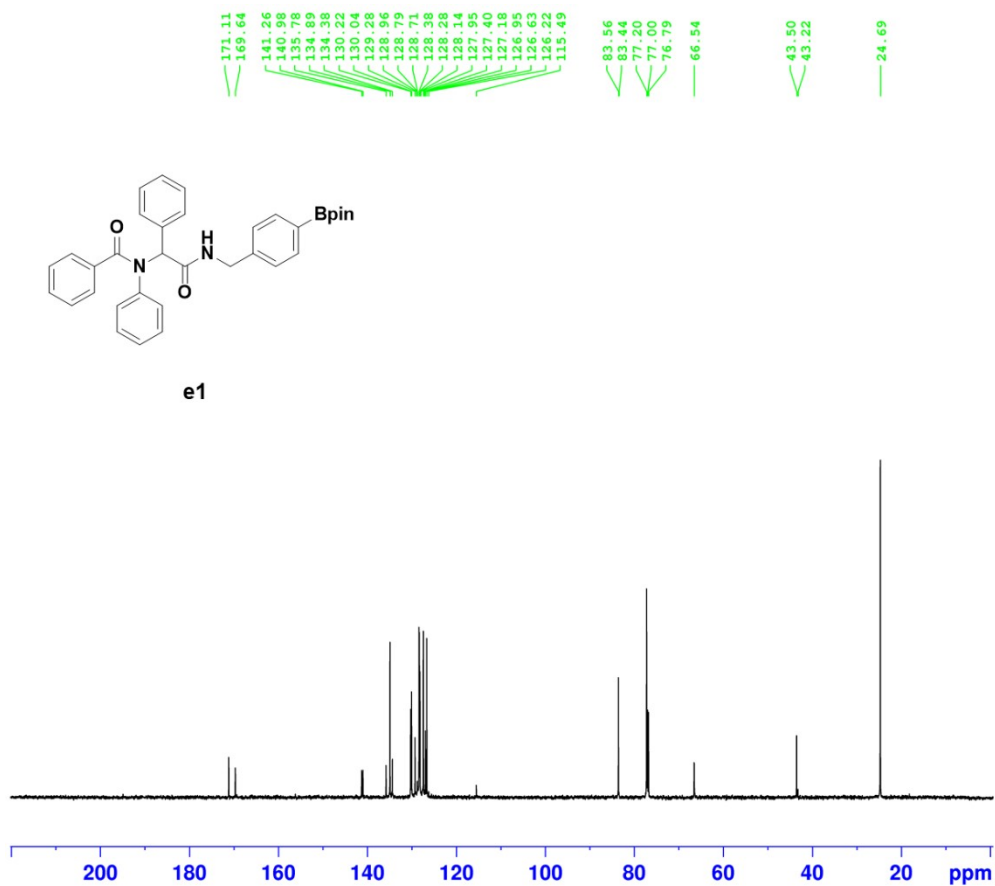

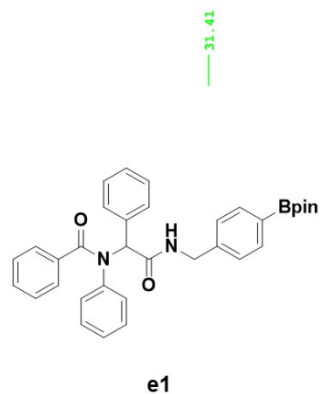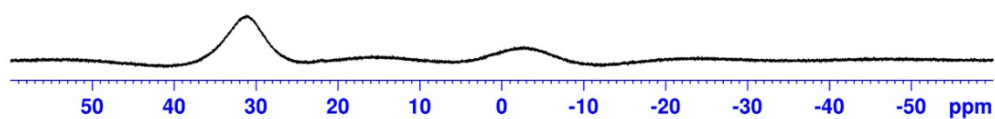

**Figure S47.** <sup>11</sup>B NMR (192.5 MHz, CDCl<sub>3</sub>) spectrum of compound **e1**

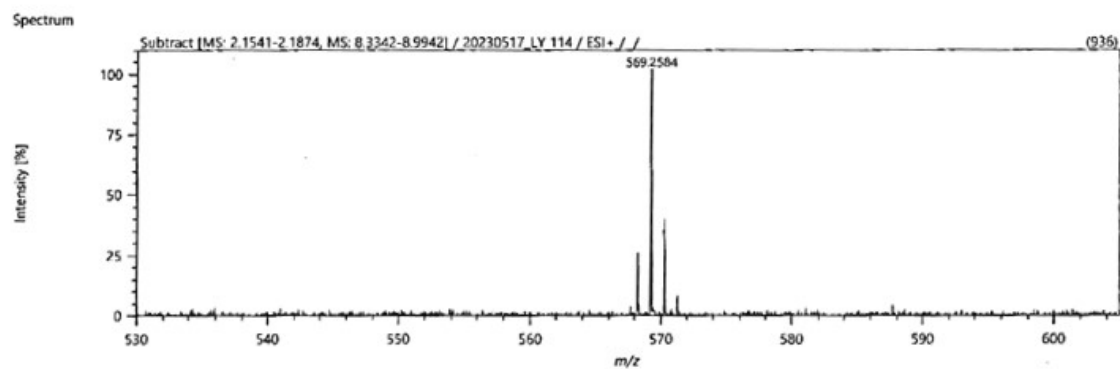

Elemental Composition

Parameters

Tolerance: ± 10.00 ppm  
 Electron: Odd/Even  
 Charge: +1  
 DBE: -99.9 - 999.0

Elements Set 1:

| Symbol | C    | H    | O | N | B | Na |
|--------|------|------|---|---|---|----|
| Min    | 0    | 0    | 4 | 2 | 1 | 1  |
| Max    | 1000 | 4000 | 4 | 2 | 1 | 1  |

Results

| Mass      | Formula                                                            | Calculated Mass | Mass Difference [mDa] | Mass Difference [ppm] | DBE  |
|-----------|--------------------------------------------------------------------|-----------------|-----------------------|-----------------------|------|
| 569.25839 | C <sub>34</sub> H <sub>35</sub> B N <sub>2</sub> O <sub>4</sub> Na | 569.25821       | 0.18                  | 0.31                  | 18.5 |

**Figure S48.** HRMS (ESI, positive ion) [M + Na]<sup>+</sup> spectrum of compound **e1**



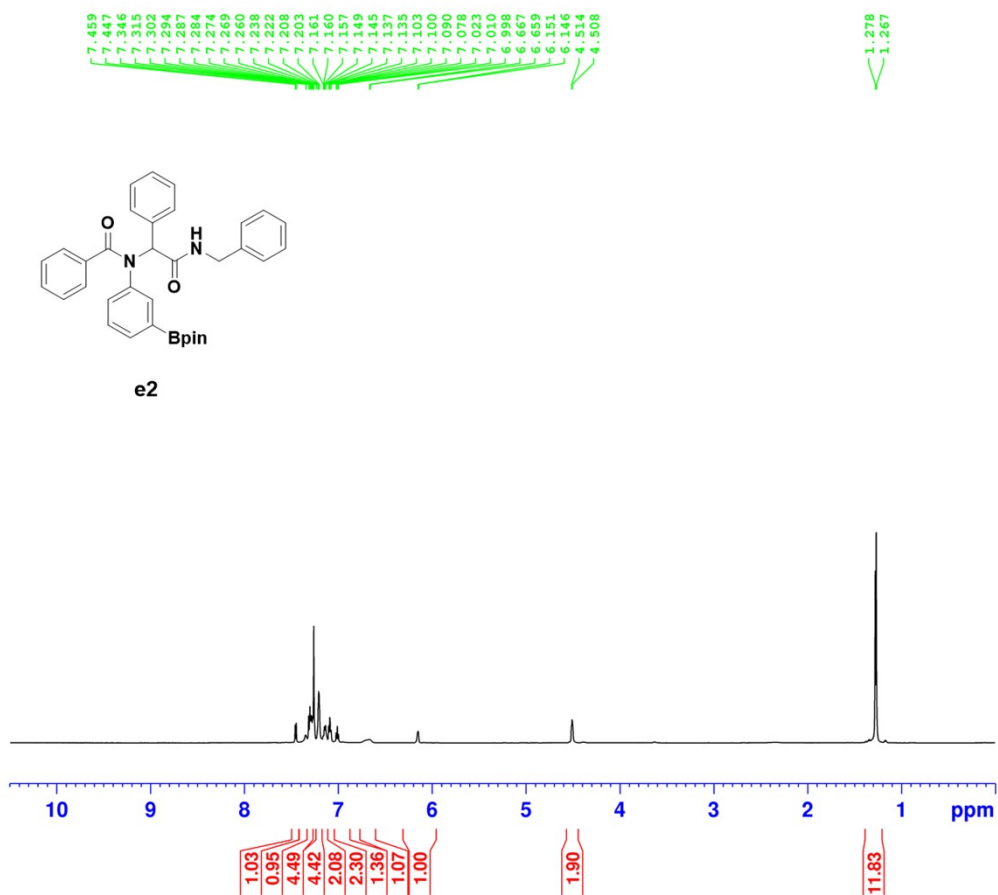

Figure S49. <sup>1</sup>H NMR (600 MHz, CDCl<sub>3</sub>) spectrum of compound **e2**

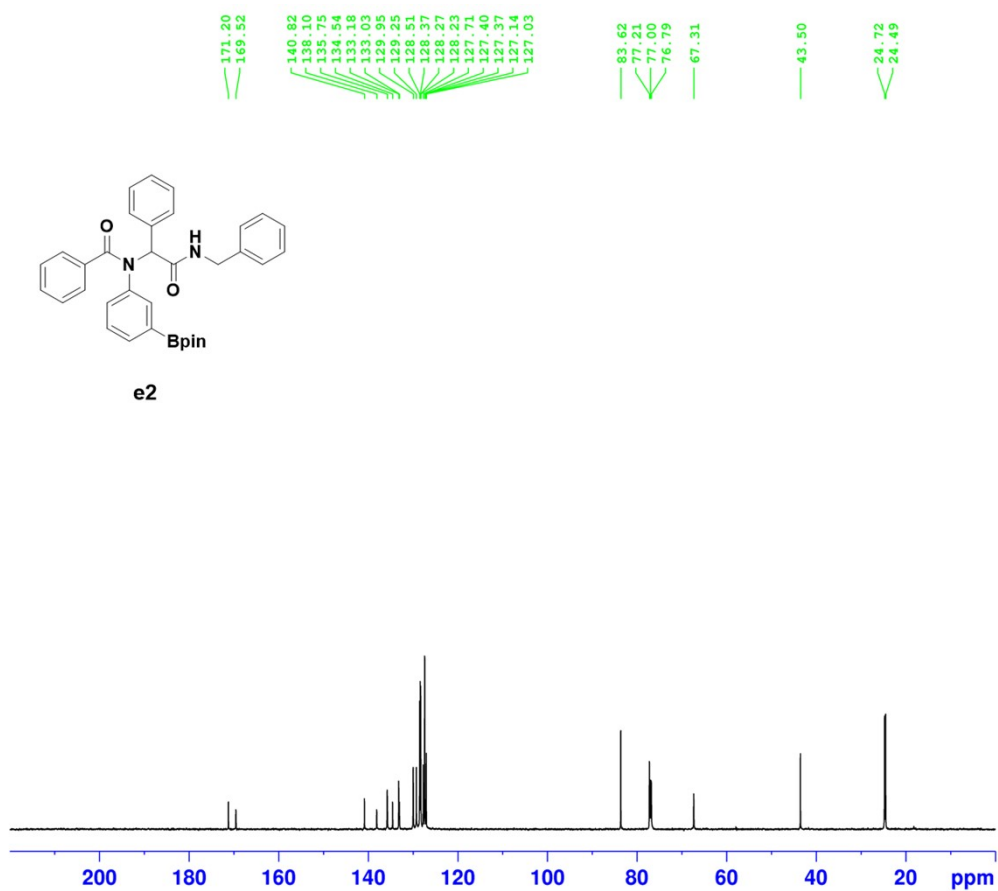

Figure S50. <sup>13</sup>C NMR (150 MHz, CDCl<sub>3</sub>) spectrum of compound **e2**

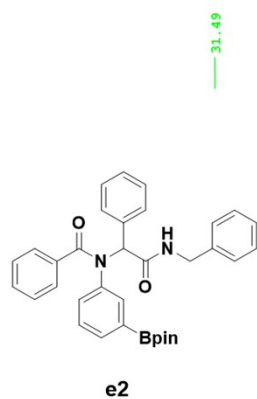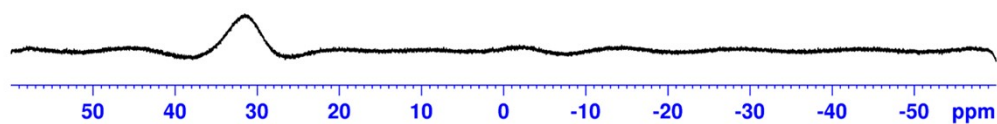

**Figure S51.**  $^{11}\text{B}$  NMR (192.5 MHz,  $\text{CDCl}_3$ ) spectrum of compound **e2**

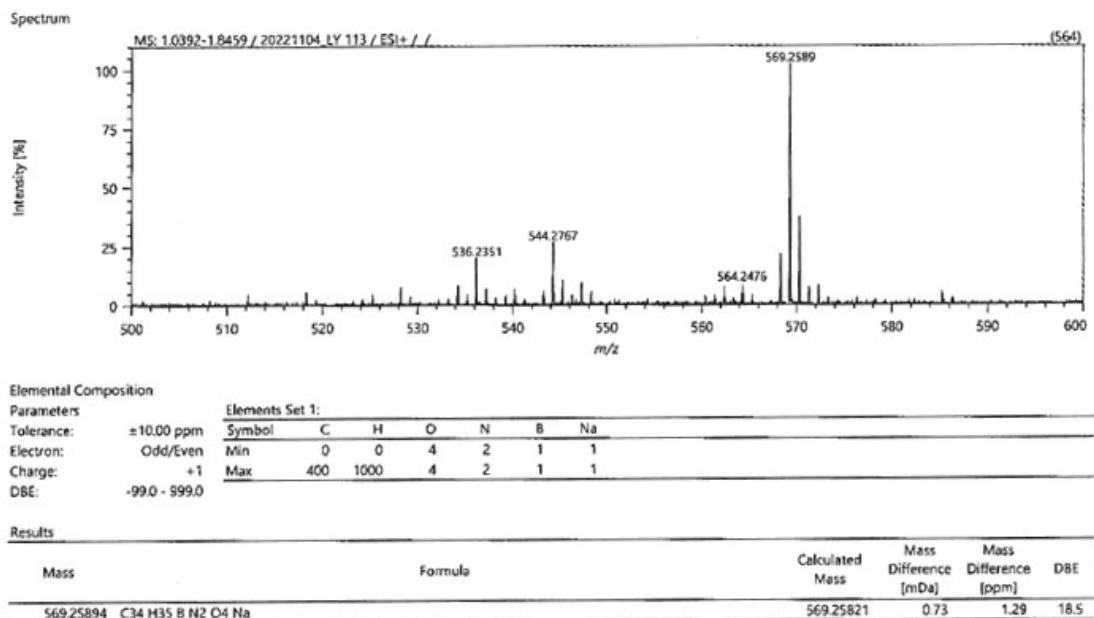

**Figure S52.** HRMS (ESI, positive ion)  $[\text{M} + \text{Na}]^+$  spectrum of compound **e2**

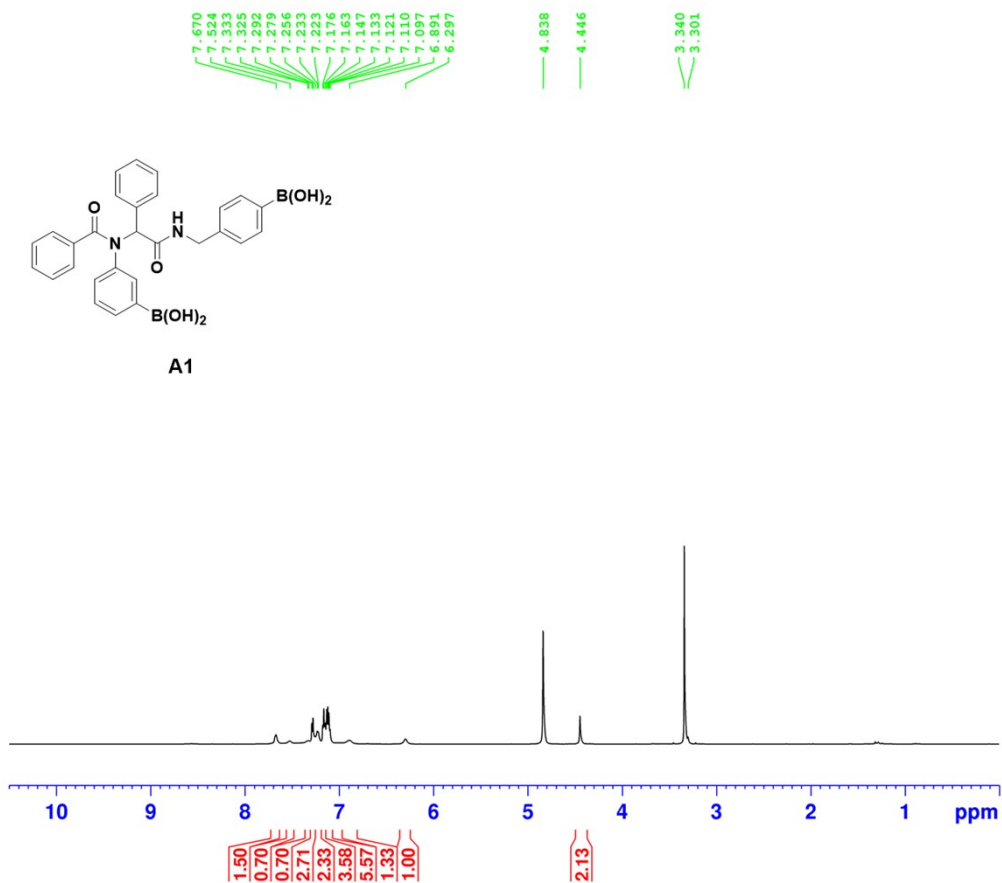

Figure S53. <sup>1</sup>H NMR (600 MHz, CDCl<sub>3</sub>) spectrum of compound A1

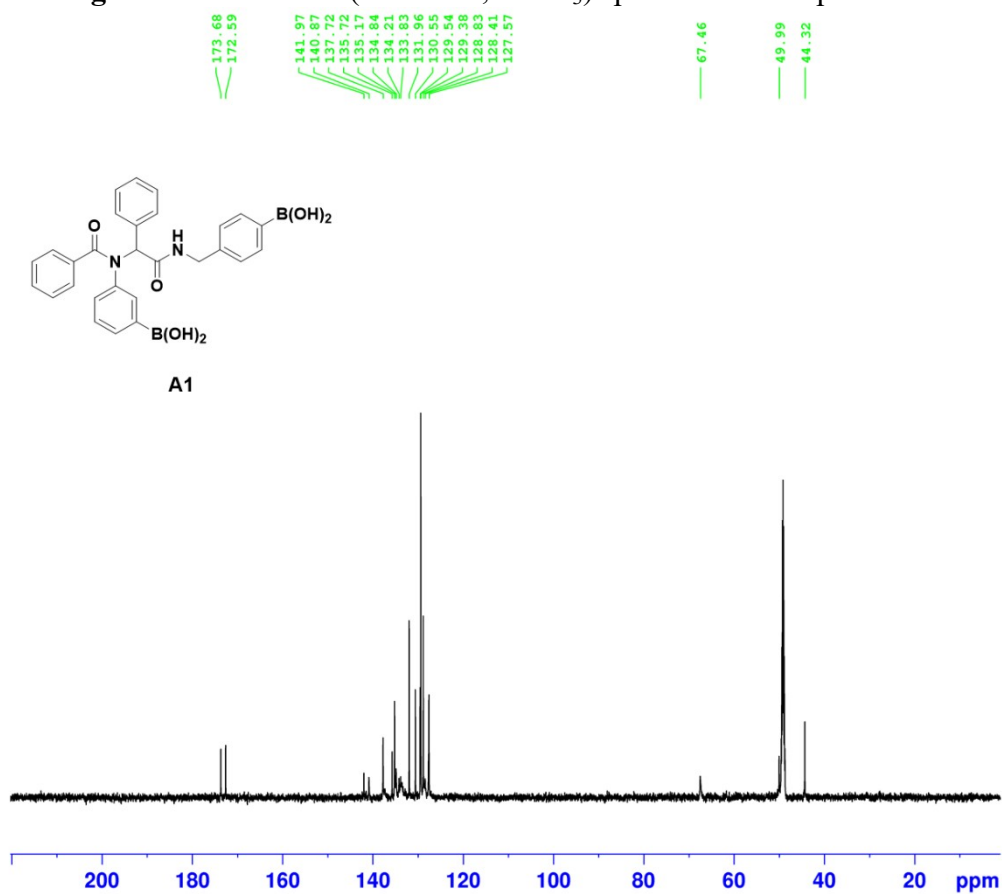

Figure S54. <sup>13</sup>C NMR (150 MHz, CDCl<sub>3</sub>) spectrum of compound A1

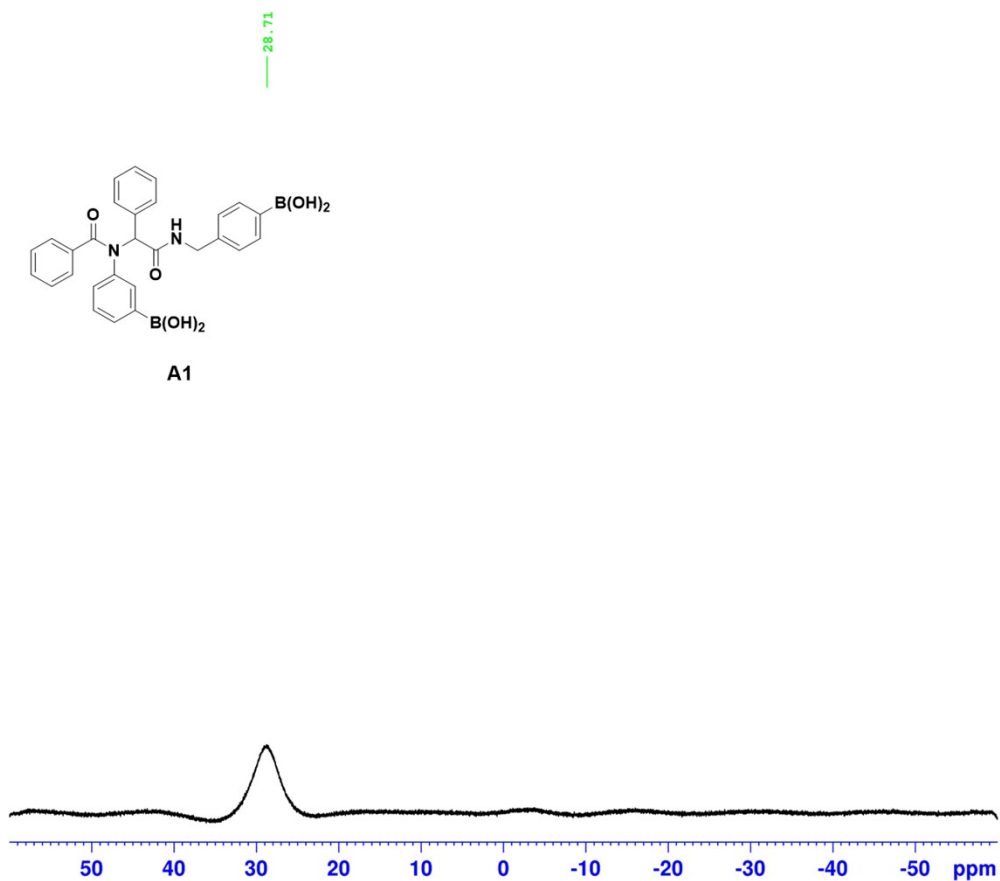

**Figure S55.**  $^{11}\text{B}$  NMR (192.5 MHz,  $\text{CDCl}_3$ ) spectrum of compound **A1**

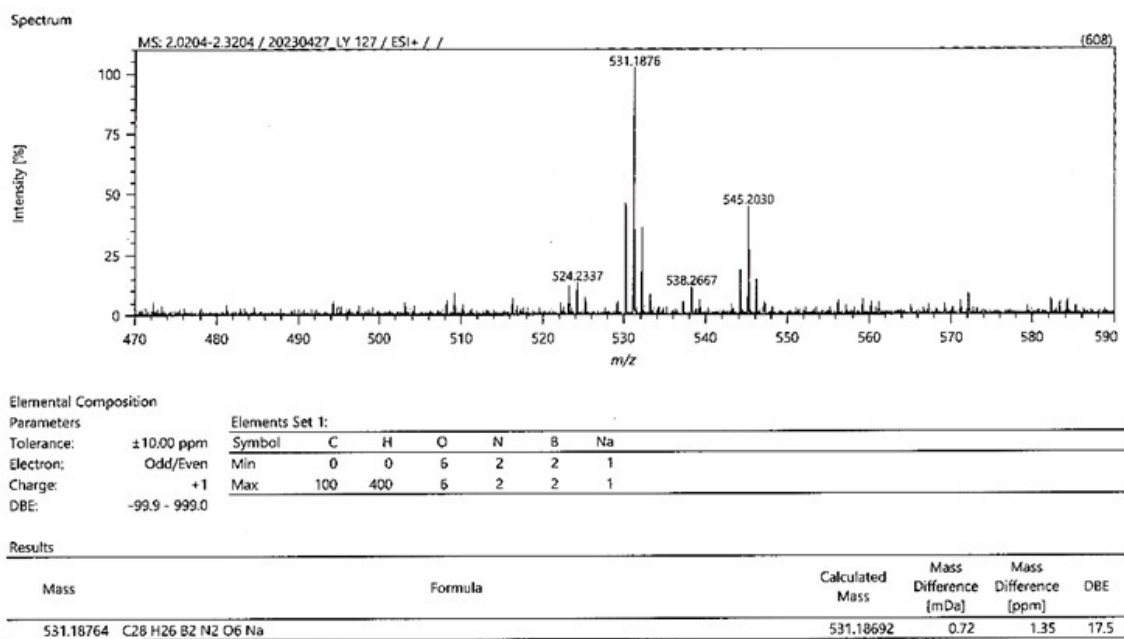

**Figure S56.** HRMS (ESI, positive ion)[ $\text{M} + \text{Na}$ ] $^+$  spectrum of compound **A1**

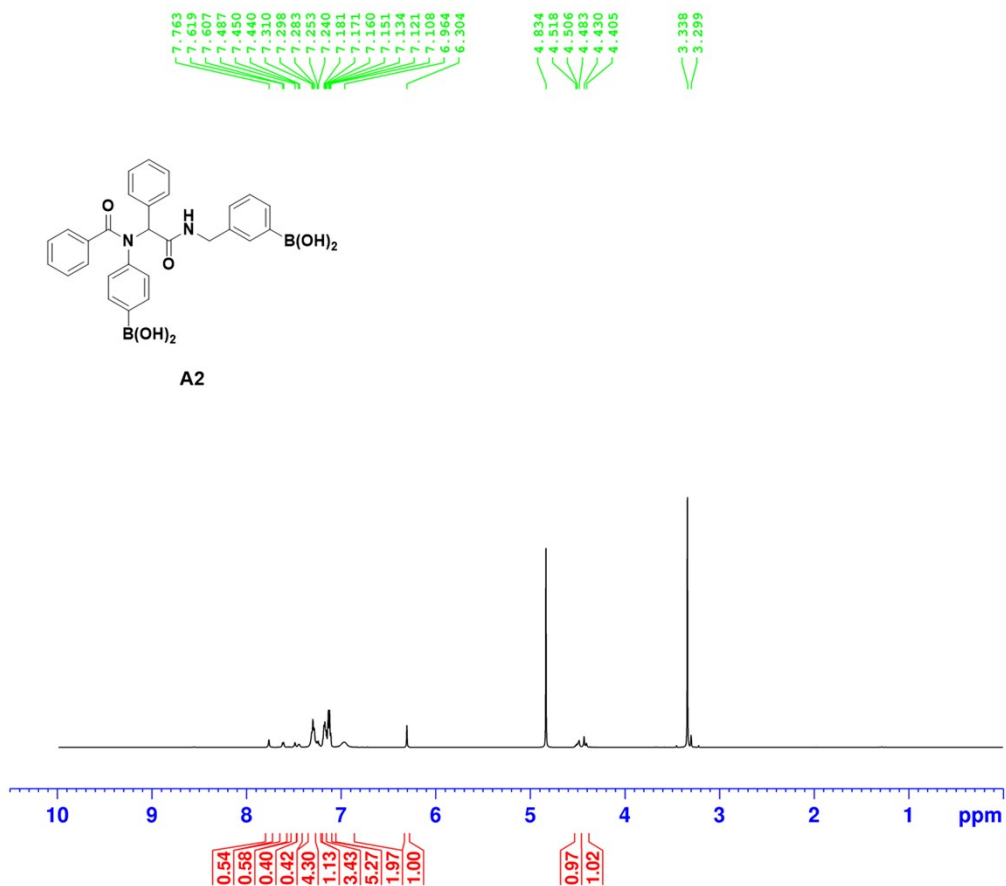

Figure S57. <sup>1</sup>H NMR (600 MHz, CDCl<sub>3</sub>) spectrum of compound A2

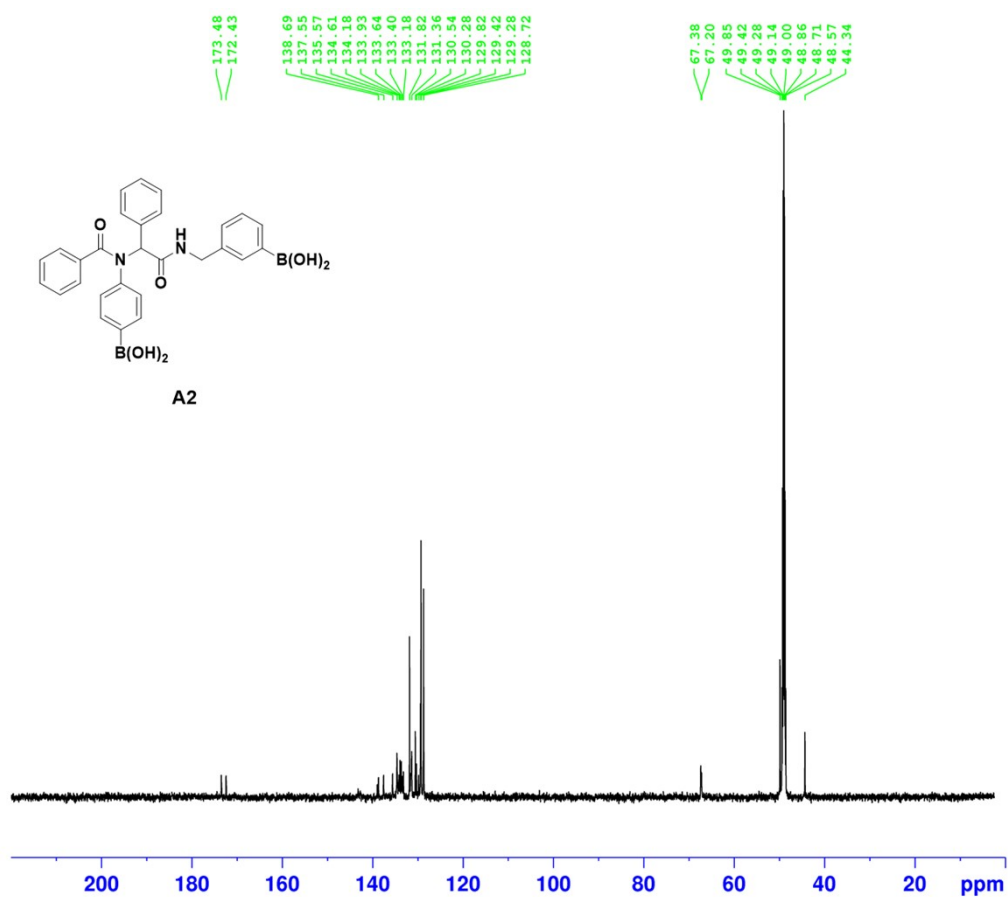

Figure S58. <sup>13</sup>C NMR (150 MHz, CDCl<sub>3</sub>) spectrum of compound A2

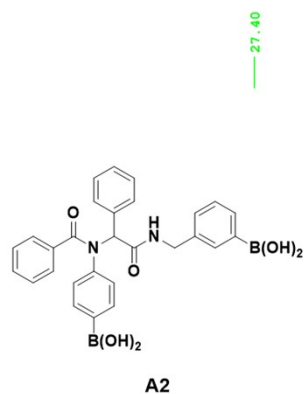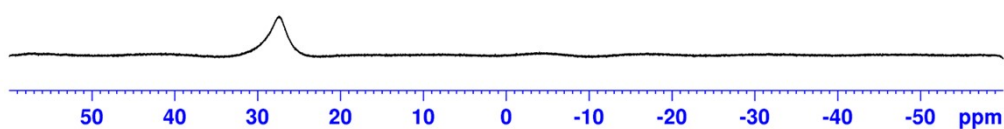

**Figure S59.**  $^{11}\text{B}$  NMR (192.5 MHz,  $\text{CDCl}_3$ ) spectrum of compound **A2**

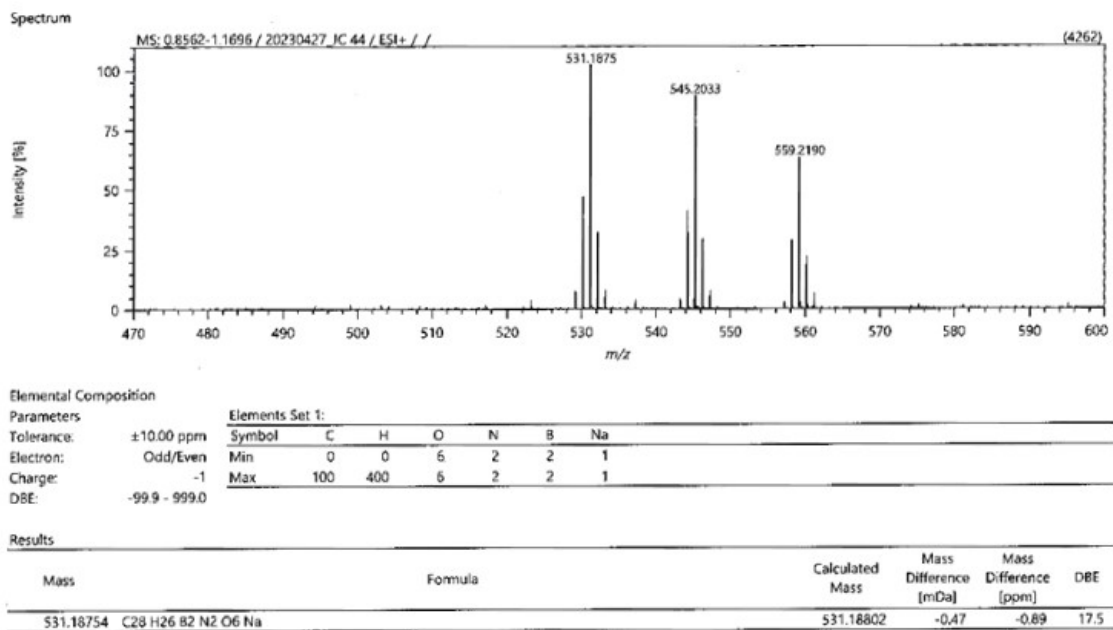

**Figure S60.** HRMS (ESI, positive ion)[ $\text{M} + \text{Na}$ ] $^+$  spectrum of compound **A2**

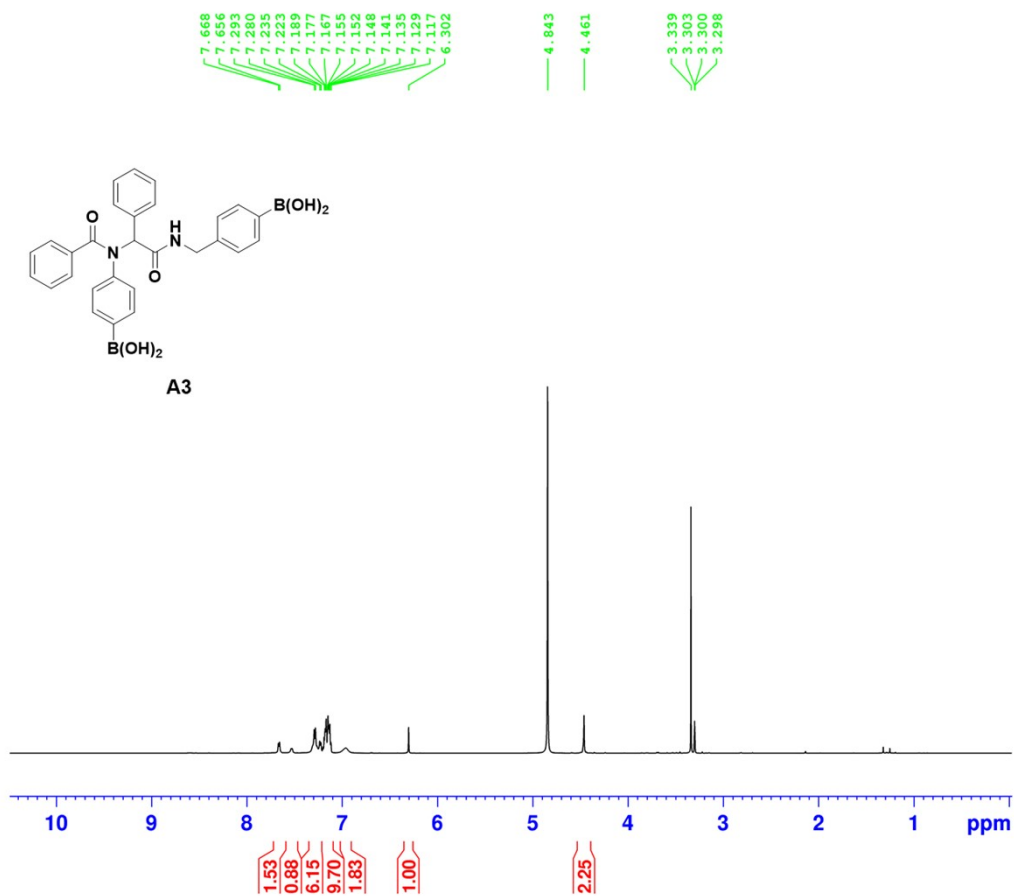

Figure S61. <sup>1</sup>H NMR (600 MHz, CDCl<sub>3</sub>) spectrum of compound A3

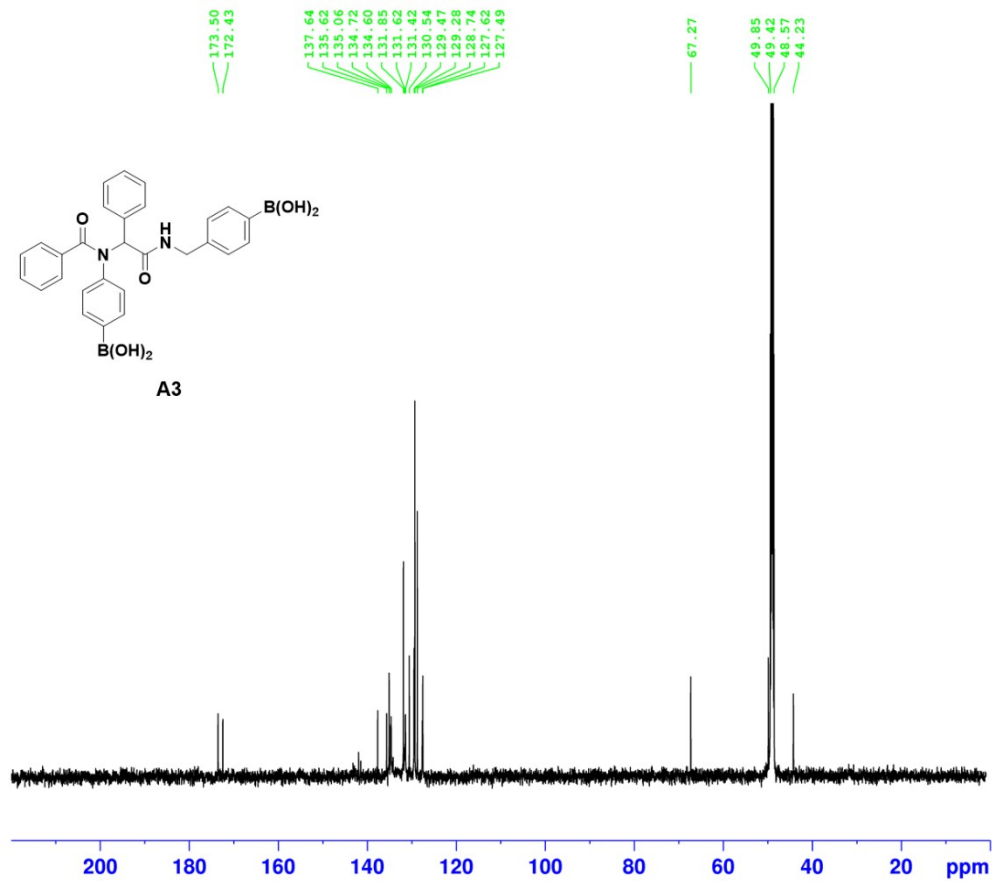

Figure S62. <sup>13</sup>C NMR (150 MHz, CDCl<sub>3</sub>) spectrum of compound A3

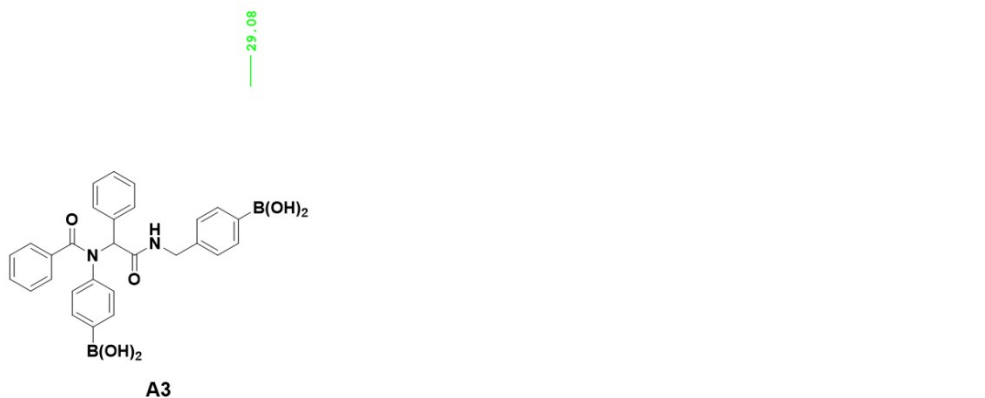

**Figure S63.**  $^{11}\text{B}$  NMR (192.5 MHz,  $\text{CDCl}_3$ ) spectrum of compound **A3**

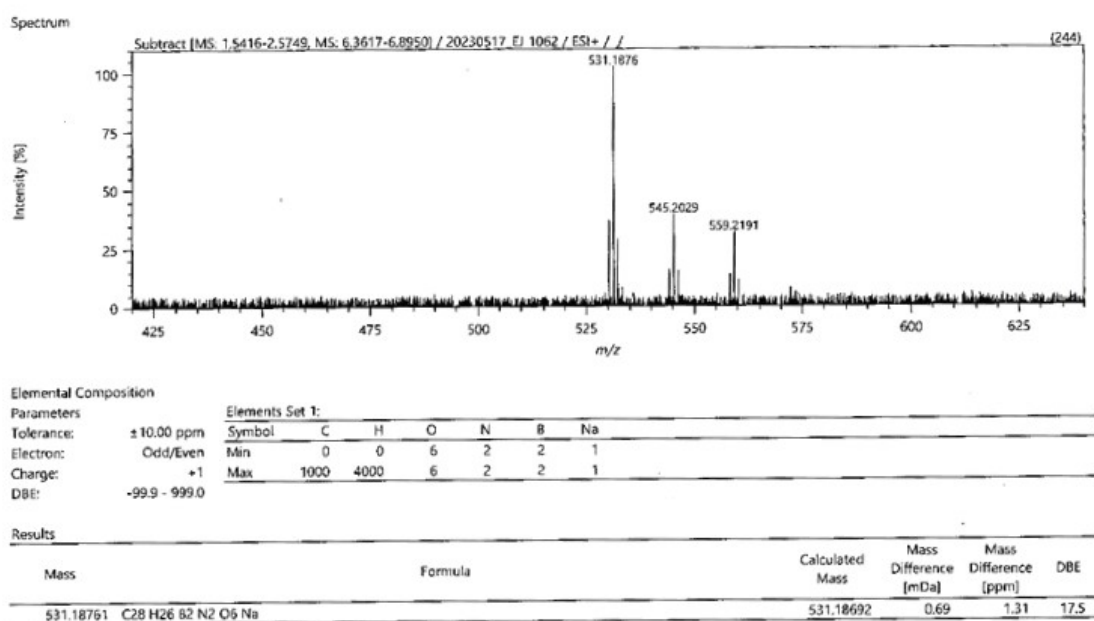

**Figure S64.** HRMS (ESI, positive ion)[ $\text{M} + \text{Na}$ ] $^+$  spectrum of compound **A3**



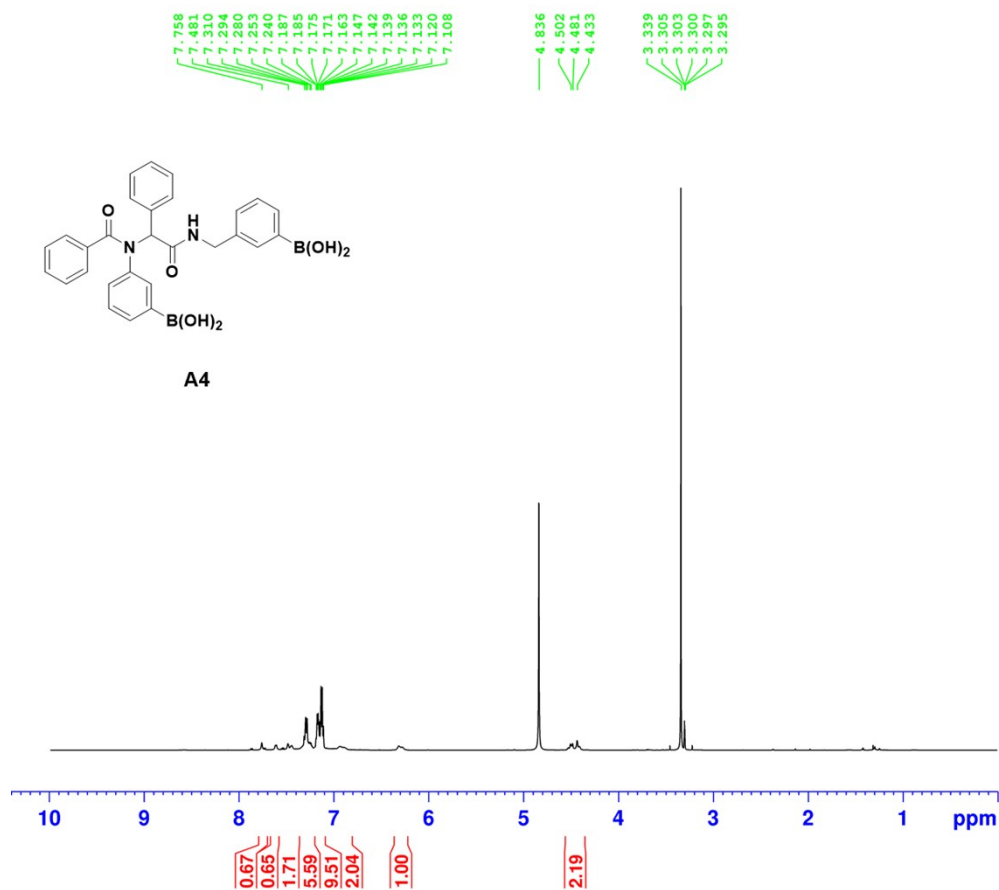

Figure S65. <sup>1</sup>H NMR (600 MHz, CDCl<sub>3</sub>) spectrum of compound A4

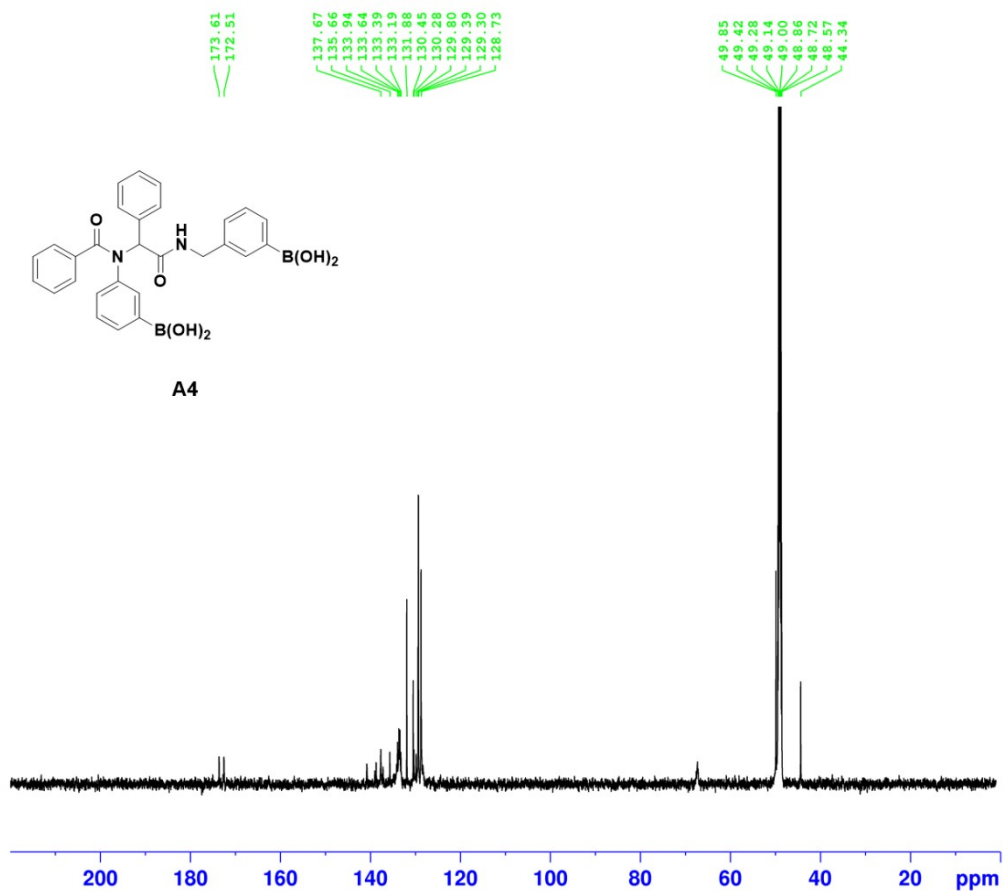

Figure S66. <sup>13</sup>C NMR (150 MHz, CDCl<sub>3</sub>) spectrum of compound A4

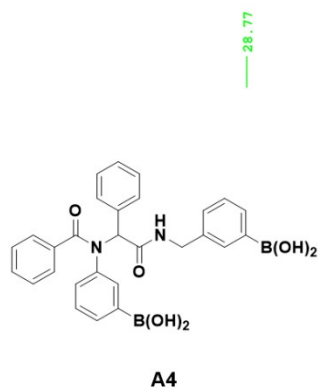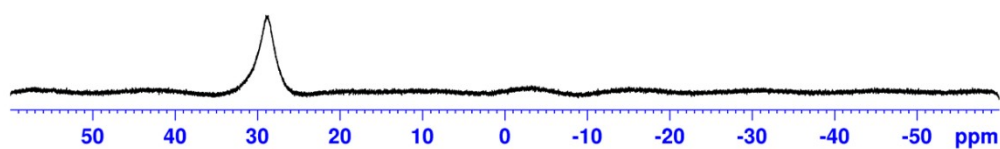

**Figure S67.** <sup>11</sup>B NMR (192.5 MHz, CDCl<sub>3</sub>) spectrum of compound A4

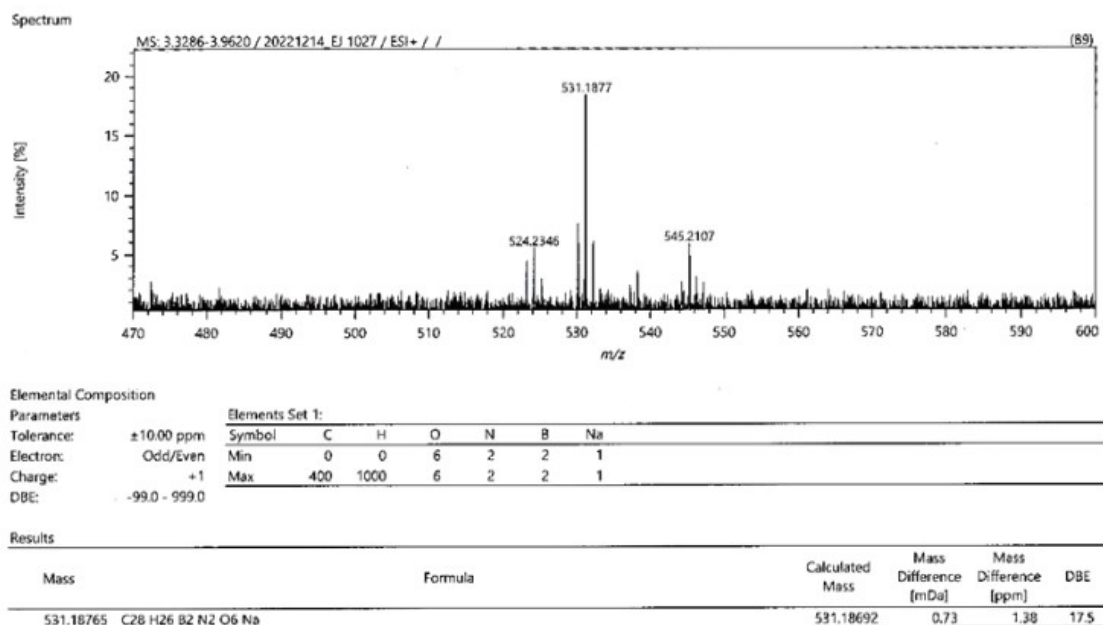

**Figure S68.** HRMS (ESI, positive ion)[M + Na]<sup>+</sup> spectrum of compound A4

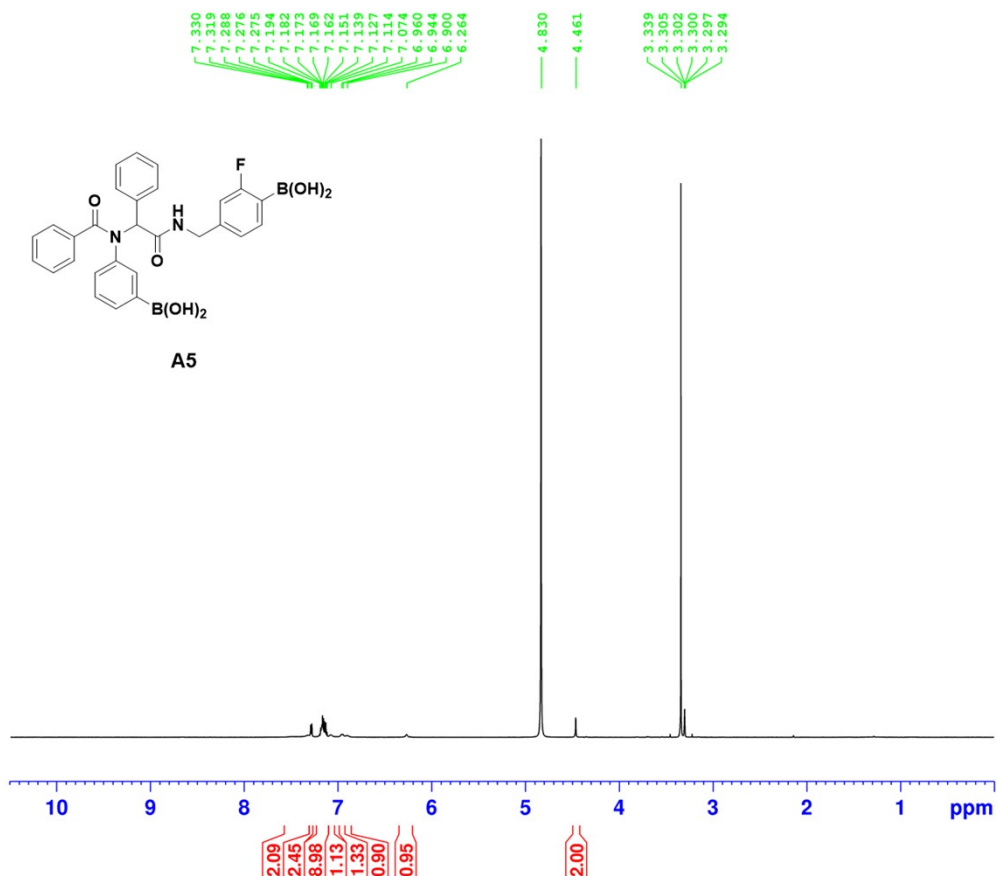

Figure S69. <sup>1</sup>H NMR (600 MHz, CDCl<sub>3</sub>) spectrum of compound A5

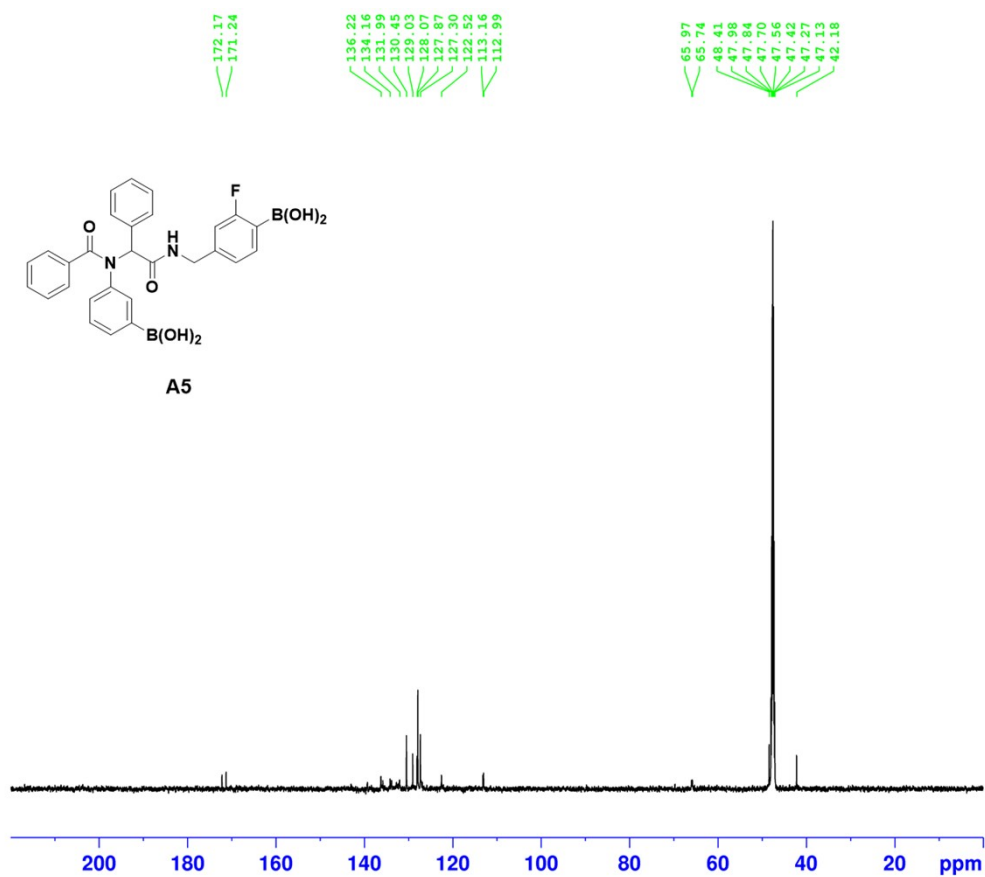

Figure S70. <sup>13</sup>C NMR (150 MHz, CDCl<sub>3</sub>) spectrum of compound A5

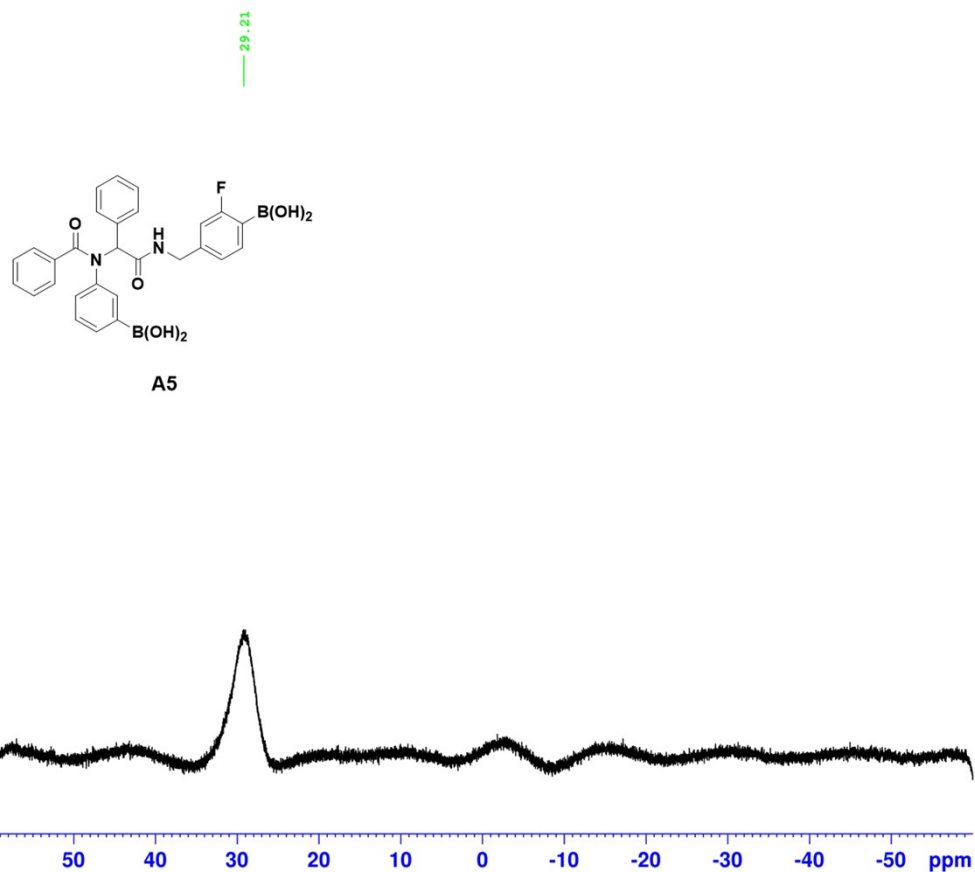

**Figure S71.**  $^{11}\text{B}$  NMR (192.5 MHz,  $\text{CDCl}_3$ ) spectrum of compound **A5**

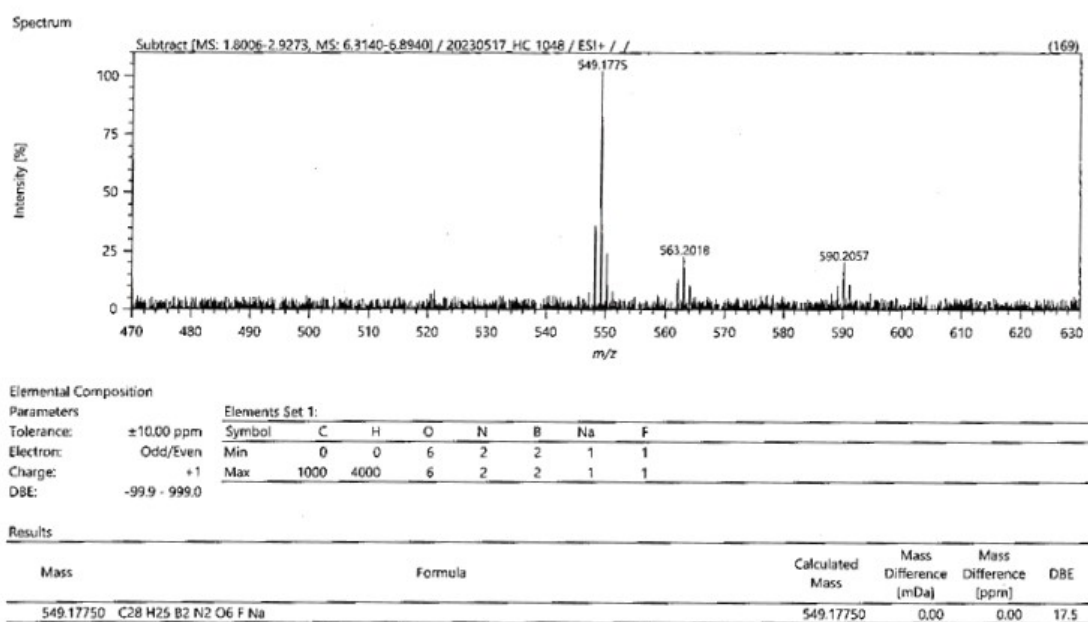

**Figure S72.** HRMS (ESI, positive ion)[ $\text{M} + \text{Na}$ ] $^+$  spectrum of compound **A5**

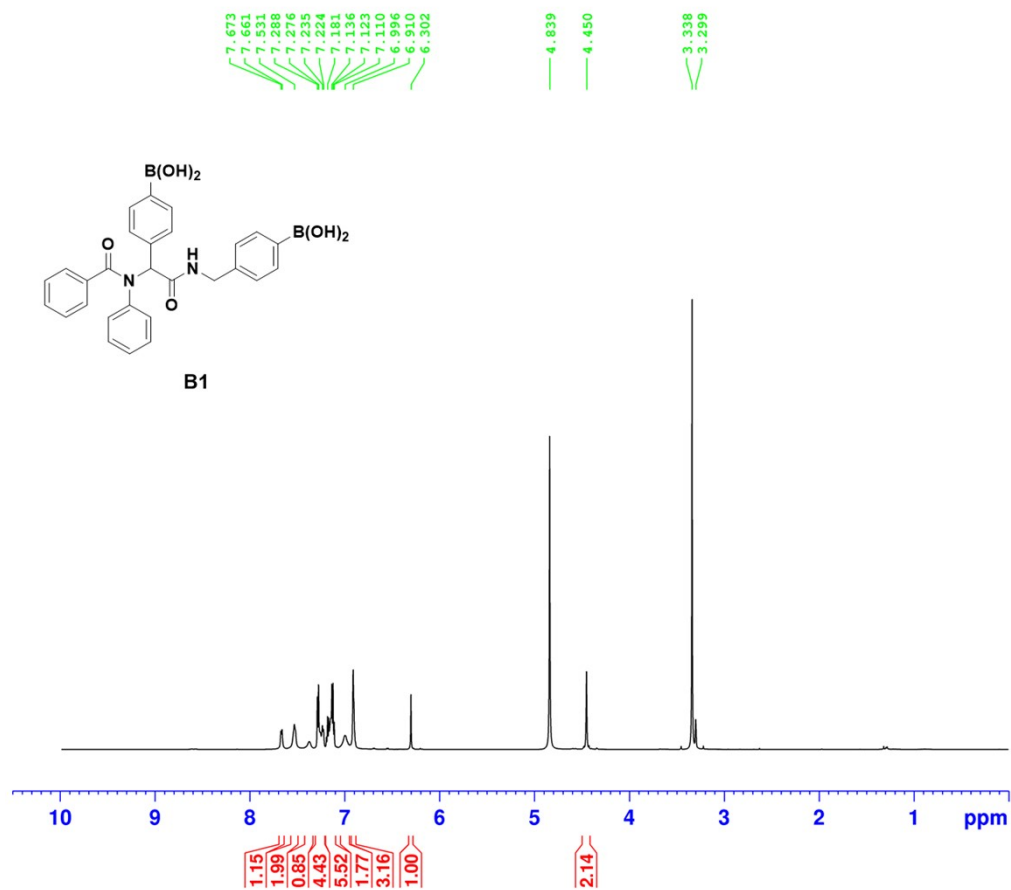

Figure S73.  $^1\text{H}$  NMR (600 MHz,  $\text{CDCl}_3$ ) spectrum of compound **B1**

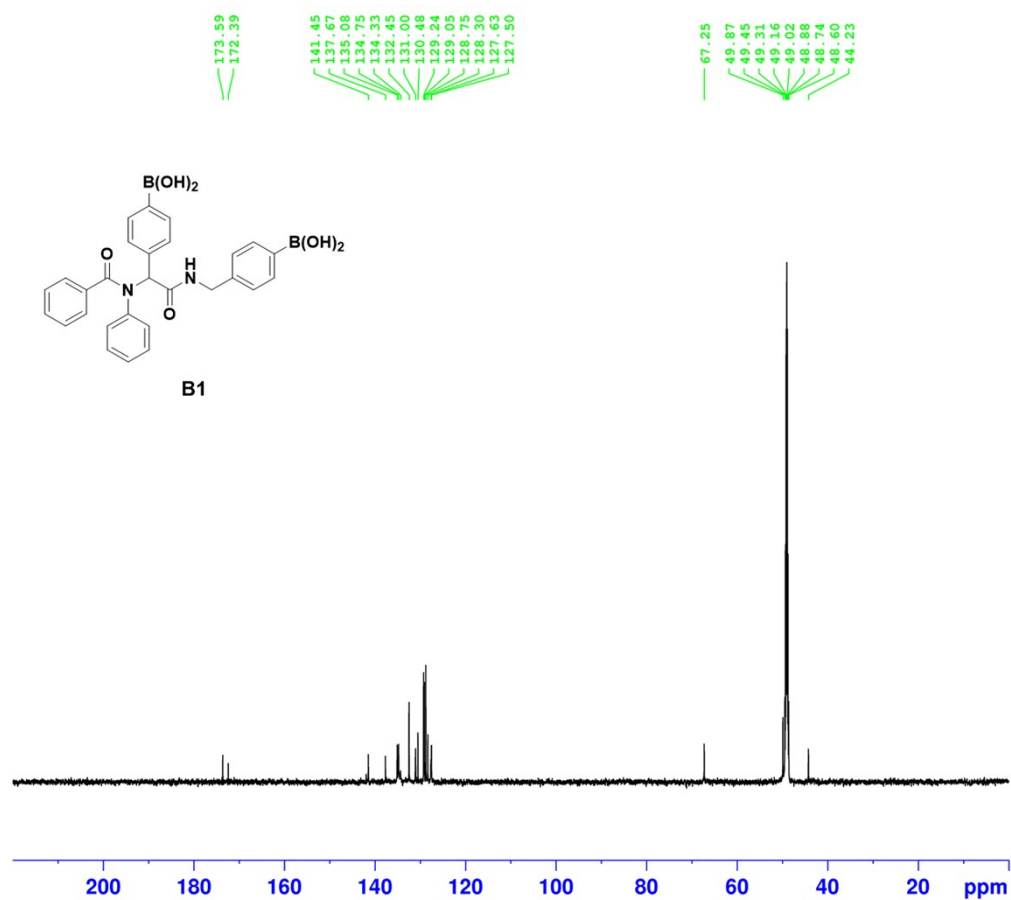

Figure S74.  $^{13}\text{C}$  NMR (150 MHz,  $\text{CDCl}_3$ ) spectrum of compound **B1**

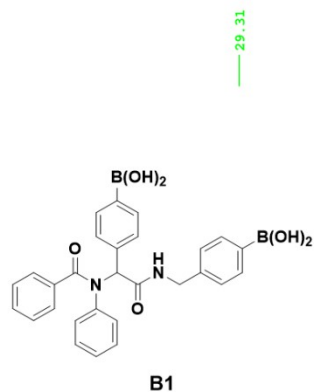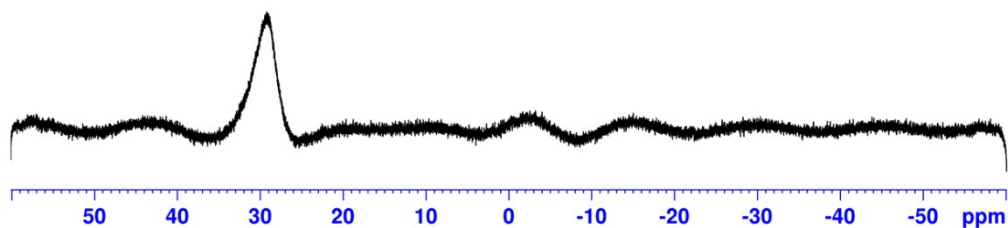

**Figure S75.**  $^{11}\text{B}$  NMR (192.5 MHz,  $\text{CDCl}_3$ ) spectrum of compound B1

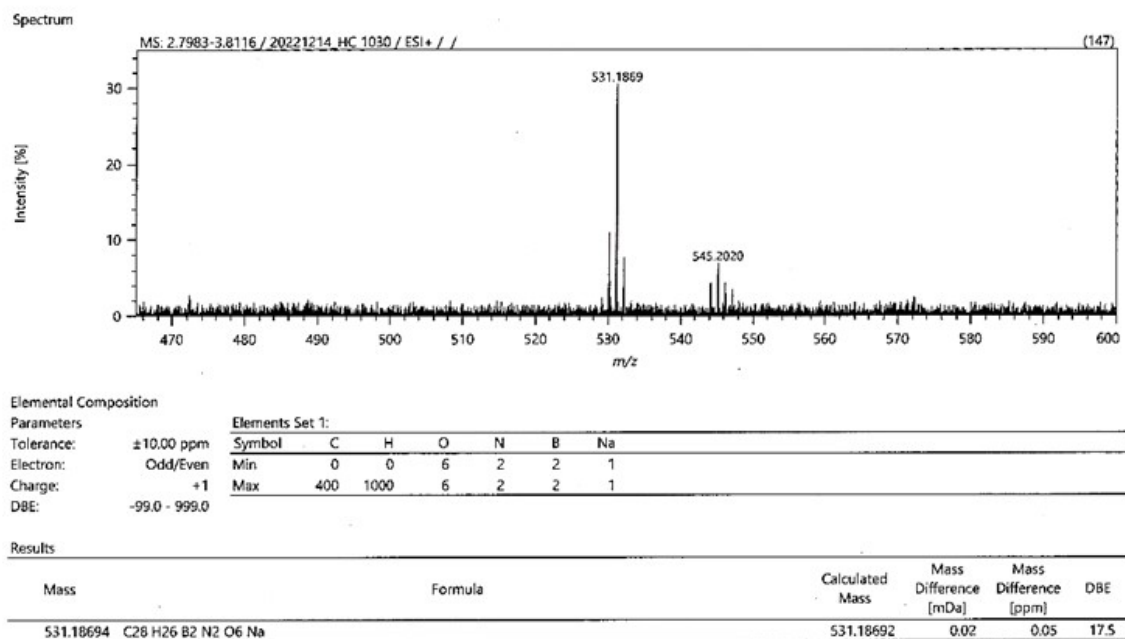

**Figure S76.** HRMS (ESI, positive ion)[ $\text{M} + \text{Na}$ ] $^+$  spectrum of compound B1

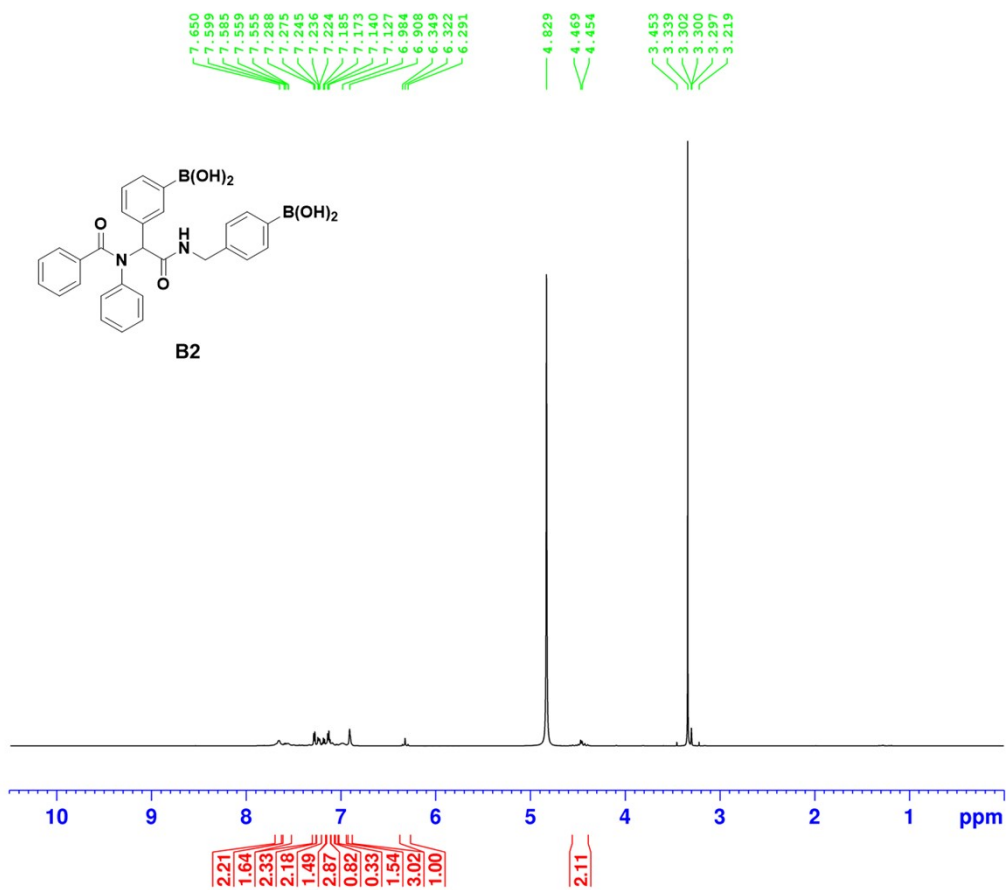

**Figure S77. <sup>1</sup>H NMR (600 MHz, CDCl<sub>3</sub>) spectrum of compound B2**

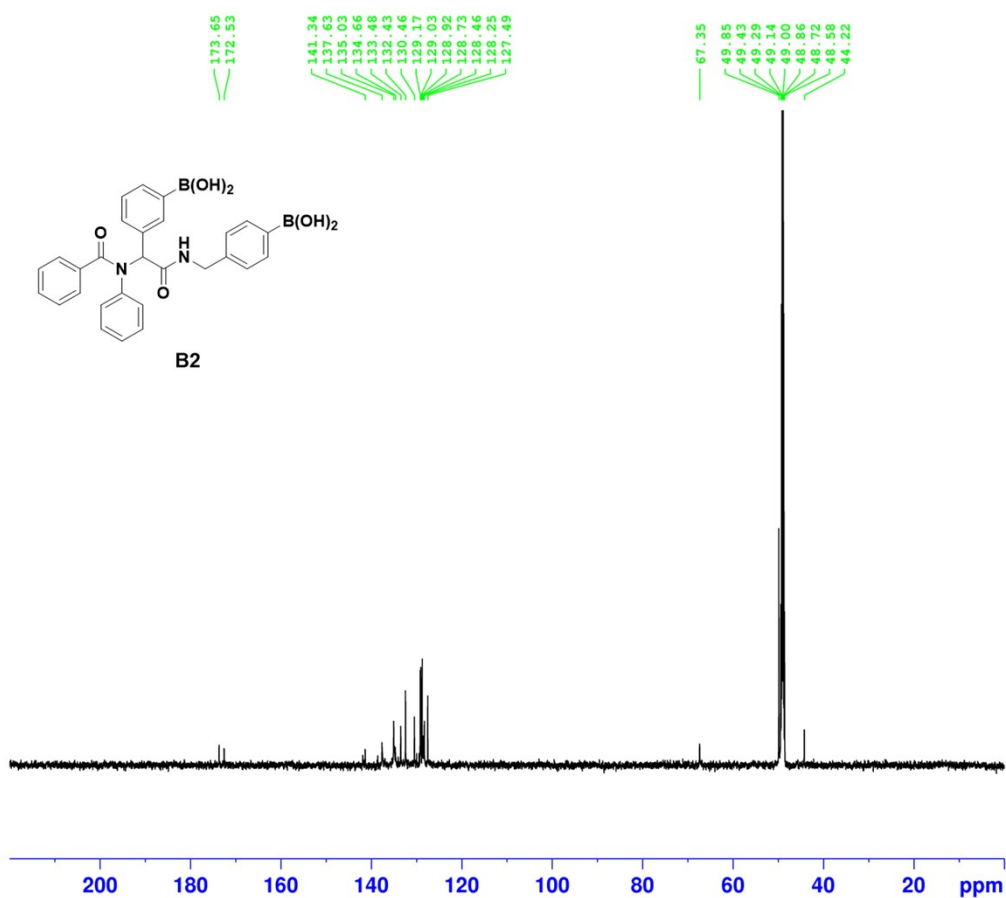

**Figure S78. <sup>13</sup>C NMR (150 MHz, CDCl<sub>3</sub>) spectrum of compound B2**

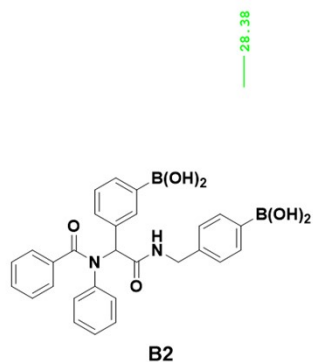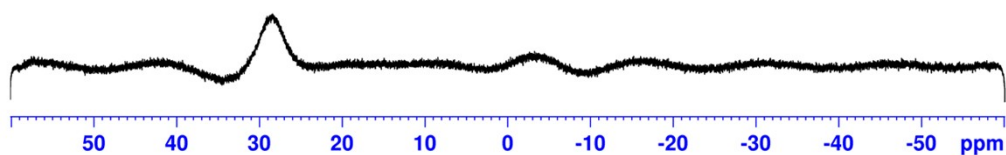

**Figure S79.**  $^{11}\text{B}$  NMR (192.5 MHz,  $\text{CDCl}_3$ ) spectrum of compound **B2**

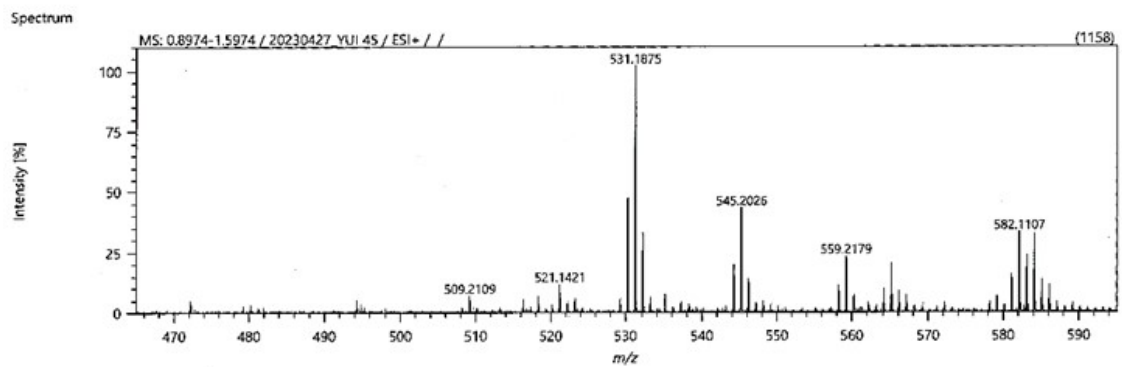

Elemental Composition

Parameters

Tolerance:  $\pm 10.00$  ppm  
 Electron: Odd/Even  
 Charge: -1  
 DBE: -99.9 - 999.0

Elements Set 1:

| Symbol | C   | H   | O | N | B | Na |
|--------|-----|-----|---|---|---|----|
| Min    | 0   | 0   | 6 | 2 | 2 | 1  |
| Max    | 100 | 400 | 6 | 2 | 2 | 1  |

Results

| Mass      | Formula                                                             | Calculated Mass | Mass Difference [mDa] | Mass Difference [ppm] | DBE  |
|-----------|---------------------------------------------------------------------|-----------------|-----------------------|-----------------------|------|
| 531.18746 | $\text{C}_{28}\text{H}_{26}\text{B}_2\text{N}_2\text{O}_6\text{Na}$ | 531.18802       | -0.56                 | -1.05                 | 17.5 |

**Figure S80.** HRMS (ESI, positive ion)[ $\text{M} + \text{Na}$ ] $^+$  spectrum of compound **B2**



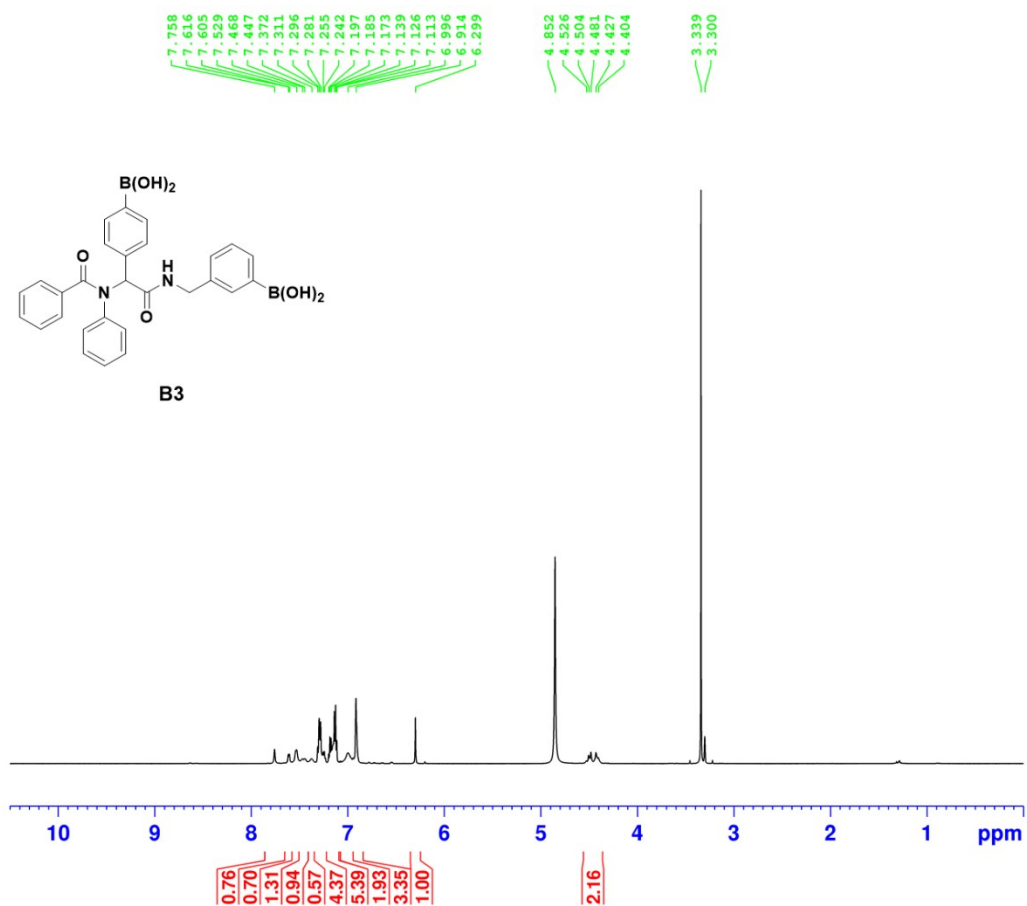

**Figure S81.** <sup>1</sup>H NMR (600 MHz, CDCl<sub>3</sub>) spectrum of compound **B3**

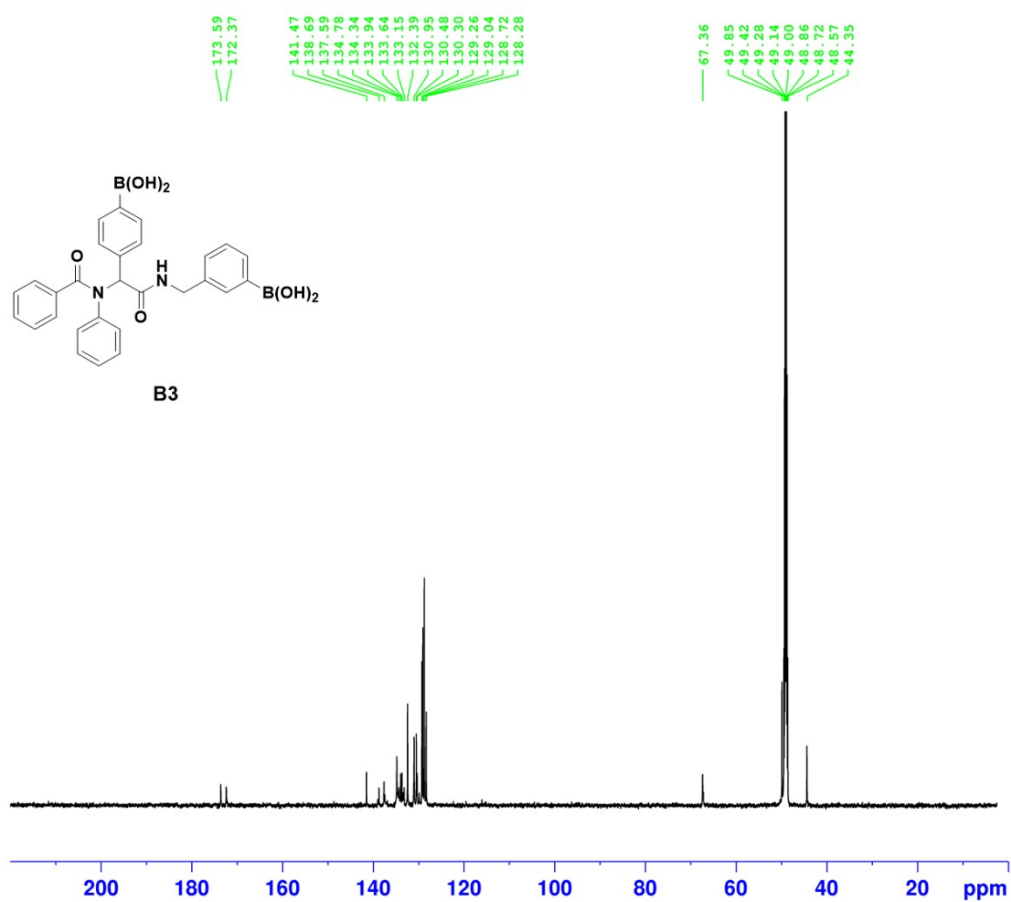

**Figure S82.** <sup>13</sup>C NMR (150 MHz, CDCl<sub>3</sub>) spectrum of compound **B3**

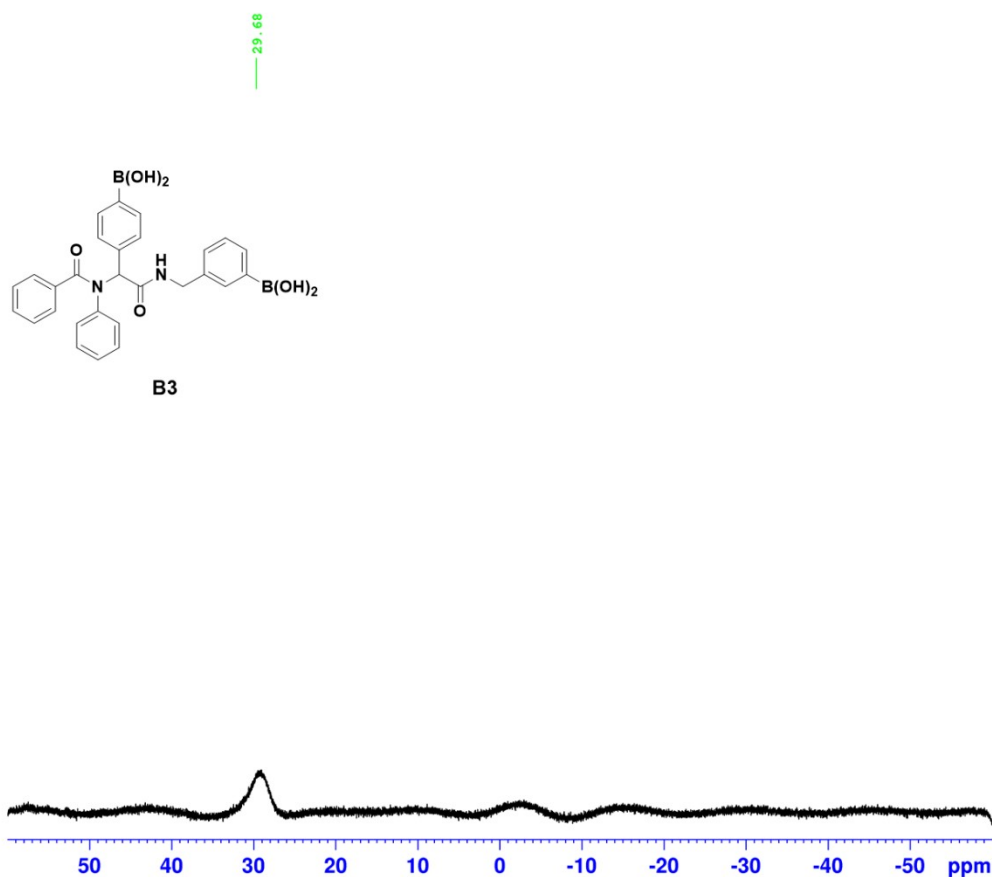

**Figure S83.**  $^{11}\text{B}$  NMR (192.5 MHz,  $\text{CDCl}_3$ ) spectrum of compound **B3**

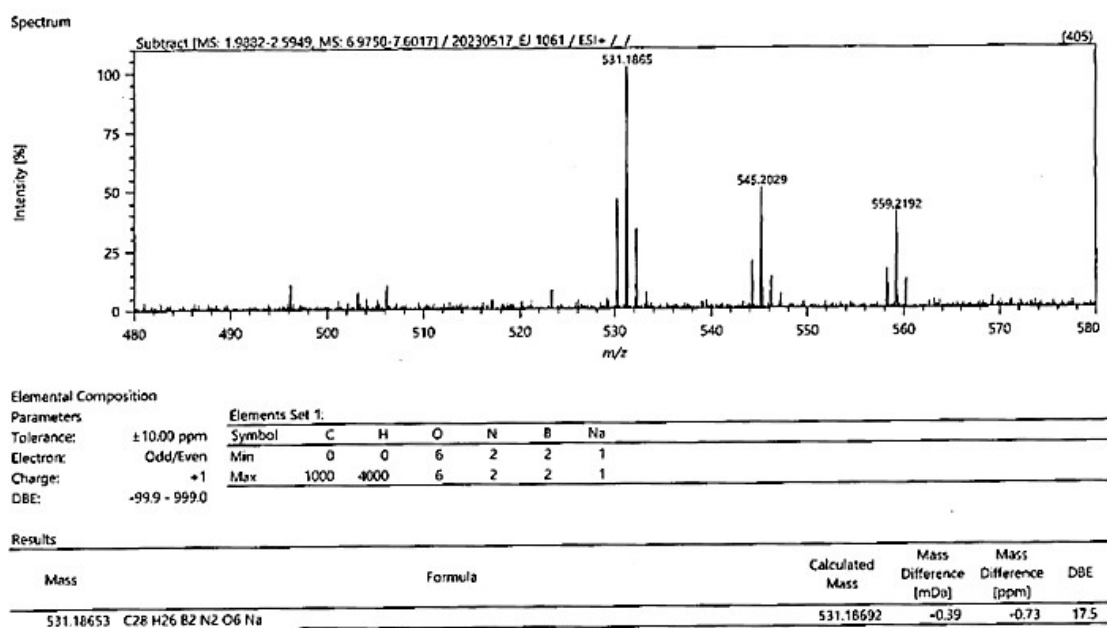

**Figure S84.** HRMS (ESI, positive ion)[ $\text{M} + \text{Na}$ ] $^+$  spectrum of compound **B3**

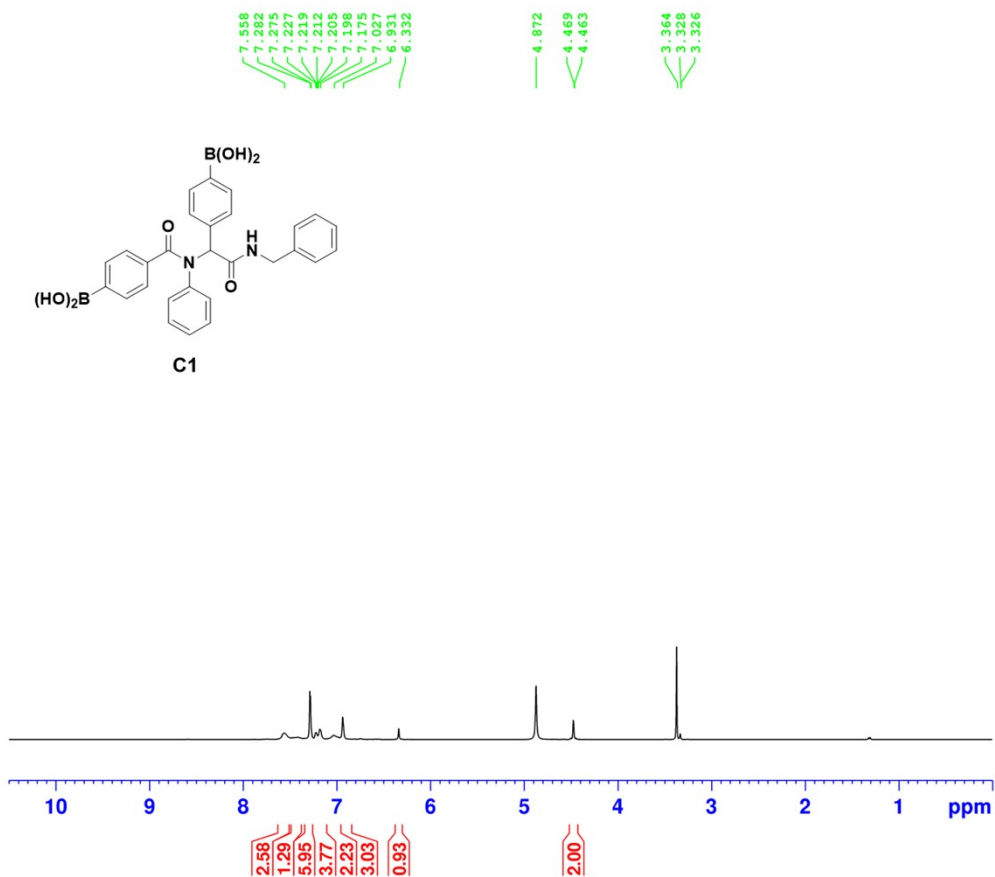

Figure S85. <sup>1</sup>H NMR (600 MHz, CDCl<sub>3</sub>) spectrum of compound C1

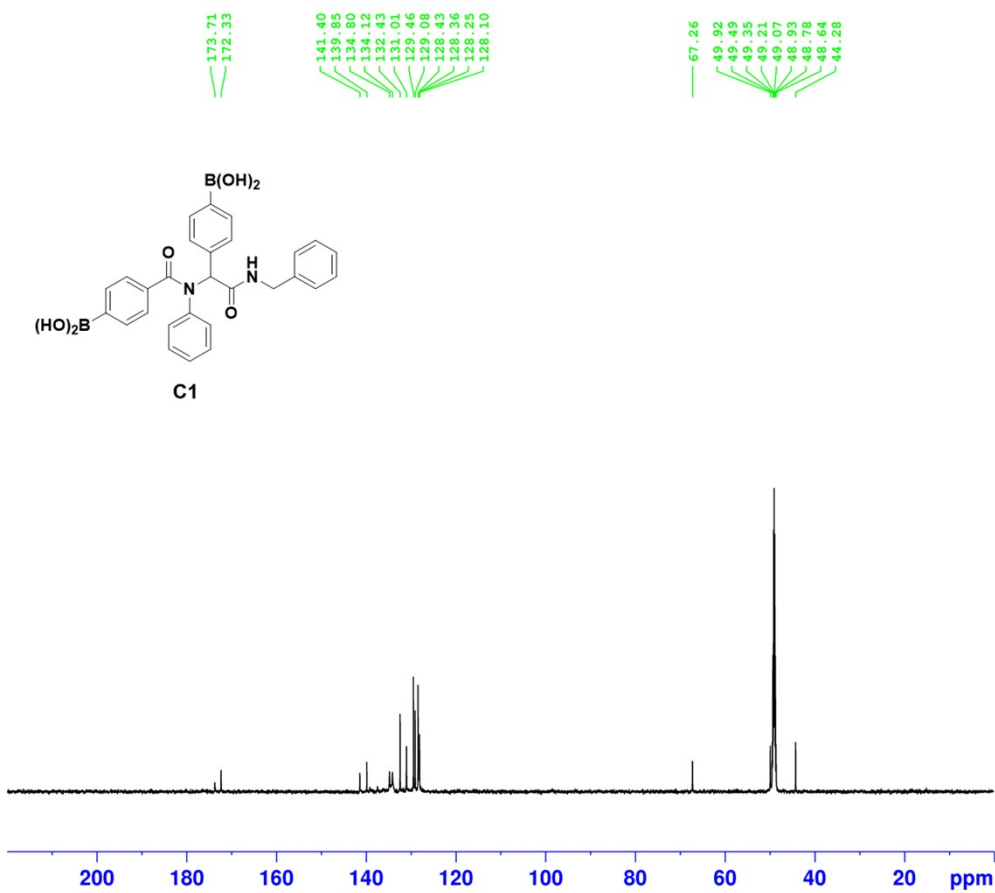

Figure S86. <sup>13</sup>C NMR (150 MHz, CDCl<sub>3</sub>) spectrum of compound C1

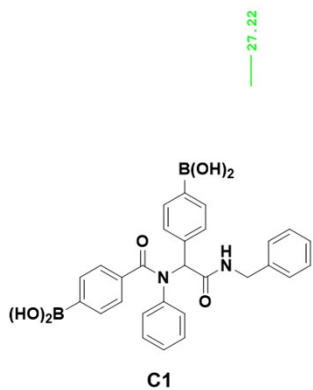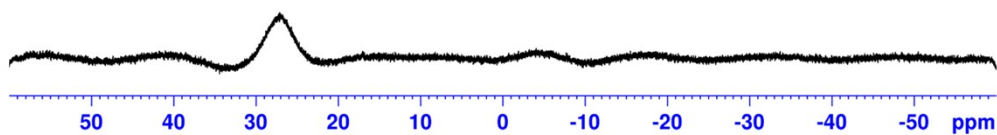

**Figure S87.**  $^{11}\text{B}$  NMR (192.5 MHz,  $\text{CDCl}_3$ ) spectrum of compound C1

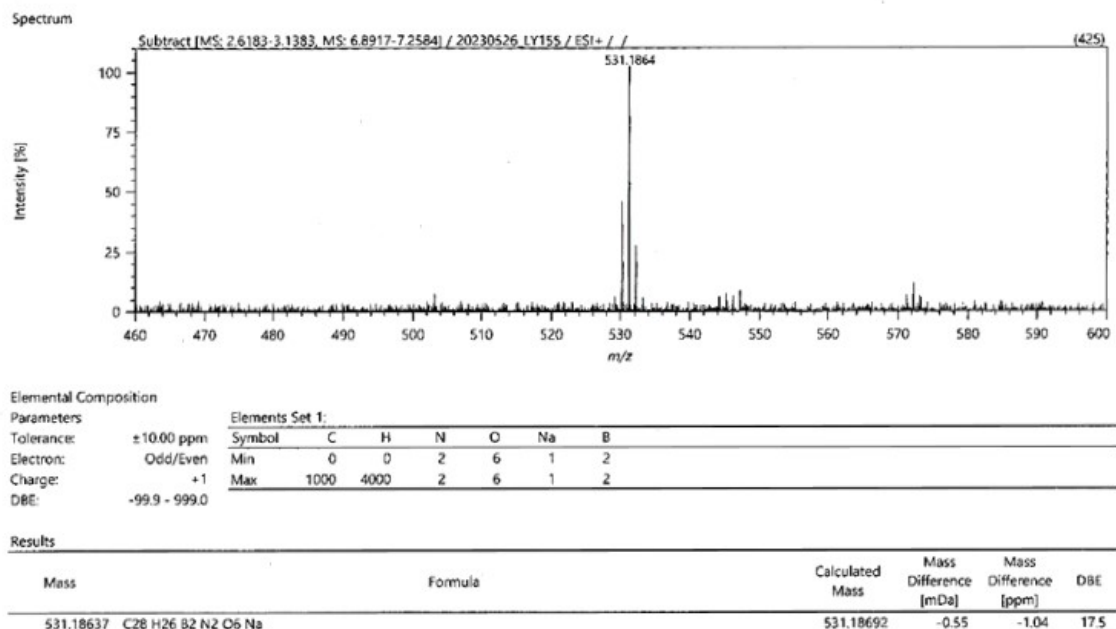

**Figure S88.** HRMS (ESI, positive ion)[ $\text{M} + \text{Na}$ ] $^+$  spectrum of compound C1

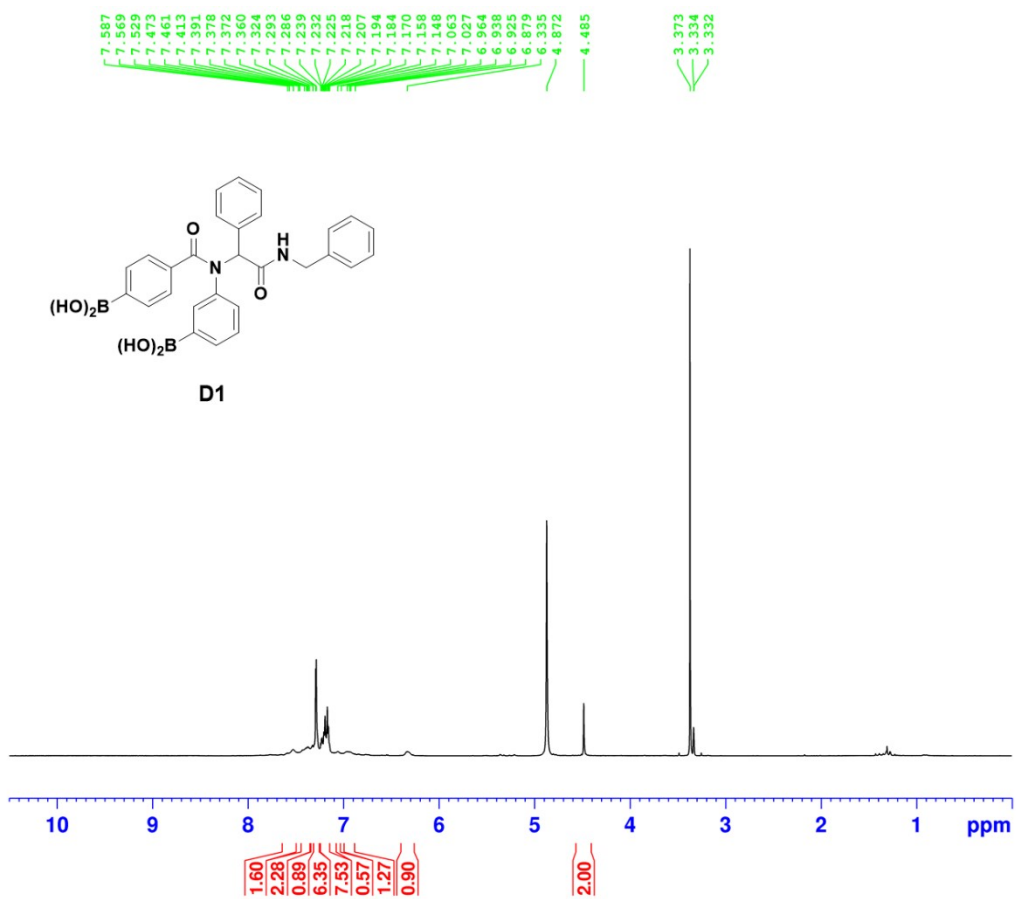

Figure S89. <sup>1</sup>H NMR (600 MHz, CDCl<sub>3</sub>) spectrum of compound D1

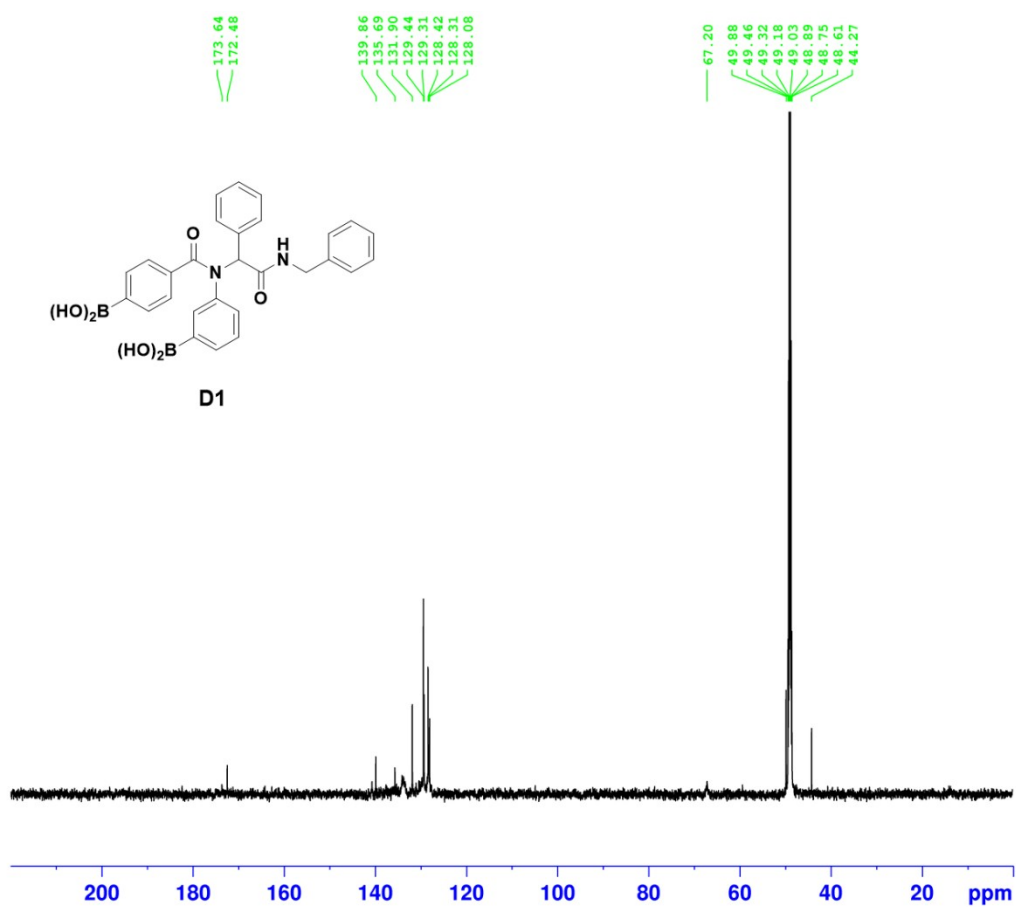

Figure S90. <sup>13</sup>C NMR (150 MHz, CDCl<sub>3</sub>) spectrum of compound D1

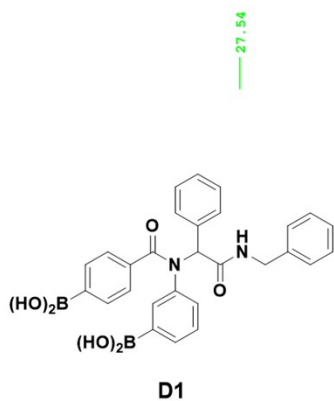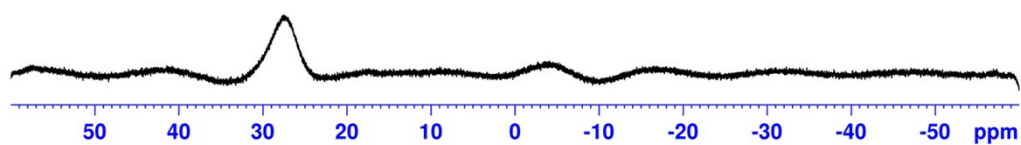

**Figure S91.**  $^{11}\text{B}$  NMR (192.5 MHz,  $\text{CDCl}_3$ ) spectrum of compound D1

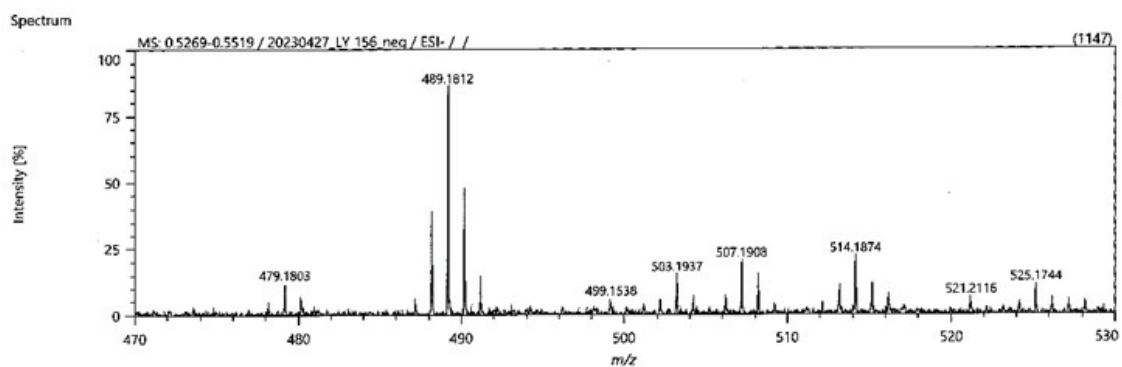

Elemental Composition  
 Parameters  
 Tolerance:  $\pm 10.00$  ppm  
 Electron: Odd/Even  
 Charge: -1  
 DBE: -99.9 - 999.0

| Elements Set 1: |     |     |   |   |   |
|-----------------|-----|-----|---|---|---|
| Symbol          | C   | H   | O | N | B |
| Min             | 0   | 0   | 6 | 2 | 2 |
| Max             | 100 | 400 | 6 | 2 | 2 |

Results

| Mass      | Formula                                                    | Calculated Mass | Mass Difference [mDa] | Mass Difference [ppm] | DBE  |
|-----------|------------------------------------------------------------|-----------------|-----------------------|-----------------------|------|
| 507.19079 | $\text{C}_{28}\text{H}_{25}\text{B}_2\text{N}_2\text{O}_6$ | 507.19042       | 0.37                  | 0.74                  | 18.5 |

**Figure S92.** HRMS (ESI, negative ion) $[\text{M} + \text{H}]^-$  spectrum of compound D1

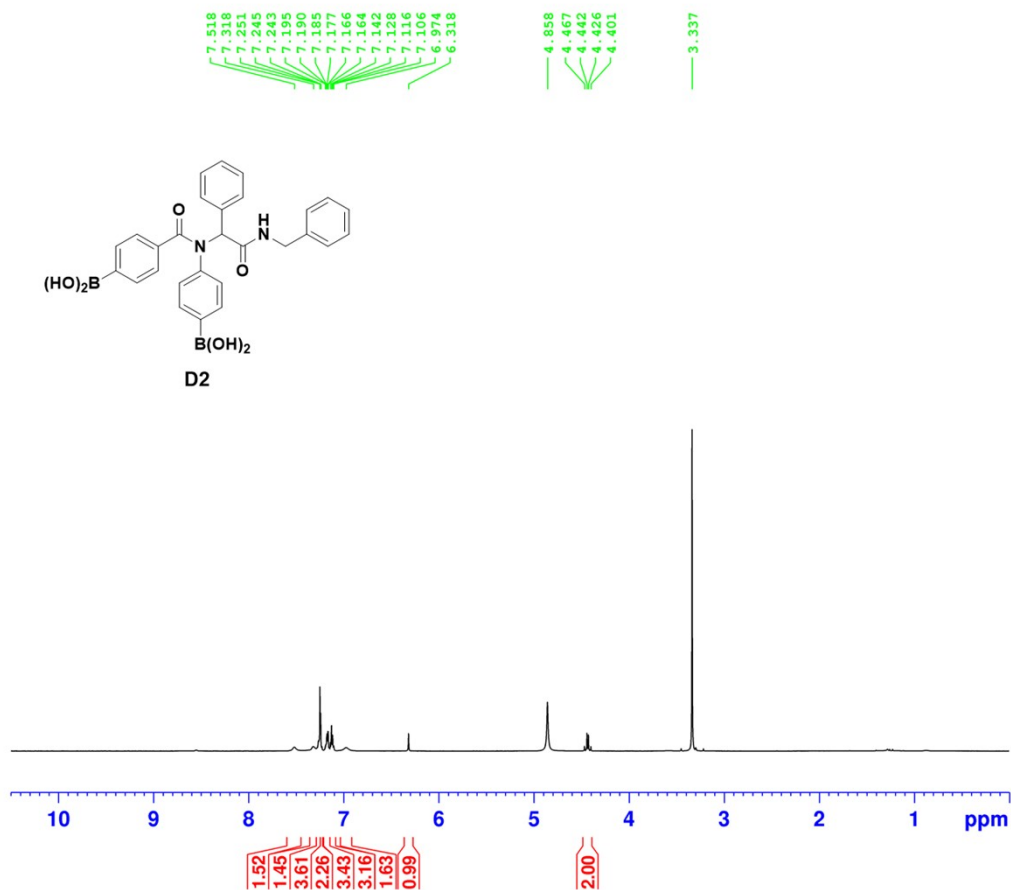

**Figure S93.**  $^1H$  NMR (600 MHz,  $CDCl_3$ ) spectrum of compound **D2**

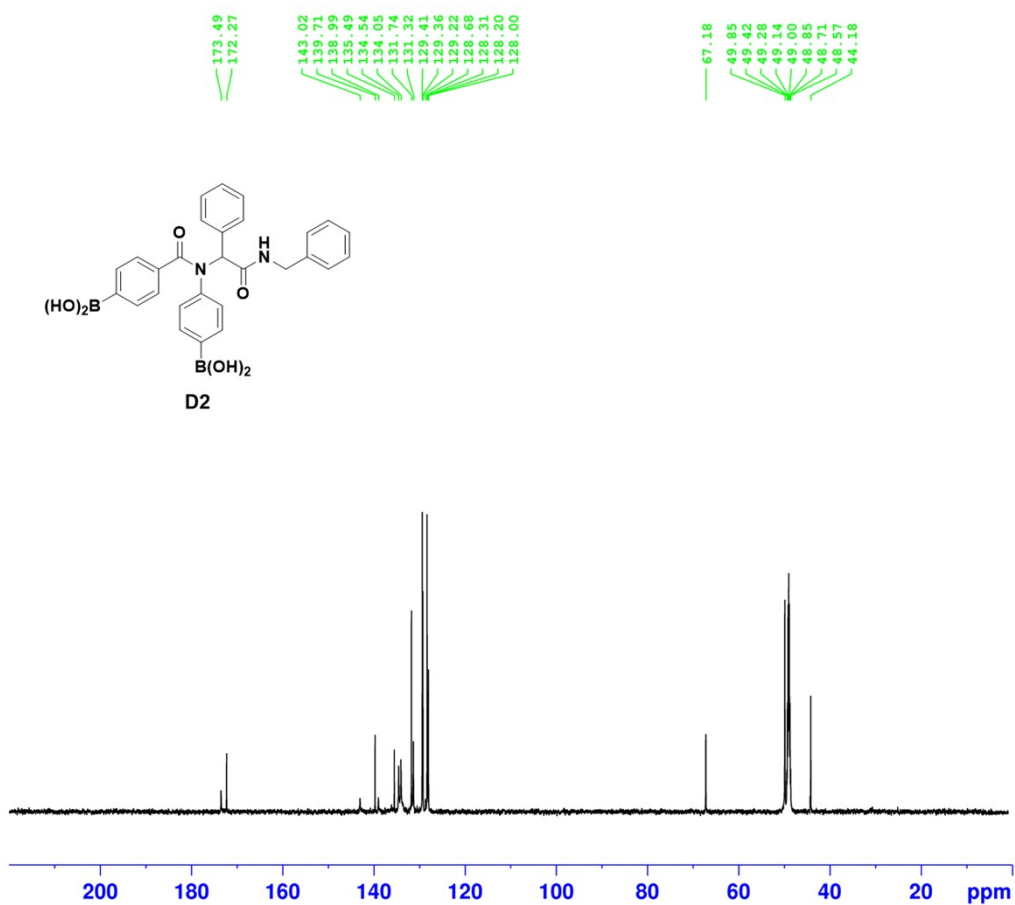

**Figure S94.**  $^{13}C$  NMR (150 MHz,  $CDCl_3$ ) spectrum of compound **D2**

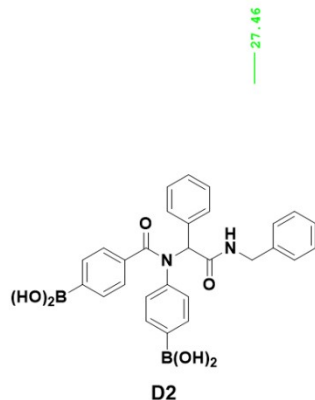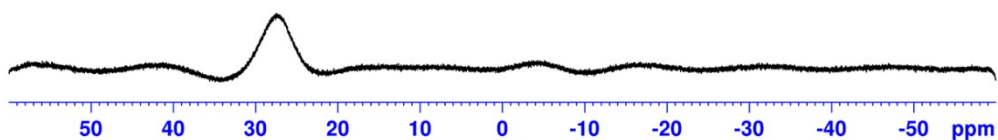

**Figure S95.**  $^{11}\text{B}$  NMR (192.5 MHz,  $\text{CDCl}_3$ ) spectrum of compound **D2**

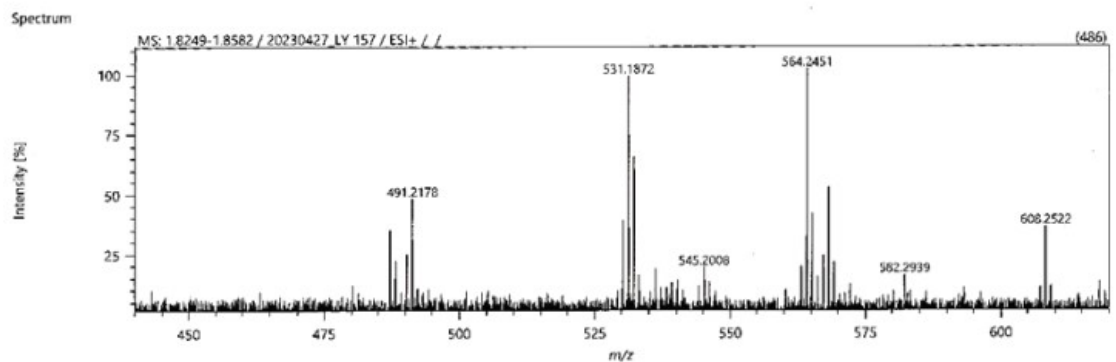

Elemental Composition

| Parameters |                 | Elements Set 1: |     |     |   |   |   |    |
|------------|-----------------|-----------------|-----|-----|---|---|---|----|
|            |                 | Symbol          | C   | H   | O | N | B | Na |
| Tolerance: | $\pm 10.00$ ppm | Min             | 0   | 0   | 6 | 2 | 2 | 1  |
| Electron:  | Odd/Even        | Max             | 100 | 400 | 6 | 2 | 2 | 1  |
| Charge:    | +1              |                 |     |     |   |   |   |    |
| DBE:       | -99.9 - 999.0   |                 |     |     |   |   |   |    |

Results

| Mass      | Formula                                                             | Calculated Mass | Mass Difference [mDa] | Mass Difference [ppm] | DBE  |
|-----------|---------------------------------------------------------------------|-----------------|-----------------------|-----------------------|------|
| 531.18725 | $\text{C}_{28}\text{H}_{26}\text{B}_2\text{N}_2\text{O}_6\text{Na}$ | 531.18692       | 0.33                  | 0.62                  | 17.5 |

**Figure S96.** HRMS (ESI, positive ion)[ $\text{M} + \text{Na}$ ] $^+$  spectrum of compound **D2**



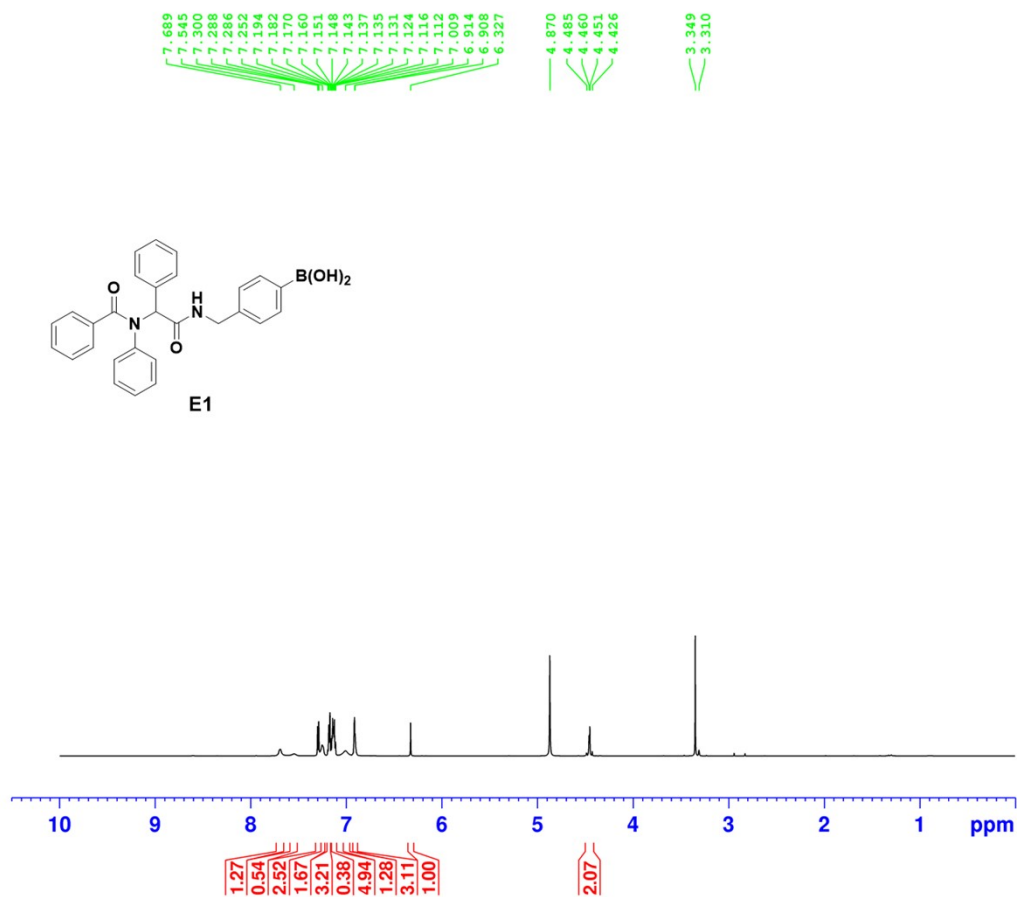

Figure S97. <sup>1</sup>H NMR (600 MHz, CDCl<sub>3</sub>) spectrum of compound E1

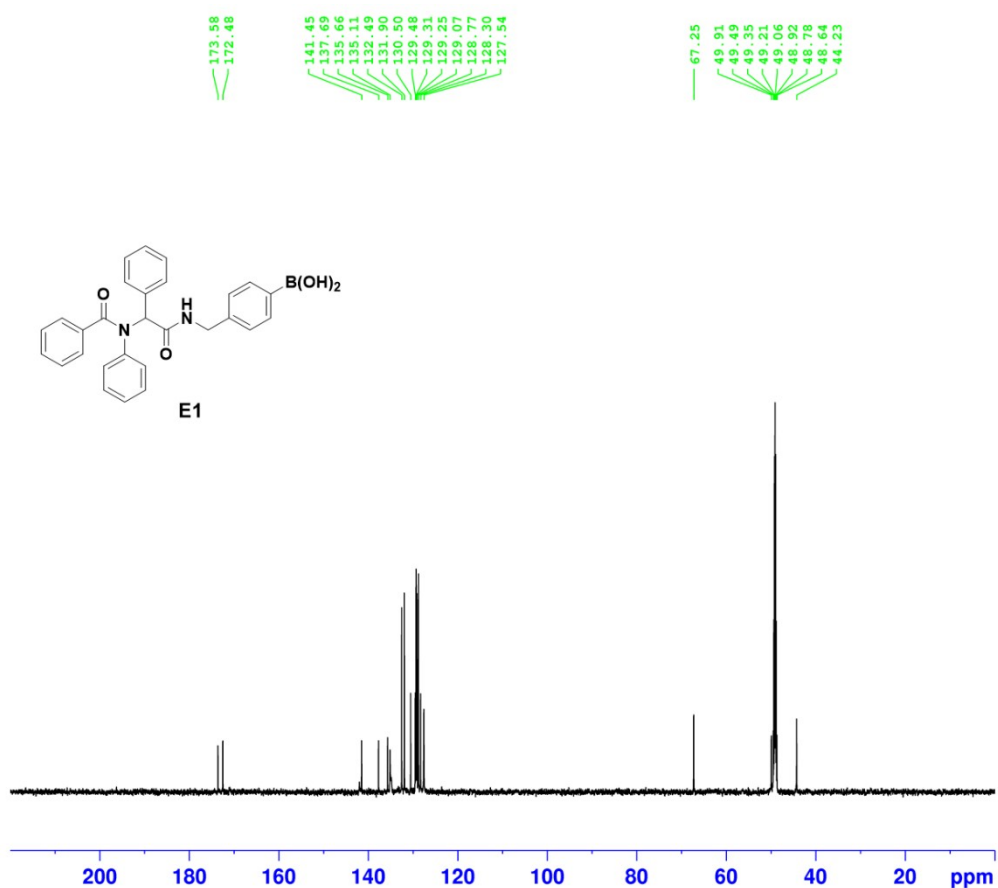

Figure S98. <sup>13</sup>C NMR (150 MHz, CDCl<sub>3</sub>) spectrum of compound E1

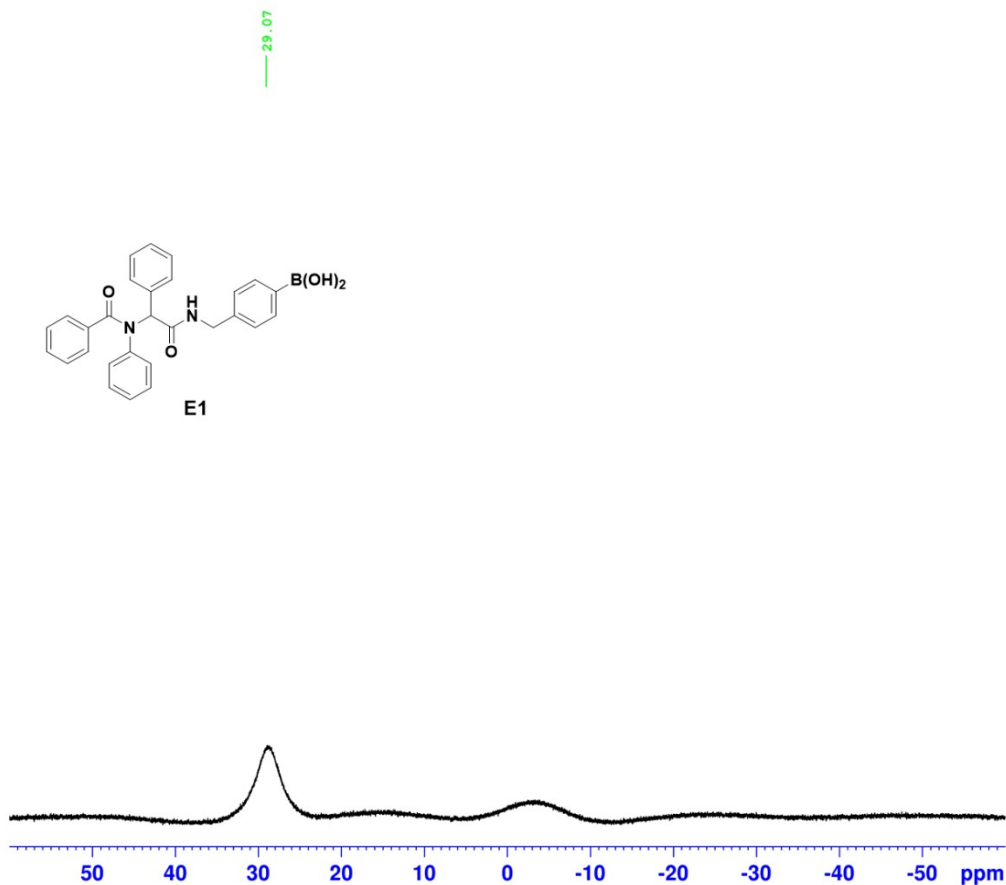

**Figure S99.**  $^{11}\text{B}$  NMR (192.5 MHz,  $\text{CDCl}_3$ ) spectrum of compound **E1**

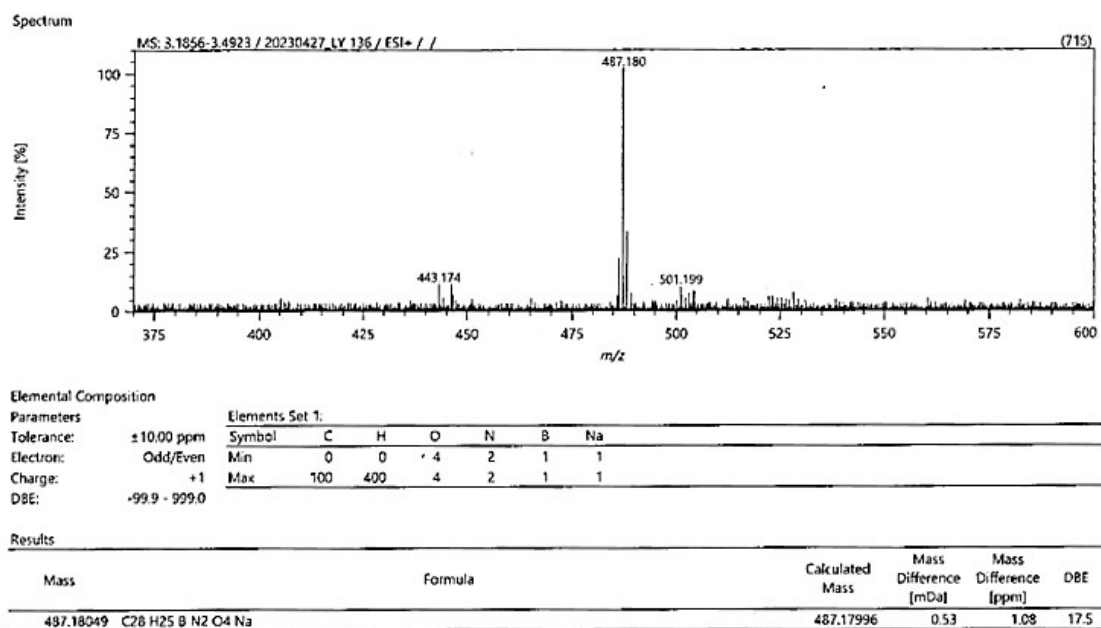

**Figure S100.** HRMS (ESI, positive ion)[ $\text{M} + \text{Na}$ ] $^+$  spectrum of compound **E1**

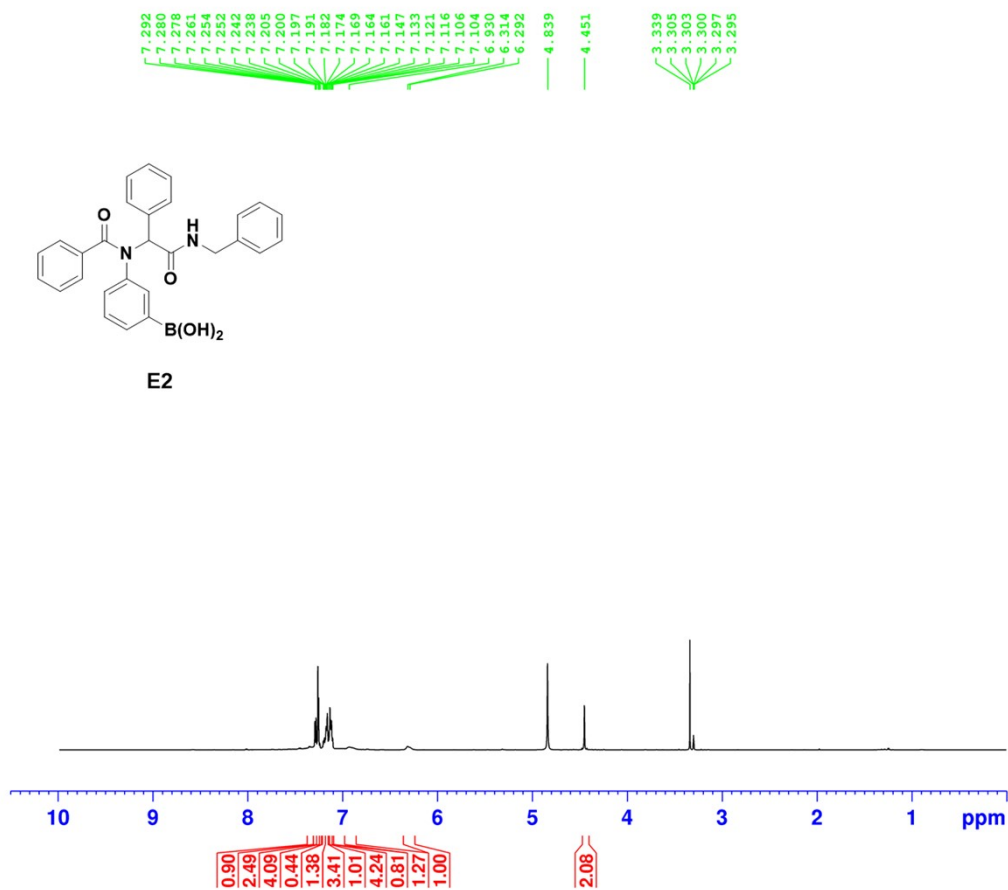

Figure S101. <sup>1</sup>H NMR (600 MHz, CDCl<sub>3</sub>) spectrum of compound E2

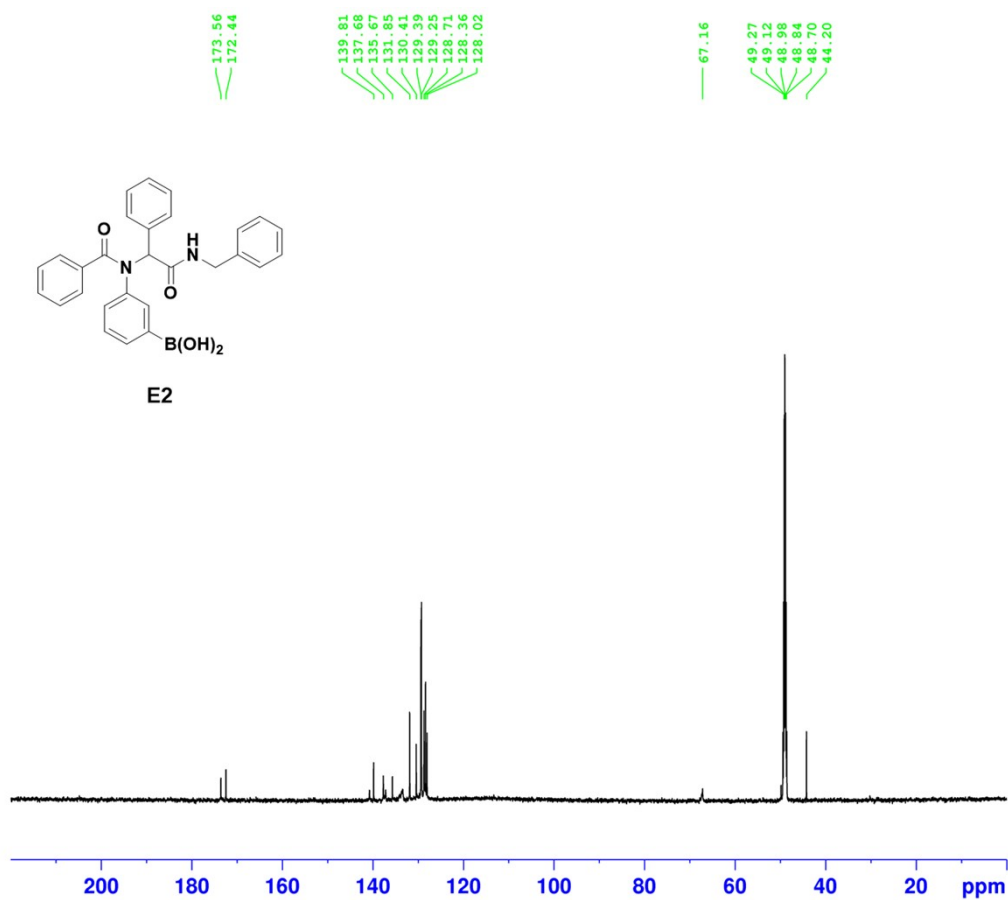

Figure S102. <sup>13</sup>C NMR (150 MHz, CDCl<sub>3</sub>) spectrum of compound E2

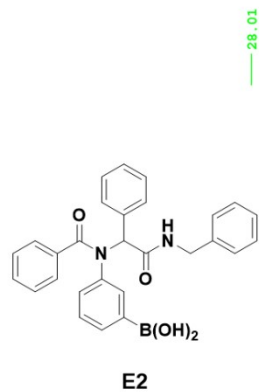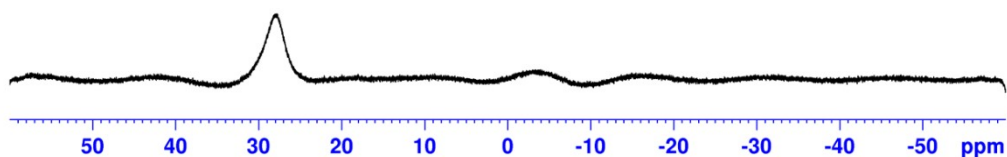

**Figure S103.**  $^{11}\text{B}$  NMR (192.5 MHz,  $\text{CDCl}_3$ ) spectrum of compound E2

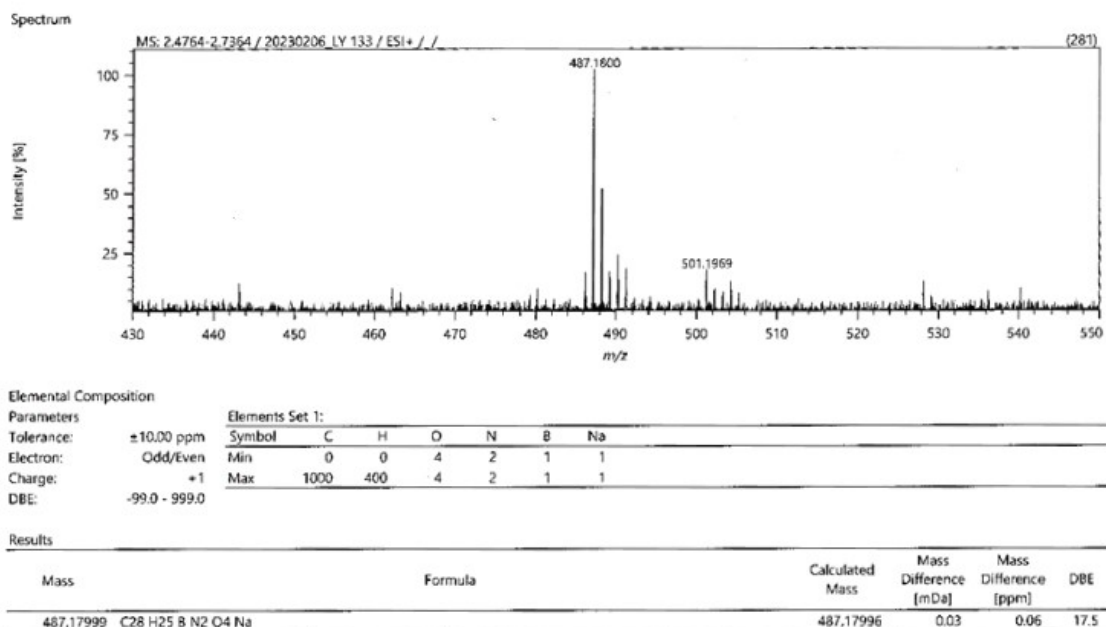

**Figure S104.** HRMS (ESI, positive ion)[ $\text{M} + \text{Na}$ ] $^+$  spectrum of compound E2

## $K_{ARS}$ and $K_{eq}$ (Sialic acid) titration curve at pH 6.0 and pH 6.5

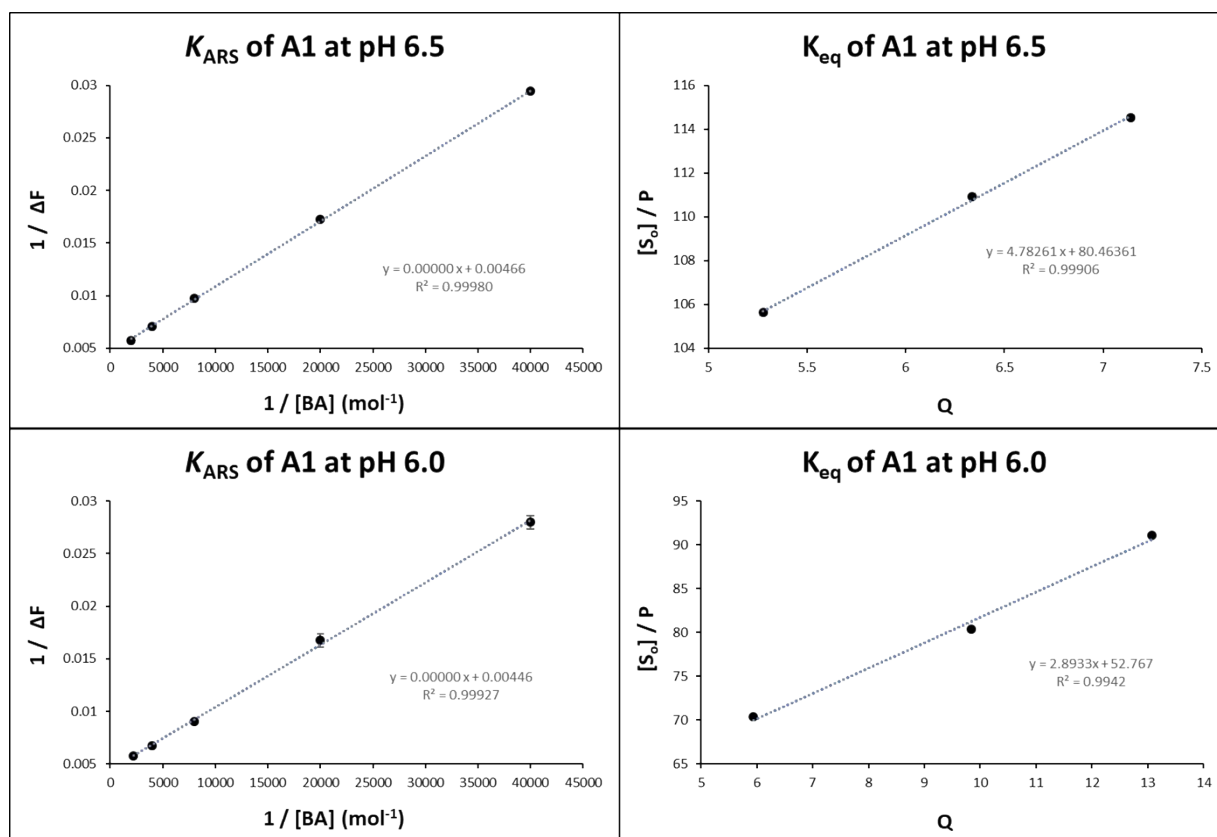

**Figure S105.**  $K_{ARS}$  and  $K_{eq}$  (Sialic acid) titration curves of compound **A1** at pH 6.0 and pH 6.5 (three repetitions)

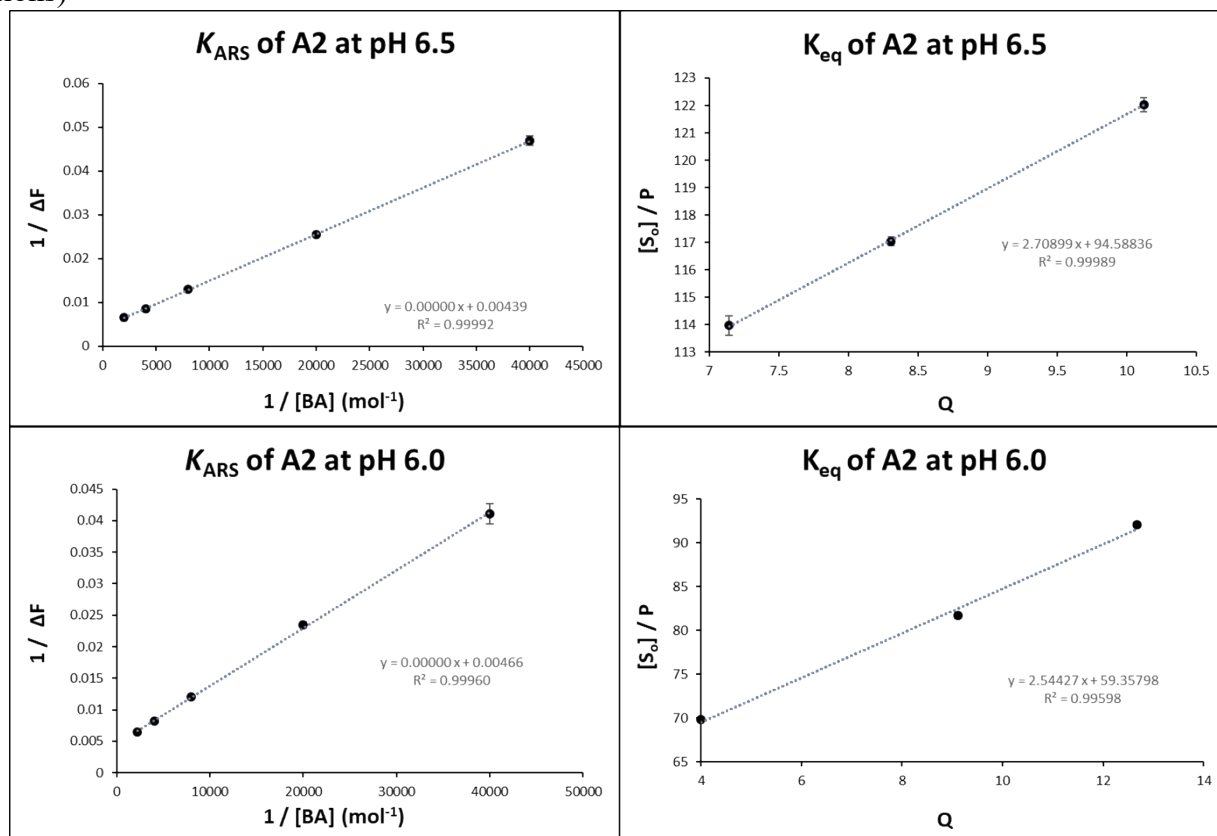

**Figure S106.**  $K_{ARS}$  and  $K_{eq}$  (Sialic acid) titration curves of compound **A2** at pH 6.0 and pH 6.5 (three repetitions)

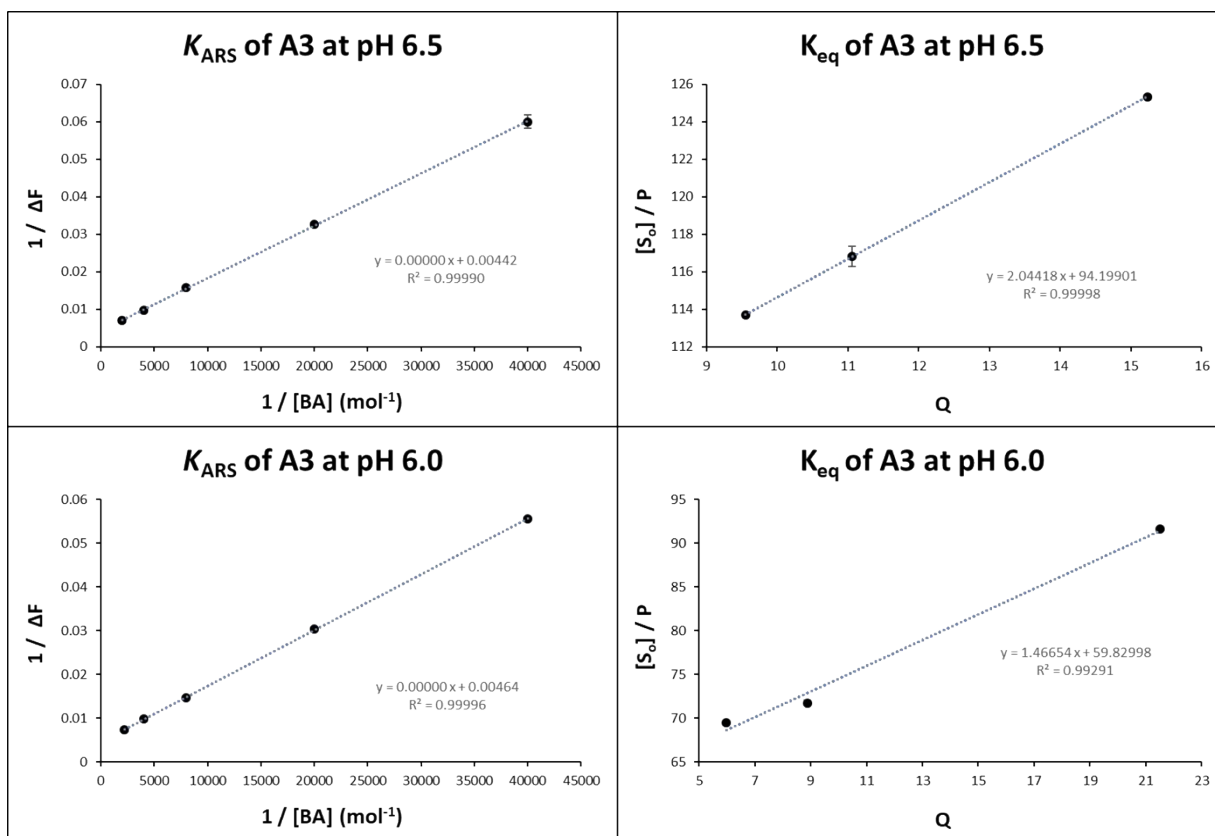

**Figure S107.**  $K_{ARS}$  and  $K_{eq}$  (Sialic acid) titration curves of compound **A3** at pH 6.0 and pH 6.5 (three repetitions)

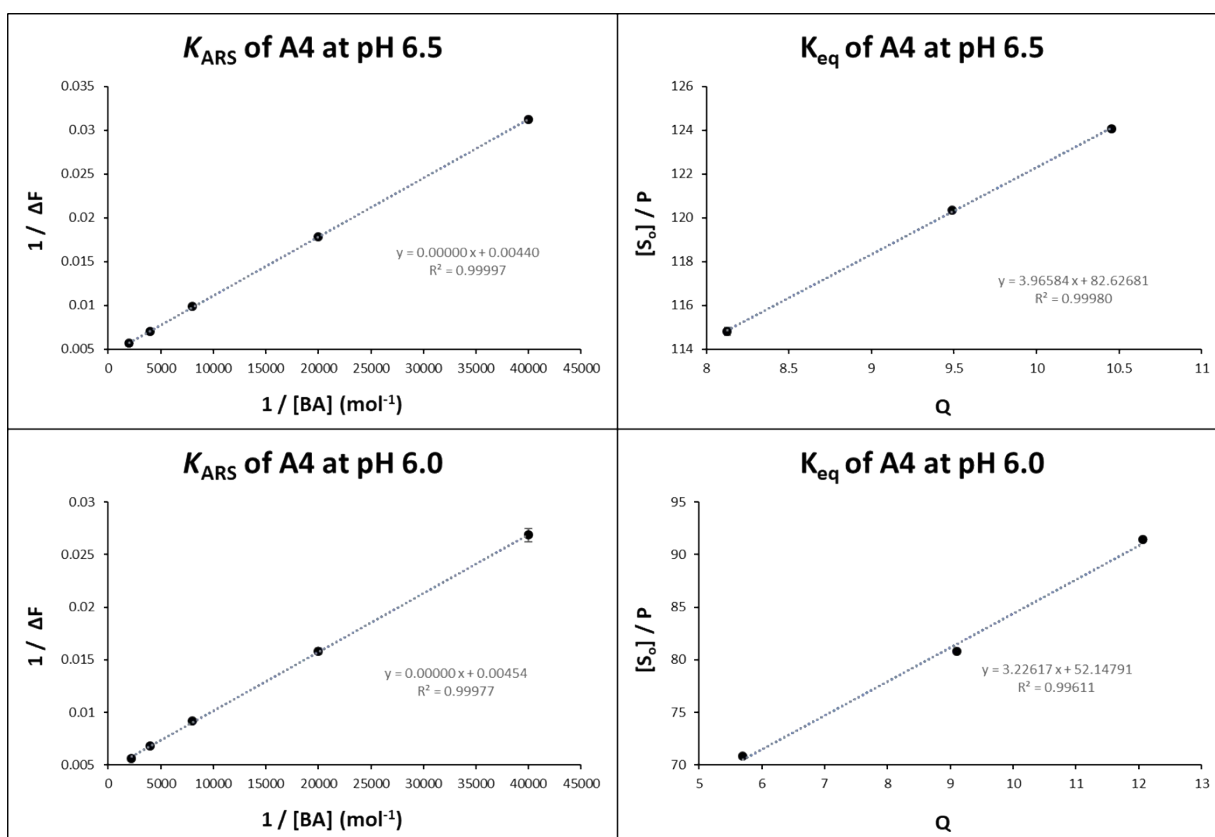

**Figure S108.**  $K_{ARS}$  and  $K_{eq}$  (Sialic acid) titration curves of compound **A4** at pH 6.0 and pH 6.5 (three repetitions)

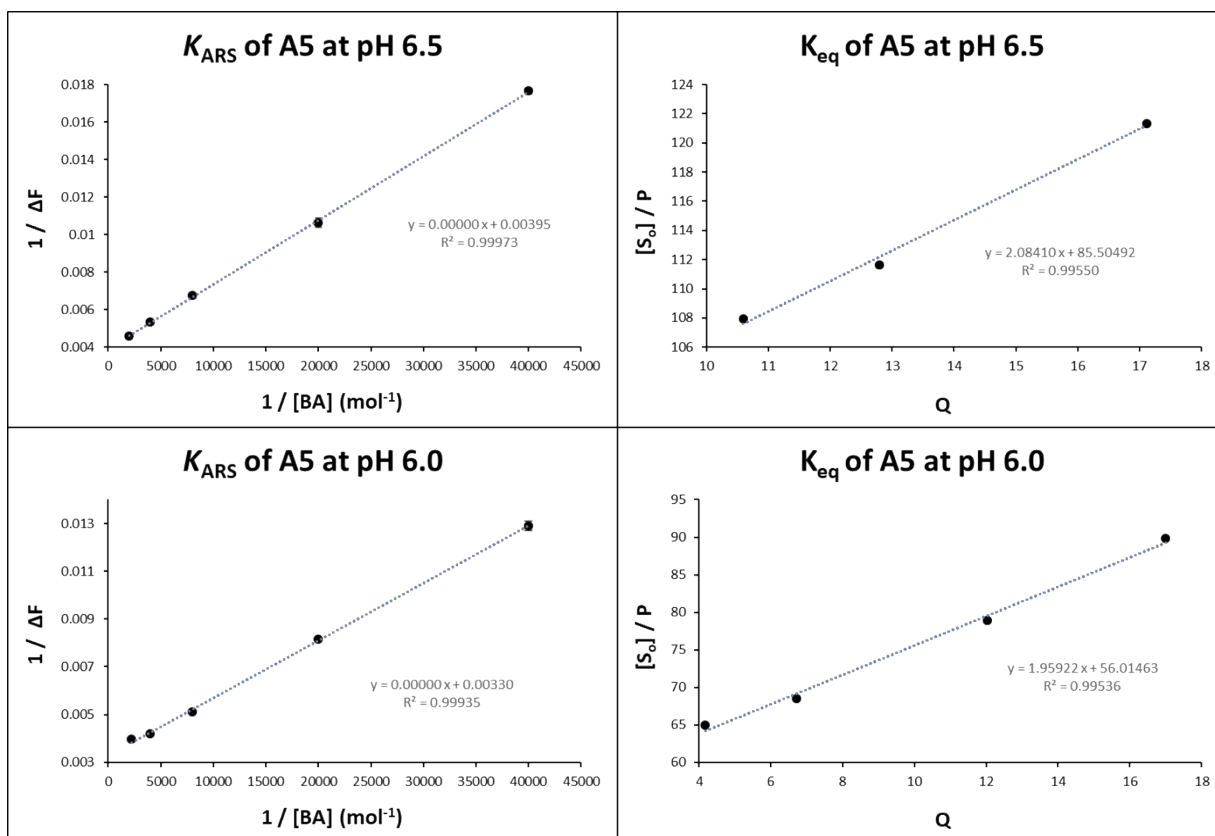

**Figure S109.**  $K_{ARS}$  and  $K_{eq}$  (Sialic acid) titration curves of compound **A5** at pH 6.0 and pH 6.5 (three repetitions)

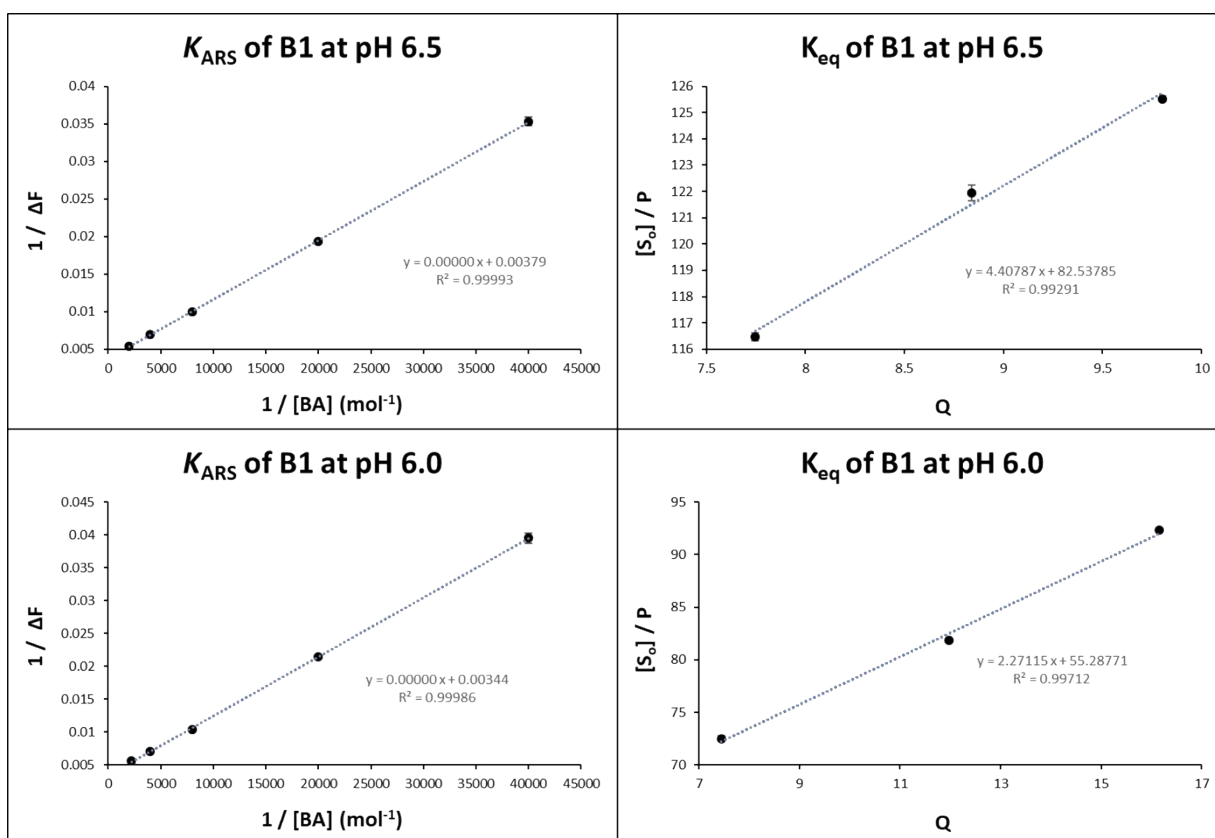

**Figure S110.**  $K_{ARS}$  and  $K_{eq}$  (Sialic acid) titration curves of compound **B1** at pH 6.0 and pH 6.5 (three repetitions)





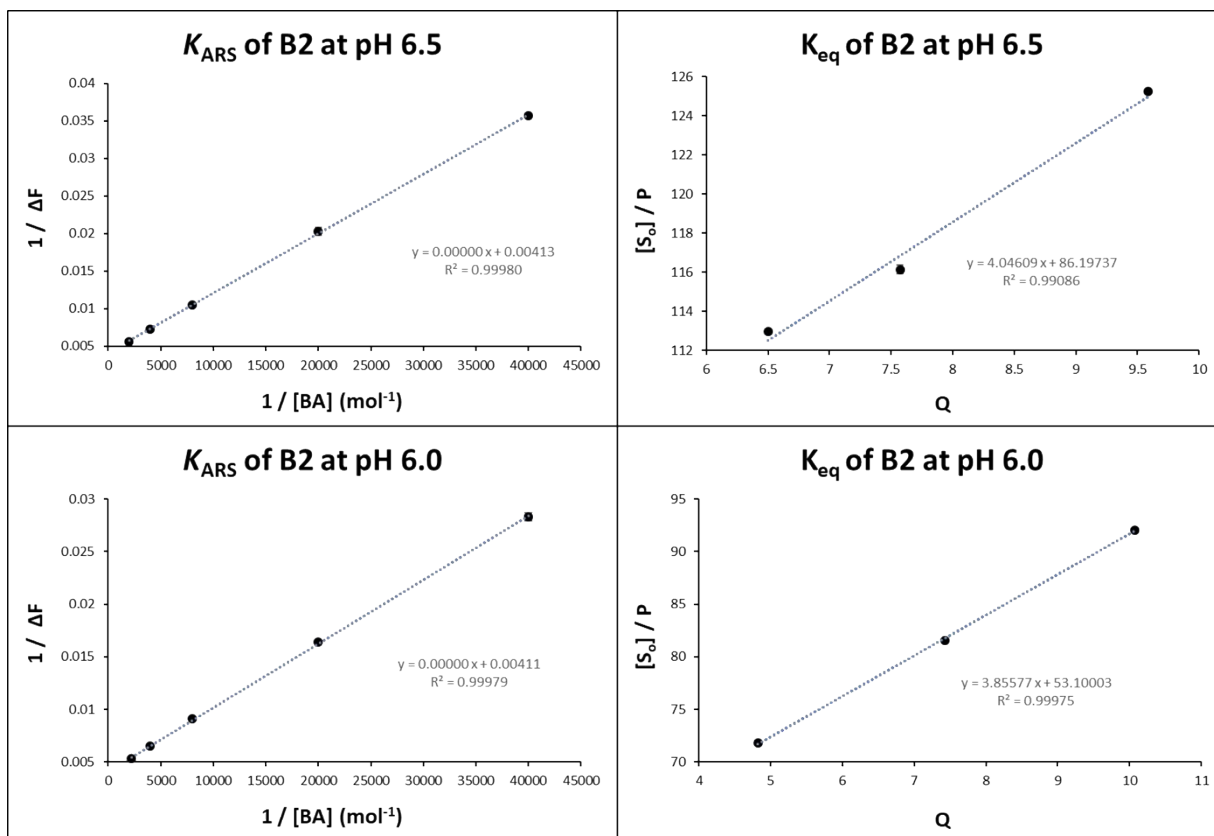

**Figure S111.**  $K_{ARS}$  and  $K_{eq}$  (Sialic acid) titration curves of compound **B2** at pH 6.0 and pH 6.5 (three repetitions)

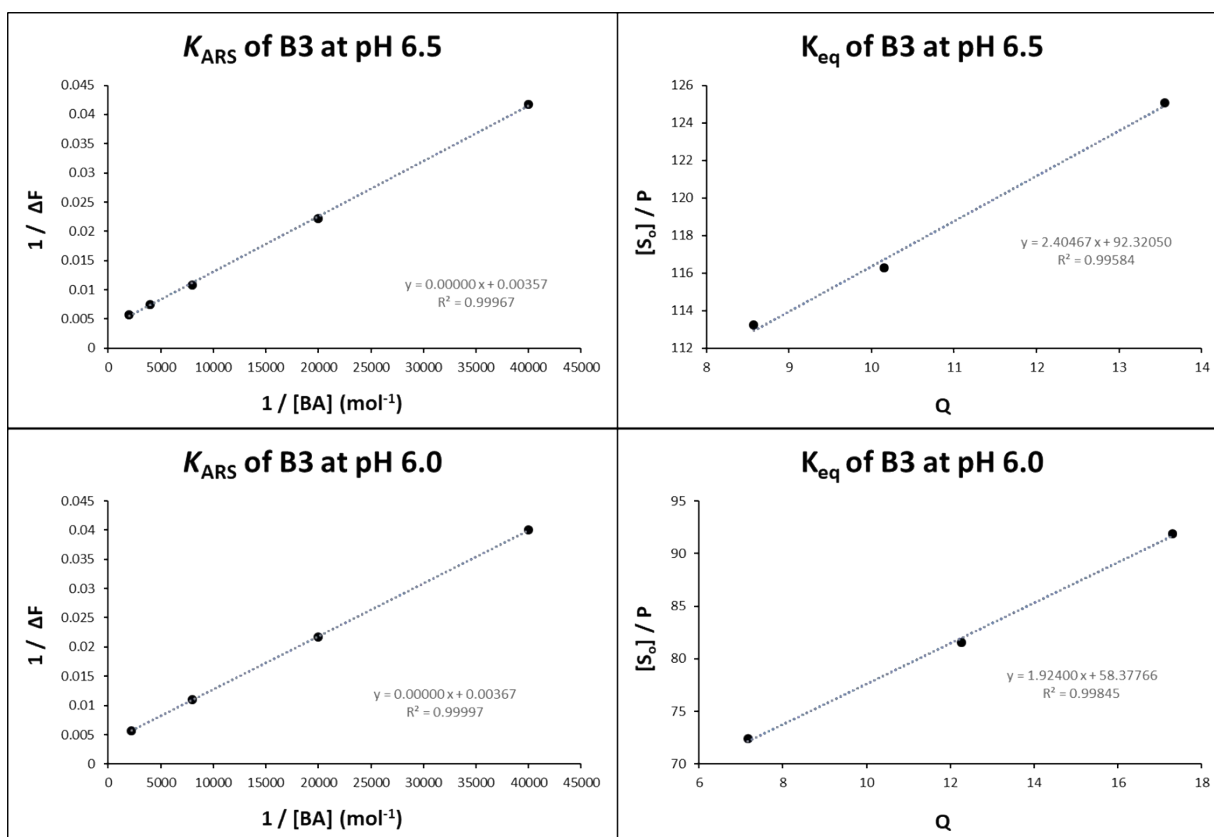

**Figure S112.**  $K_{ARS}$  and  $K_{eq}$  (Sialic acid) titration curves of compound **B3** at pH 6.0 and pH 6.5 (three repetitions)

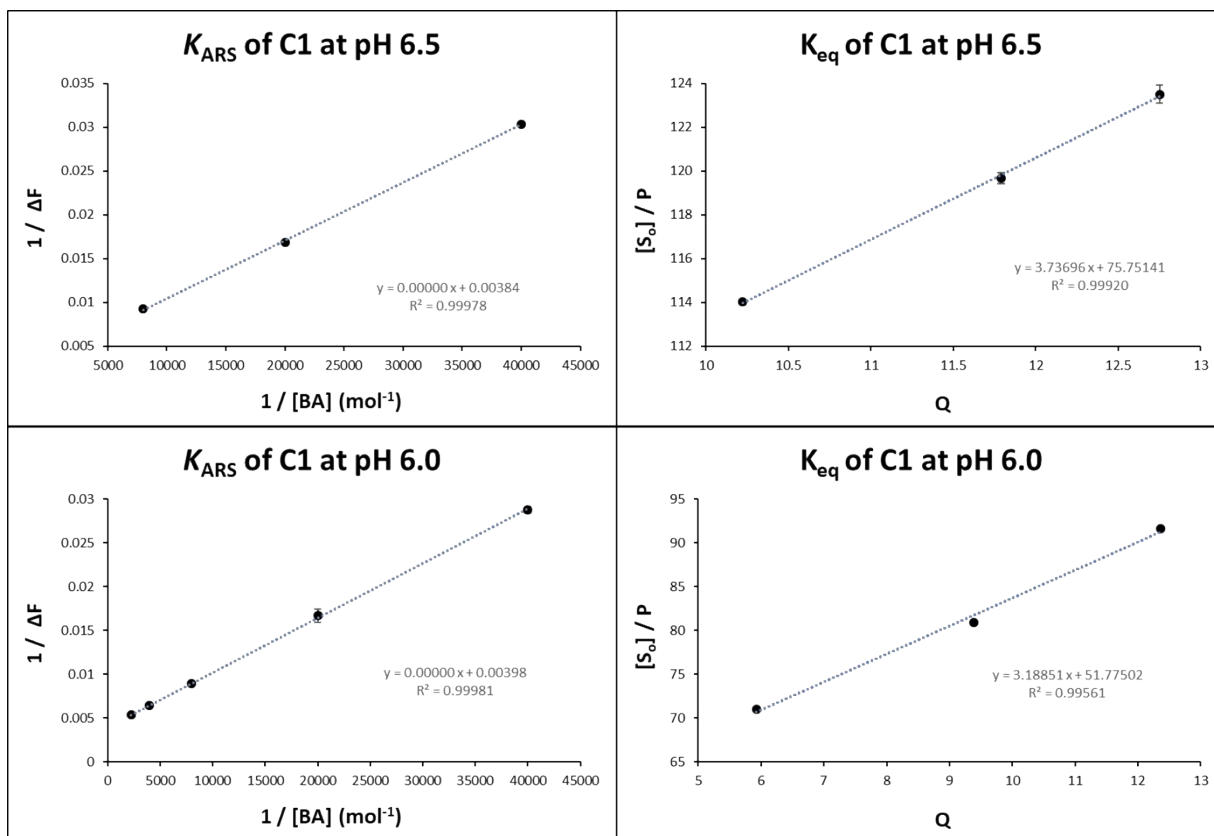

**Figure S113.**  $K_{ARS}$  and  $K_{eq}$  (Sialic acid) titration curves of compound **C1** at pH 6.0 and pH 6.5 (three repetitions)

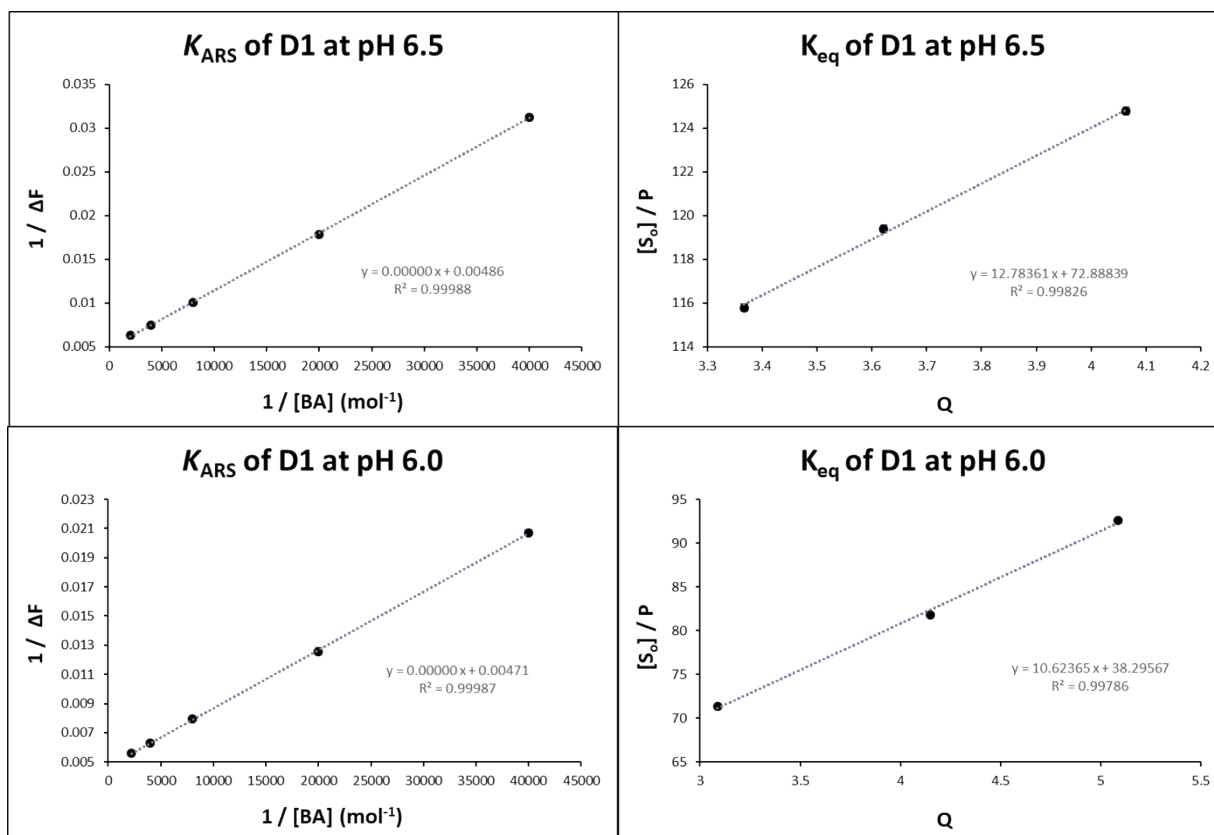

**Figure S114.**  $K_{ARS}$  and  $K_{eq}$  (Sialic acid) titration curves of compound **D1** at pH 6.0 and pH 6.5 (three repetitions)

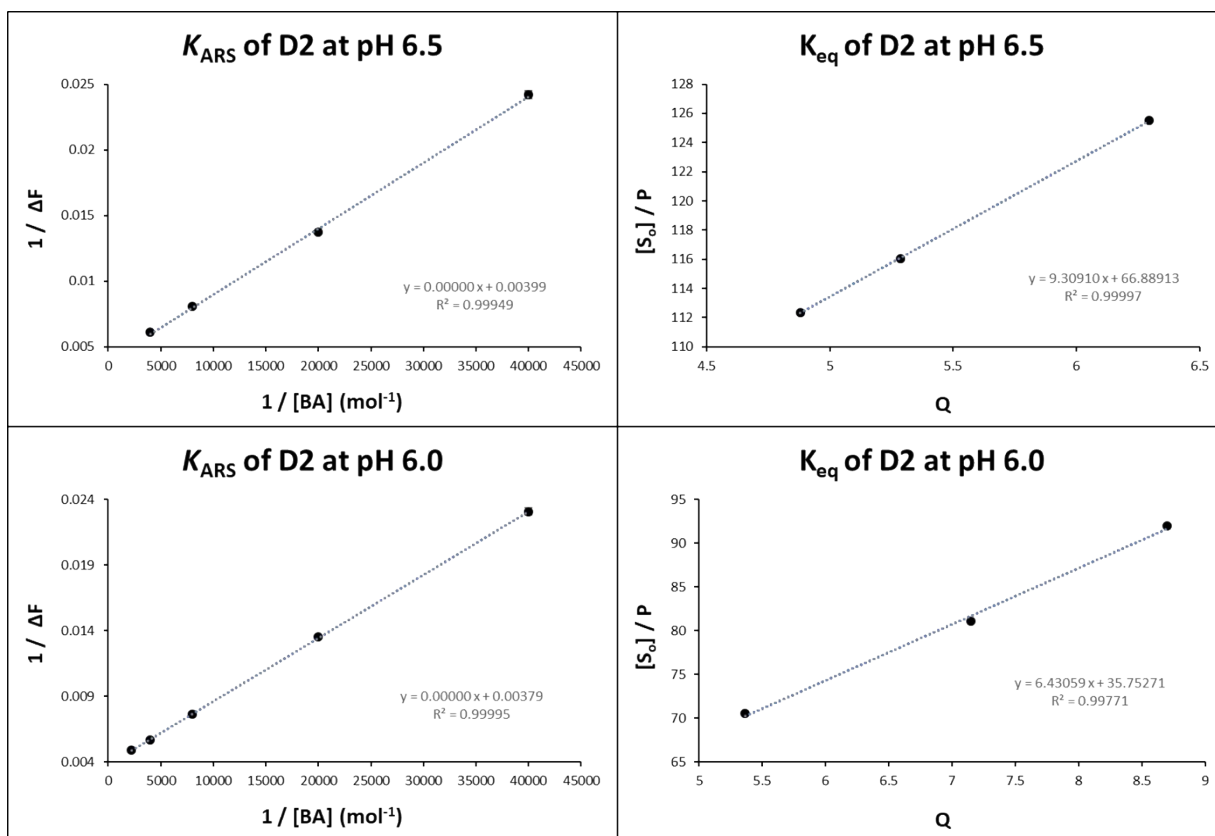

**Figure S115.**  $K_{ARS}$  and  $K_{eq}$  (Sialic acid) titration curves of compound **D2** at pH 6.0 and pH 6.5 (three repetitions)

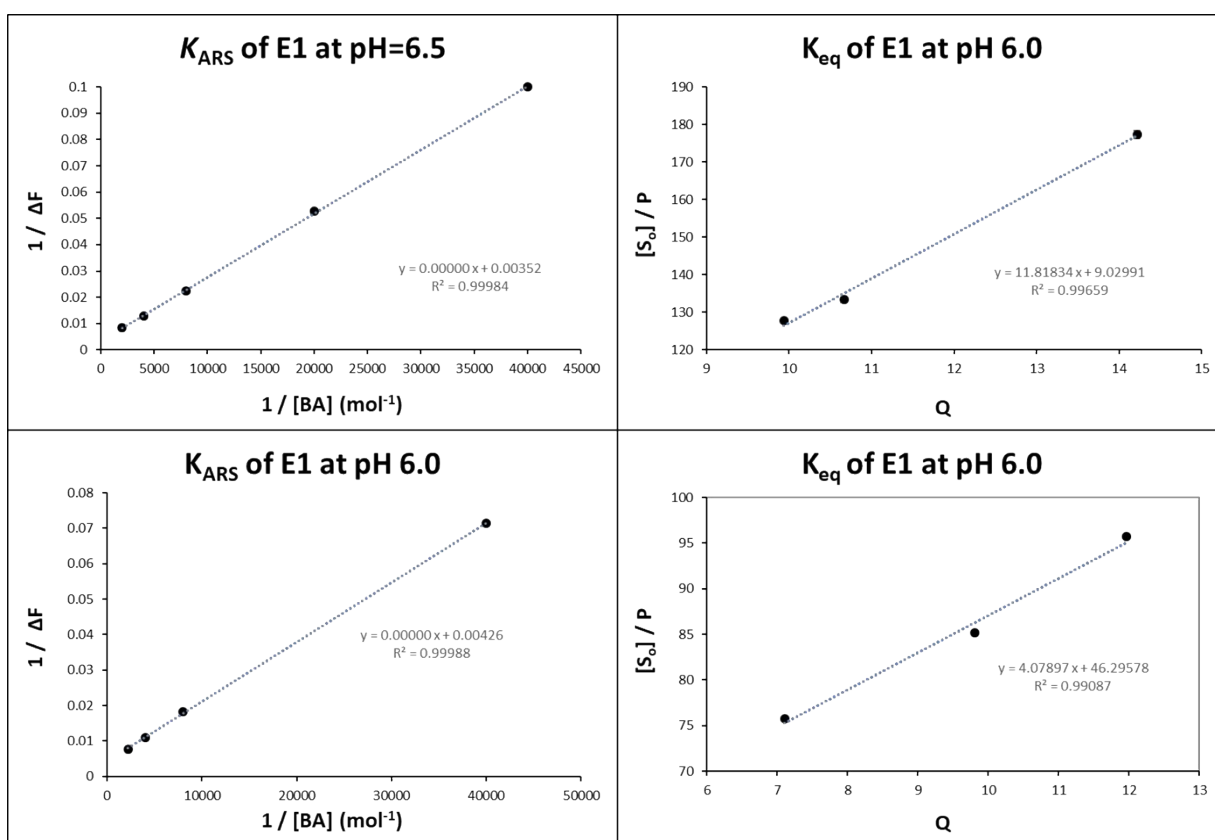

**Figure S116.**  $K_{ARS}$  and  $K_{eq}$  (Sialic acid) titration curves of compound **E1** at pH 6.0 and pH 6.5 (three repetitions)

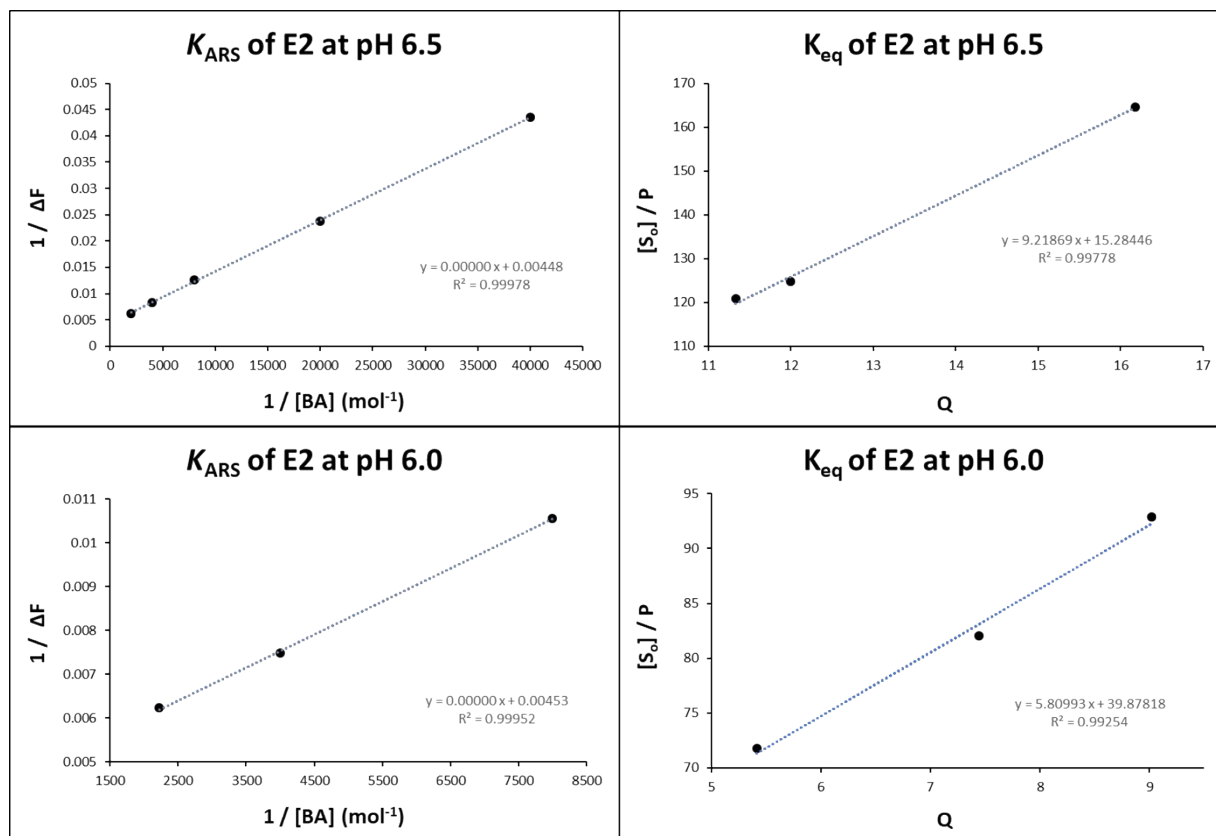

**Figure S117.**  $K_{ARS}$  and  $K_{eq}$  (Sialic acid) titration curves of compound **E2** at pH 6.0 and pH 6.5 (three repetitions)

**Table S1.** The binding constant ( $M^{-1}$ ) of boron-containing Ugi compounds to sialic acid at pH 6.0 and pH 6.5

| Series | cpd | $K_{eq}$ with SA ( $M^{-1}$ ) |          |
|--------|-----|-------------------------------|----------|
|        |     | pH 6.0                        | pH 6.5   |
| A      | A1  | 2602±100                      | 1570±146 |
|        | A2  | 2071±165                      | 1527±79  |
|        | A3  | 2485±34                       | 1552±153 |
|        | A4  | 2152±72                       | 1551±69  |
|        | A5  | 7015±5                        | 5559±35  |
| B      | B1  | 1686±104                      | 1094±229 |
|        | B2  | 1756±25                       | 1286±23  |
|        | B3  | 2102±151                      | 1565±26  |
| C      | C1  | 2008±20                       | 1556±190 |
| D      | D1  | 1112±86                       | 577±16   |
|        | D2  | 1249±16                       | 823±13   |
| E      | E1  | 652±2                         | 123±17   |
|        | E2  | 1035±11                       | 499±34   |

### 3.3 $K_{ARS}$ and $K_{eq}$ (Sialic acid, Fructose, Galactose and Glucose) titration

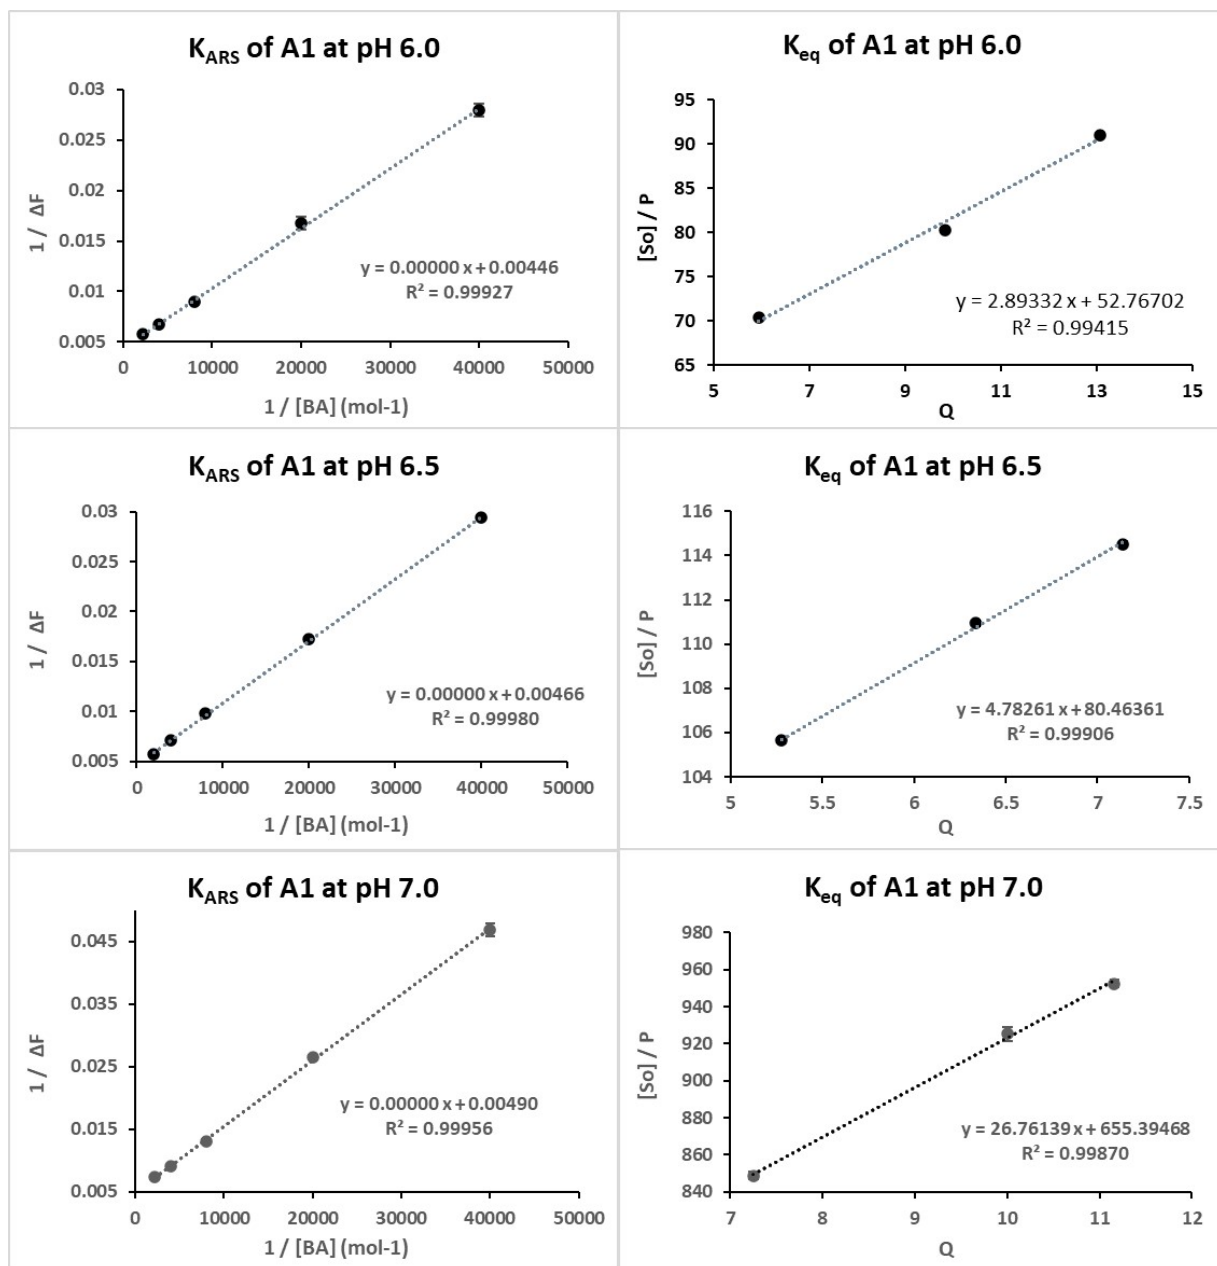

curve at pH 6.0, pH 6.5, pH 7.0, and pH 7.5

**Figure S118.**  $K_{ARS}$  and  $K_{eq}$  (Sialic acid) titration curves of compound **A1** at pH 6.0, pH 6.5, and pH 7.0 (three repetitions)

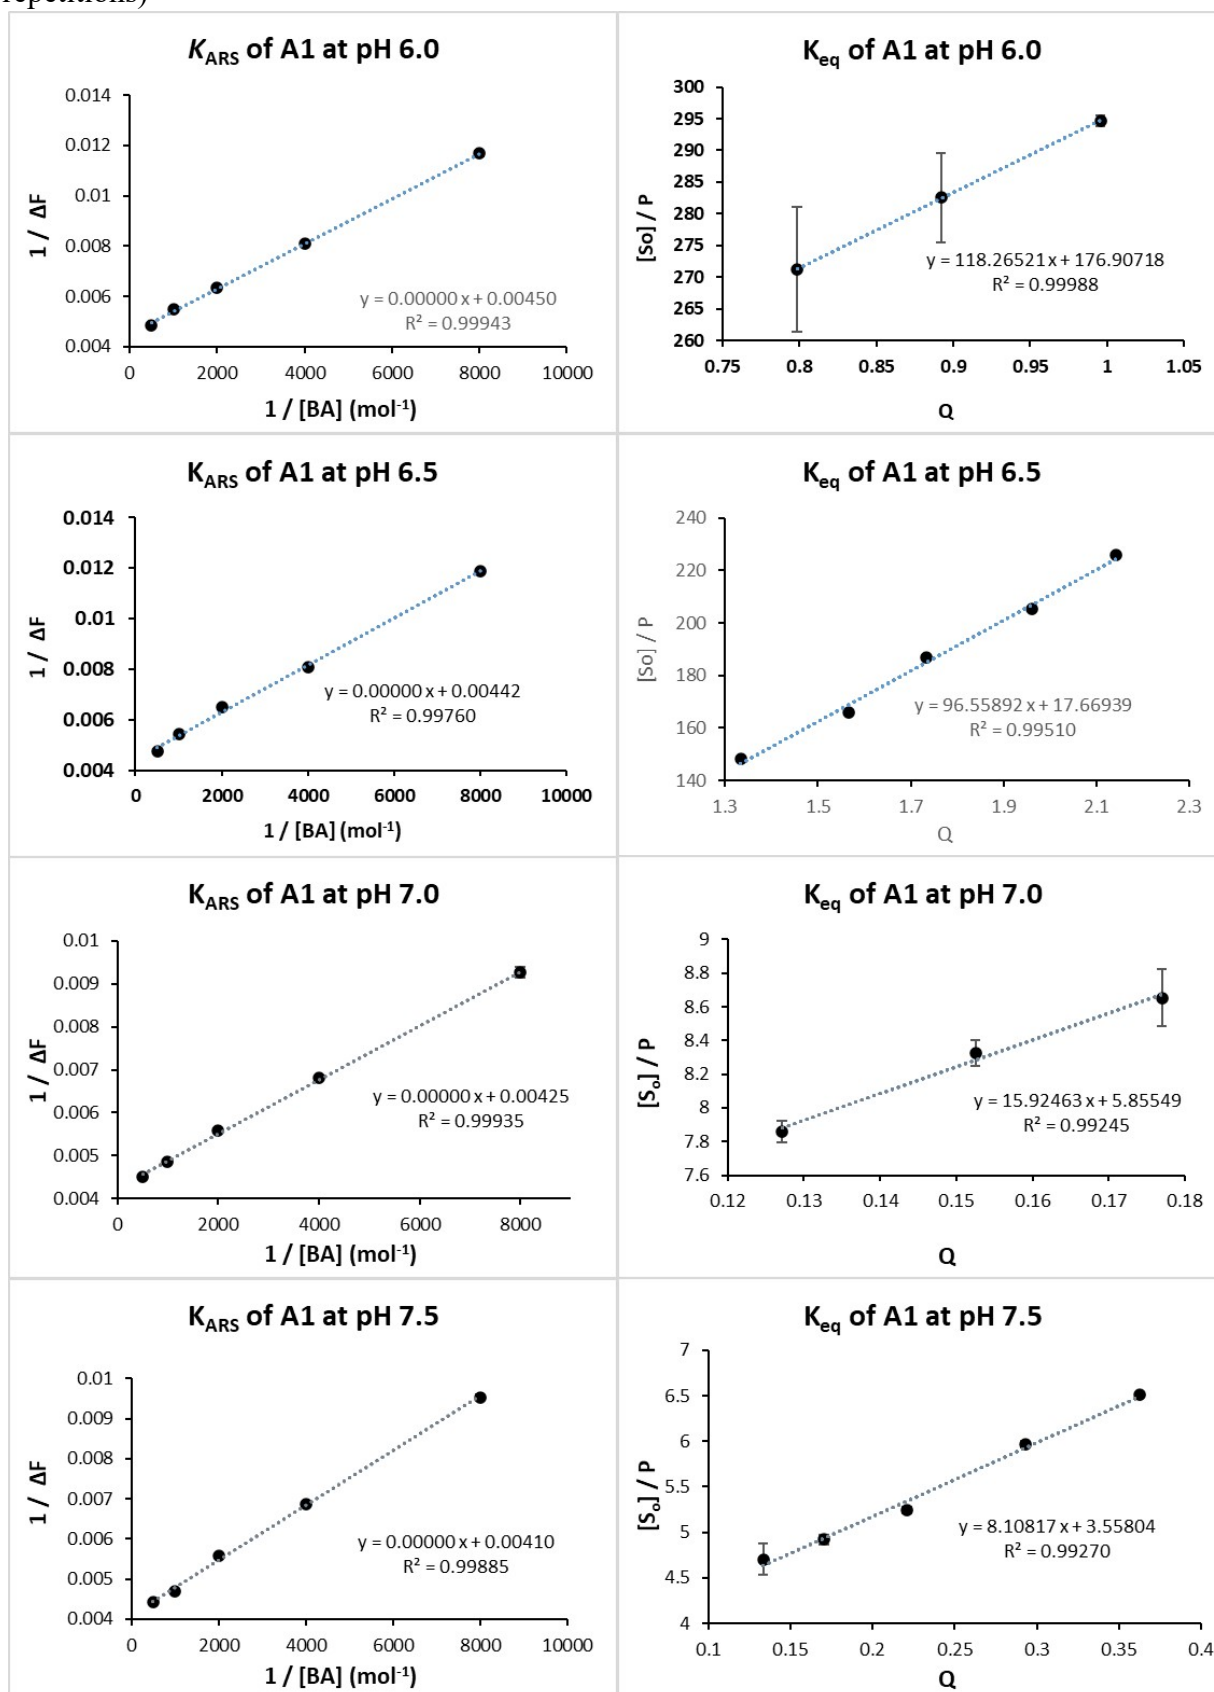

**Figure S119.**  $K_{ARS}$  and  $K_{eq}$  (Fructose) titration curves of compound **A1** at pH 6.0, pH 6.5, pH 7.0, and pH 7.5 (three repetitions)

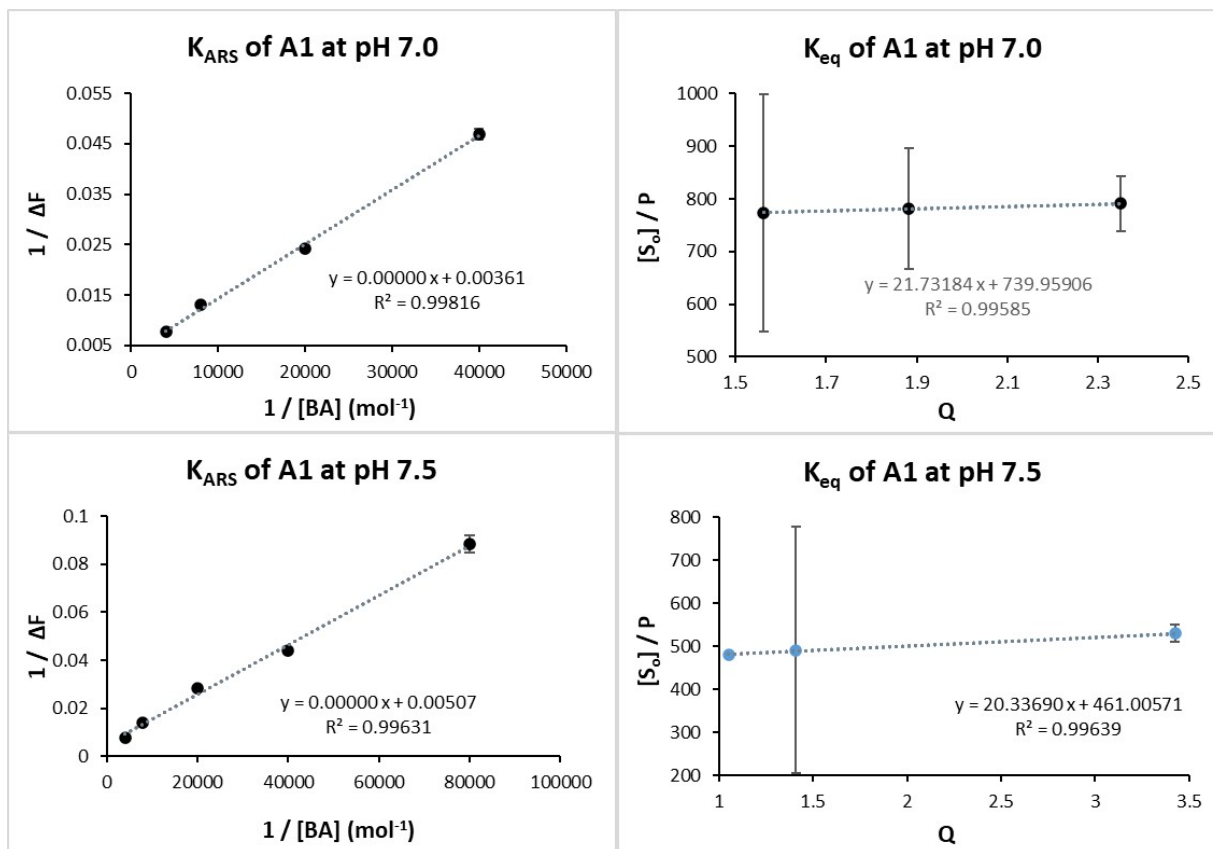

**Figure S120.**  $K_{ARS}$  and  $K_{eq}$  (Galactose) titration curves of compound **A1** at pH 7.0 and pH 7.5 (three repetitions)

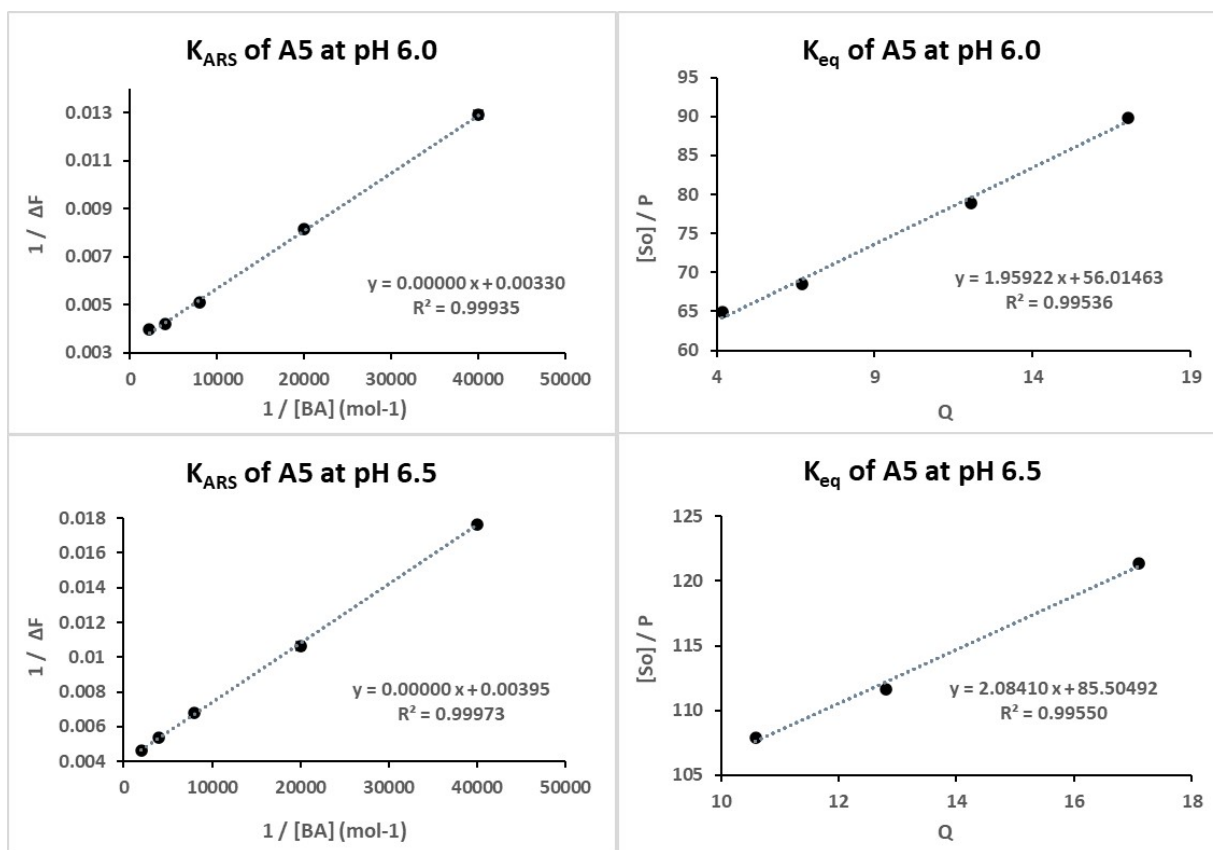

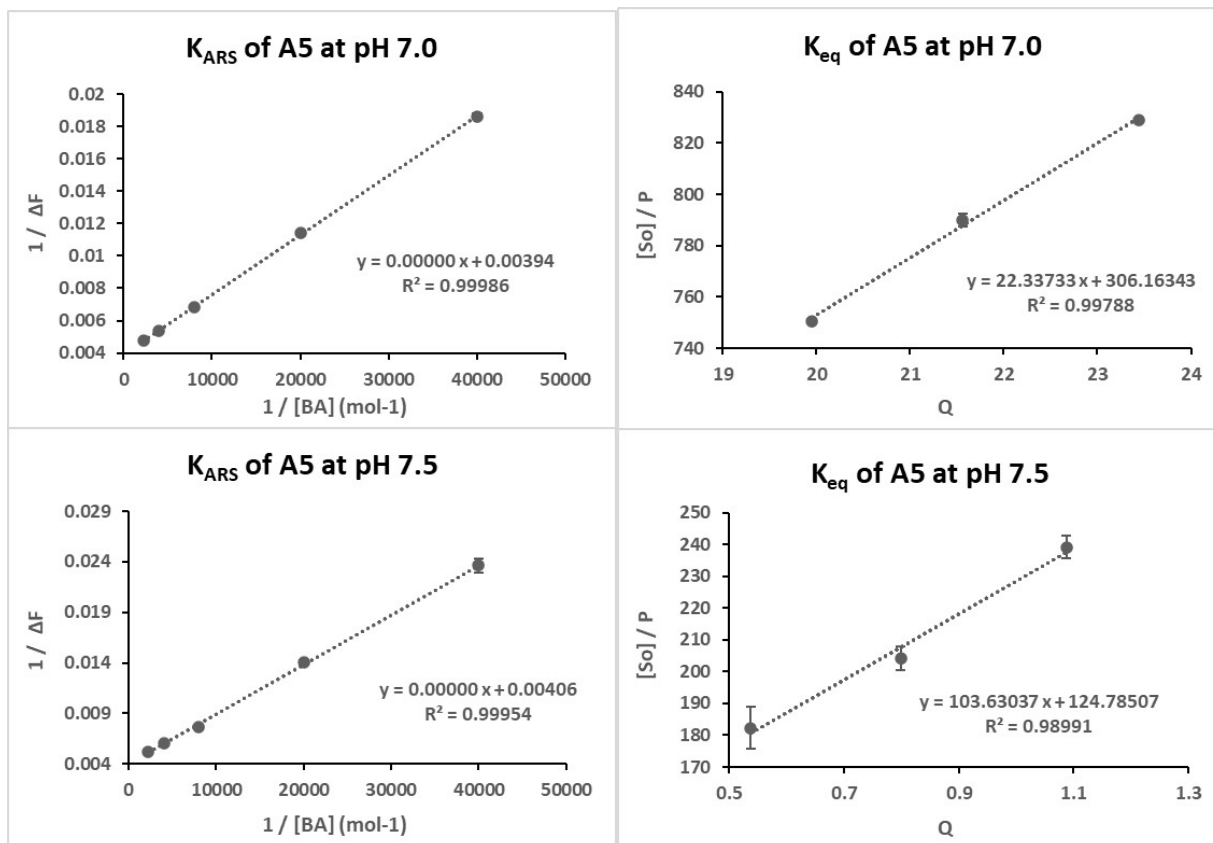

**Figure S121.**  $K_{ARS}$  and  $K_{eq}$  (Sialic acid) titration curves of compound A5 at pH 6.0, pH 6.5, pH 7.0, and pH 7.5 (three repetitions)

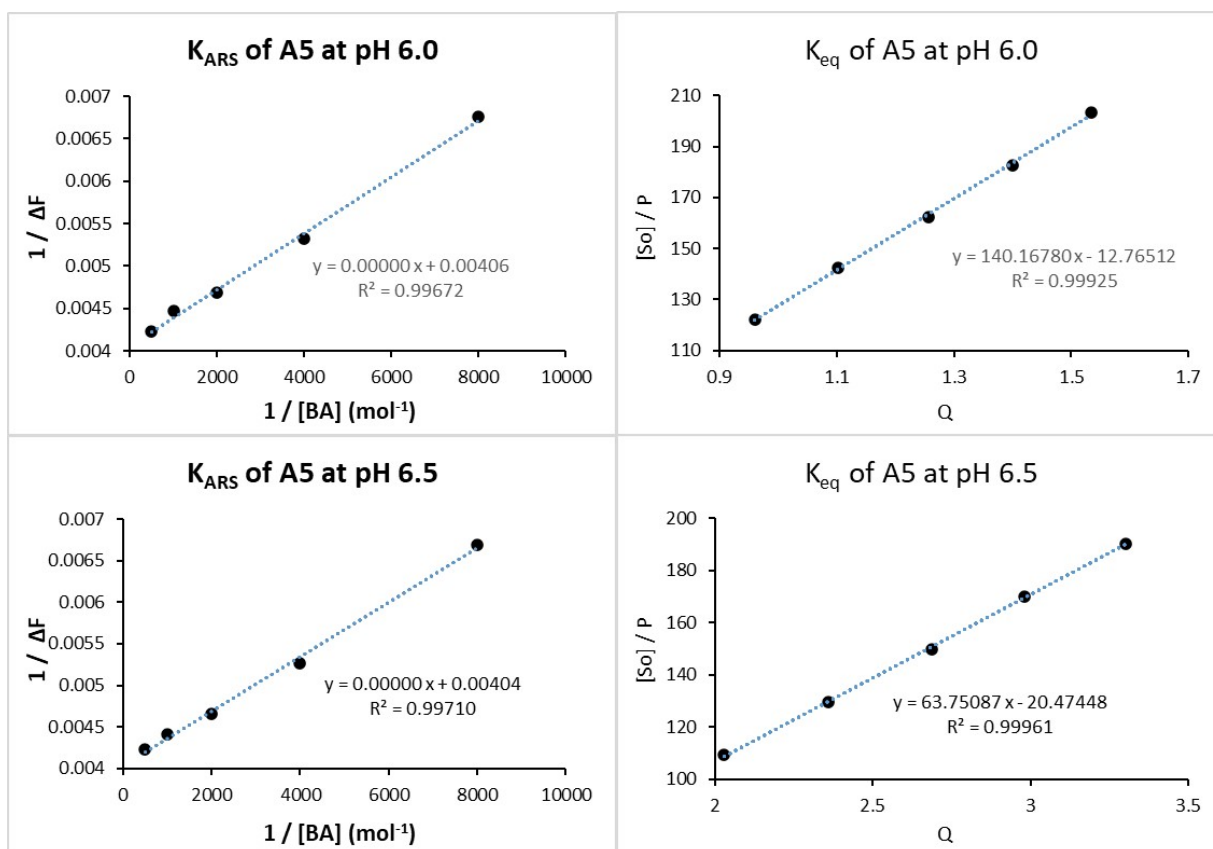



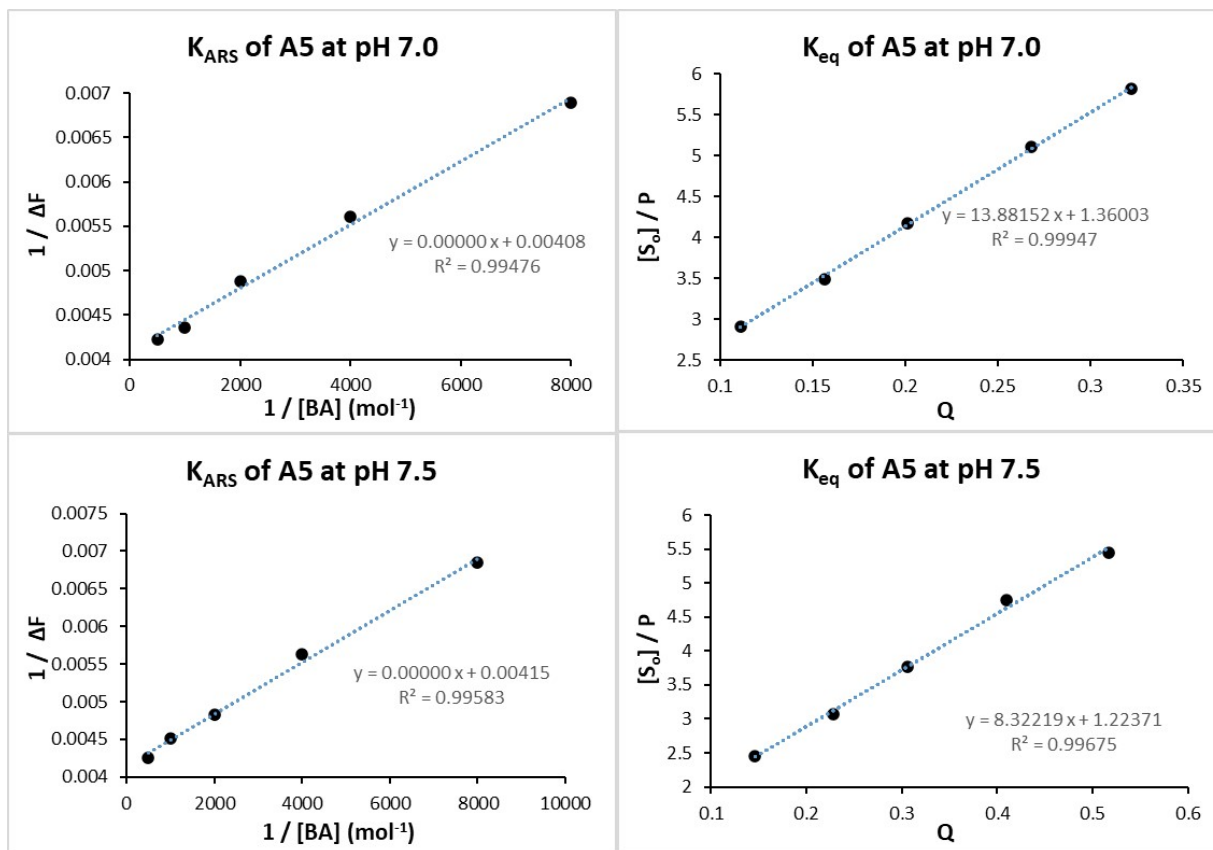

**Figure S122.**  $K_{ARS}$  and  $K_{eq}$  (Fructose) titration curves of compound A5 at pH 6.0, pH 6.5, pH 7.0, and pH 7.5 (three repetitions)

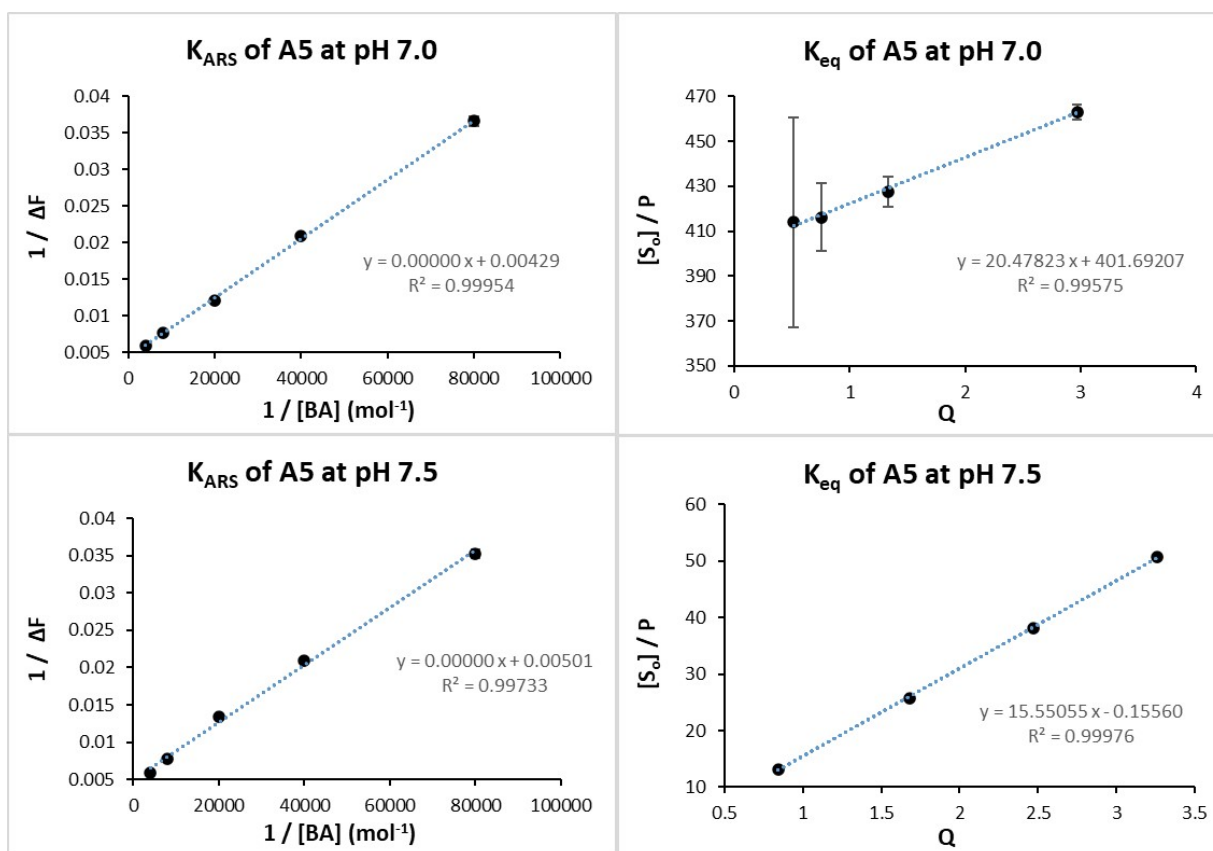

**Figure S123.**  $K_{ARS}$  and  $K_{eq}$  (Galactose) titration curves of compound A5 at pH 7.0 and pH 7.5 (three repetitions)

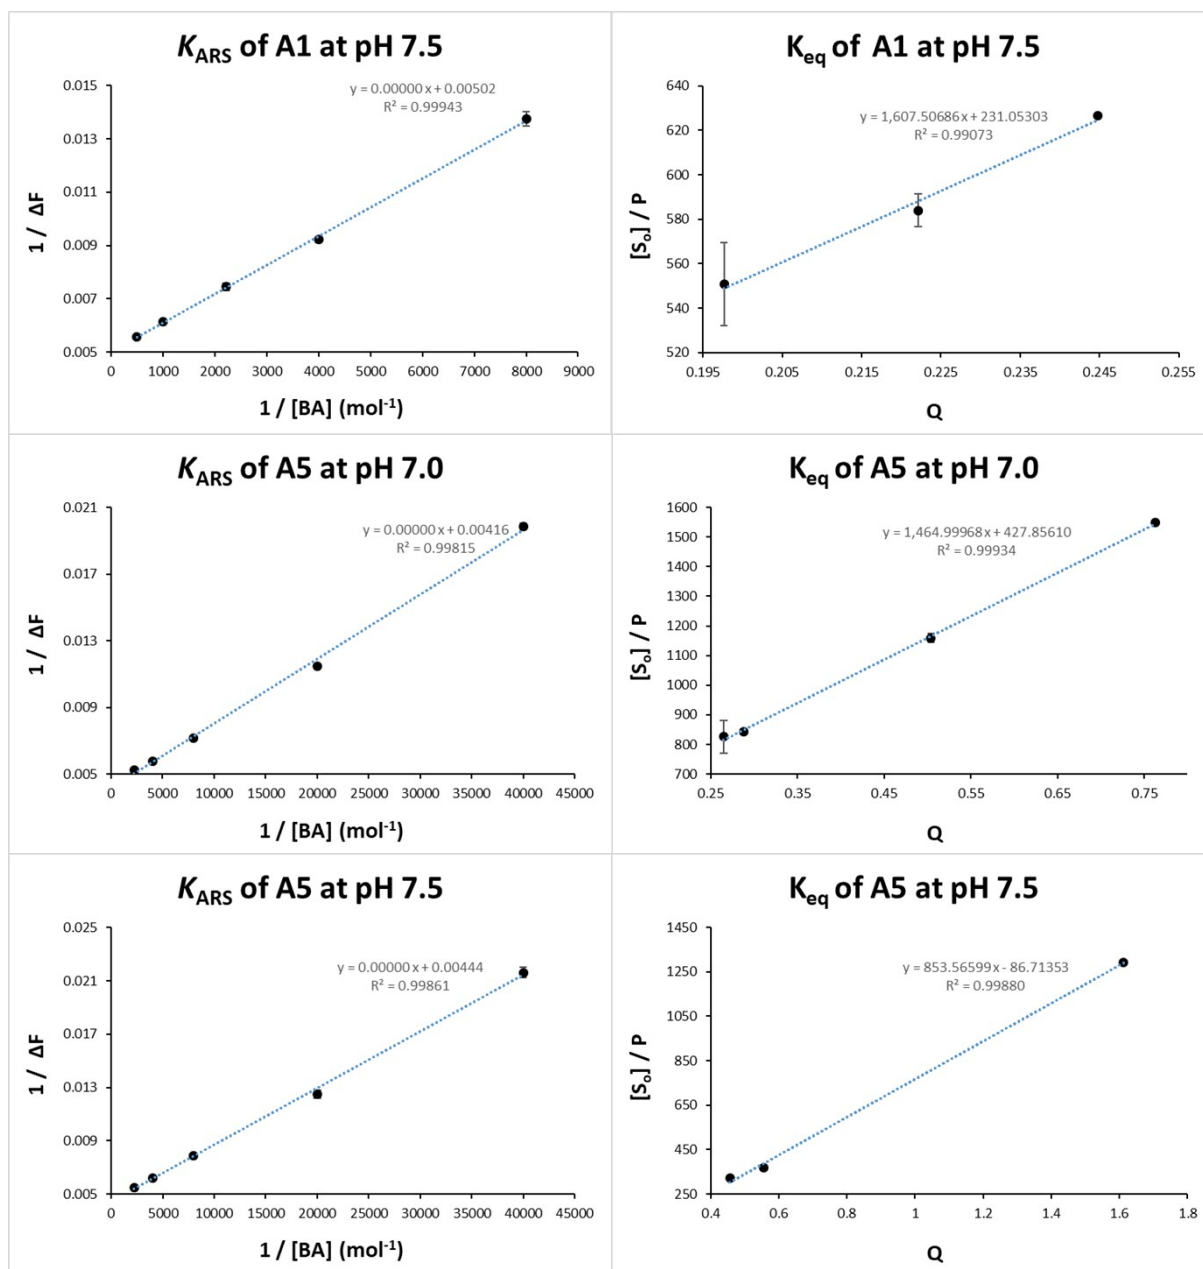

**Figure S124.**  $K_{ARS}$  and  $K_{eq}$  (Glucose) titration curves of compound A5 and A1 at pH 7.0 and pH 7.5 (three repetitions)

**Table S2.** The binding constant ( $M^{-1}$ ) of boron-containing Ugi compounds to sialic acid, Fructose, Galactose and Glucose at pH 6.0, pH 6.5, pH 7.0, and pH 7.5

| cpd | pH value | $K_{eq}$ with sialic acid ( $M^{-1}$ ) | $K_{eq}$ with Fructose ( $M^{-1}$ ) | $K_{eq}$ with Galactose ( $M^{-1}$ ) | $K_{eq}$ with Glucose ( $M^{-1}$ ) |
|-----|----------|----------------------------------------|-------------------------------------|--------------------------------------|------------------------------------|
| A1  | pH 6.0   | 2602±100                               | 45±22                               | n/d                                  | n/d                                |
|     | pH 6.5   | 1570±146                               | 49±0                                | n/d                                  | n/d                                |
|     | pH 7.0   | 174±5                                  | 424±74                              | 162±17                               | n/d                                |
|     | pH 7.5   | n/d                                    | 741±56                              | 241±64                               | 3±0                                |
| A5  | pH 6.0   | 7016±5                                 | 87±1                                | n/d                                  | n/d                                |
|     | pH 6.5   | 5559±35                                | 193±1                               | n/d                                  | n/d                                |
|     | pH 7.0   | 479±9                                  | 821±0                               | 518±391                              | 7±0                                |
|     | pH 7.5   | 80±1                                   | 1455±5                              | 755±13                               | 22±0                               |

## 4. Computational details

### Reaction energy

The following are the calculated energies of sialic acid, A1, H<sub>2</sub>O and their complexes. The reaction energy in this article is judged by kcal/mole in the last line.

**Table S3.** DFT calculation of the reaction energy of two binding site on A1 structure relative to sialic acid

| Solvent Effect               |           |                                         |          |
|------------------------------|-----------|-----------------------------------------|----------|
| T (K)                        | 298.15    | G_A1 Binding Sites (kcal/mol)           |          |
| P (atm)                      | 1         | A1(S) - R <sup>2</sup>                  | -2.18246 |
| G_H <sub>2</sub> O (Hartree) | -76.41    | A1(S) - R <sup>4</sup>                  | -1.87372 |
| G_SA(Hartree)                | -1161.31  | A1(R) - R <sup>2</sup>                  | -1.05734 |
| G_A1-S(Hartree)              | -1692.321 | A1(S) - R <sup>2</sup> + R <sup>4</sup> | -5.96065 |
| G_A1-R(Hartree)              | -1692.322 | A1(R) - R <sup>2</sup> + R <sup>4</sup> | -5.39966 |
| ε                            | 67.2      |                                         |          |

### Coordinate files

The following are the Cartesian coordinates of the optimized geometries :

|                                                   |             |             |             |             |             |             |             |            |            |             |             |
|---------------------------------------------------|-------------|-------------|-------------|-------------|-------------|-------------|-------------|------------|------------|-------------|-------------|
| • A1(R) (the number of imaginary frequencies = 0) | C           | -3.55787300 | 2.98906500  | 0.33067200  | H           | -0.68058100 | -0.94928500 | 3.55265400 |            |             |             |
|                                                   | C           | -2.65016600 | 2.59591600  | -0.66288700 | H           | 1.71958000  | 2.95503400  | 1.68324800 |            |             |             |
| C                                                 | -5.04813400 | -2.59301600 | 0.47604400  | C           | -2.12352900 | 1.30137800  | -0.59655100 | H          | 0.86206500 | 1.20629000  | 0.17714900  |
| H                                                 | -4.77024900 | -3.15197800 | 1.36357800  | H           | -3.63801700 | 0.16471200  | 2.21746400  | O          | 0.04259400 | -0.93923500 | -1.48705400 |
| C                                                 | -6.37157700 | -2.56788500 | 0.04911200  | H           | -4.61742700 | 2.44603000  | 2.12365000  | N          | 1.49337300 | -2.02406600 | -0.11535800 |
| C                                                 | -6.71867500 | -1.86897300 | -1.10508900 | H           | -3.98230100 | 3.98710500  | 0.29547200  | H          | 1.67668300 | -2.31985400 | 0.83408000  |
| C                                                 | -5.73849600 | -1.19346900 | -1.82795000 | H           | -1.42318100 | 0.92606500  | -1.33693000 | C          | 2.48392800 | -2.35782400 | -1.13019300 |
| C                                                 | -4.41750100 | -1.19811600 | -1.38999800 | O           | -2.84684600 | 4.82697700  | -1.81866700 | C          | 3.80063200 | -1.64133400 | -0.92828800 |
| C                                                 | -4.06848500 | -1.89441100 | -0.23191600 | O           | -1.35244700 | 3.31946300  | -2.79547800 | C          | 4.96784900 | -2.35711800 | -0.66654400 |
| H                                                 | -7.13037000 | -3.09990300 | 0.61358800  | H           | -0.94393700 | 2.44742900  | -2.76044300 | C          | 6.18002700 | -1.69417000 | -0.48875000 |
| H                                                 | -7.74970700 | -1.85545100 | -1.44340200 | H           | -2.54623600 | 5.38132100  | -2.55065400 | C          | 6.26179600 | -0.29951600 | -0.56382100 |
| H                                                 | -6.00133500 | -0.65915300 | -2.73505300 | C           | 0.02551600  | 0.00878900  | 1.76113900  | C          | 5.08012500 | 0.40938900  | -0.82797000 |
| H                                                 | -3.66059300 | -0.66796800 | -1.95681100 | C           | 0.35980000  | -1.34327700 | -0.36895800 | C          | 3.87033300 | -0.24746300 | -1.00901700 |
| C                                                 | -2.64512200 | -2.01864500 | 0.22591500  | C           | -0.15881600 | -0.08982300 | 3.14157900  | H          | 4.92927900 | -3.44098100 | -0.60094600 |
| O                                                 | -2.14675300 | -3.13942900 | 0.36641700  | C           | 0.31895300  | 0.90109600  | 3.99382300  | H          | 2.97039400 | 0.32395200  | -1.21741600 |
| N                                                 | -1.92181700 | -0.88929300 | 0.48095200  | C           | 0.99523600  | 2.00126100  | 3.47236600  | H          | 5.11441200 | 1.49237400  | -0.89588300 |
| C                                                 | -2.48432600 | 0.43184100  | 0.42726000  | C           | 1.19009700  | 2.10311300  | 2.09737500  | H          | 7.07741600 | -2.27044700 | -0.28551000 |
| C                                                 | -0.51798100 | -1.09565400 | 0.87229400  | C           | 0.70684400  | 1.11267200  | 1.24712400  | H          | 2.64370300 | -3.43915300 | -1.12408900 |
| C                                                 | -3.37389000 | 0.84495300  | 1.41456800  | H           | 1.37302300  | 2.77335100  | 4.13479000  | H          | 2.04440300 | -2.08919800 | -2.09227300 |
| C                                                 | -3.91803300 | 2.12451600  | 1.35888800  | H           | 0.16807200  | 0.81002200  | 5.06458200  | O          | 8.74294200 | -0.30281700 | -0.12250000 |

|   |                                                 |             |             |   |                                                       |             |             |   |                                                                                              |             |             |
|---|-------------------------------------------------|-------------|-------------|---|-------------------------------------------------------|-------------|-------------|---|----------------------------------------------------------------------------------------------|-------------|-------------|
| H | 9.56633400                                      | 0.18558800  | -0.00196500 | C | 1.21273500                                            | 0.78538400  | 4.06923900  | O | 1.58846400                                                                                   | 2.99693200  | 1.72042400  |
| B | -2.25557500                                     | 3.59520100  | -1.80528800 | C | 1.16723200                                            | 1.84027000  | 3.16277400  | O | 3.10990000                                                                                   | 2.79024100  | 0.06531100  |
| B | 7.62229100                                      | 0.44620100  | -0.36229300 | C | 0.63002500                                            | 1.64333300  | 1.89326700  | H | -0.57633700                                                                                  | 2.77282300  | 0.30792400  |
| O | 7.62423700                                      | 1.81329100  | -0.43558900 | H | 1.62755400                                            | 0.93506100  | 5.06081300  | H | 0.00713700                                                                                   | 2.93346300  | -1.35798200 |
| H | 8.47591000                                      | 2.24783200  | -0.30735200 | H | 0.75152500                                            | -1.29121600 | 4.39916700  | O | -2.49874300                                                                                  | 1.90092800  | -1.29619100 |
| H | -0.51281300                                     | -2.02298000 | 1.44881700  | H | -0.18445000                                           | -1.63786000 | 2.14022800  | H | -2.61730200                                                                                  | 2.64323300  | -0.68885400 |
| ● | A1(S) (the number of imaginary frequencies = 0) |             |             | H | 1.54337500                                            | 2.81886600  | 3.44291800  | H | -0.99843600                                                                                  | 0.73012000  | -1.92743300 |
| C | -3.63058400                                     | -3.42151700 | 0.53718900  | H | 0.59094400                                            | 2.47346000  | 1.19342400  | O | 1.83645000                                                                                   | 1.15054100  | -1.29410000 |
| H | -2.96236400                                     | -3.78283300 | 1.31162200  | O | 0.07607300                                            | -0.56197500 | -2.09983600 | H | 2.64933700                                                                                   | 1.71565600  | -1.19805400 |
| C | -4.85139000                                     | -4.04840900 | 0.31276400  | N | 1.74572600                                            | -0.68541900 | -0.57020200 | N | -2.53752000                                                                                  | -0.73094500 | -0.10088400 |
| C | -5.69262300                                     | -3.59267900 | -0.70011100 | H | 1.97512700                                            | -0.62983700 | 0.41250000  | H | -2.32751300                                                                                  | -1.54476900 | -0.66915000 |
| C | -5.31079400                                     | -2.50673400 | -1.48445400 | C | 2.73155100                                            | -1.25167400 | -1.47677700 | H | -1.65384300                                                                                  | 0.74696100  | 1.04463400  |
| C | -4.10026300                                     | -1.86370400 | -1.24628400 | C | 4.12859800                                            | -0.77193300 | -1.16149800 | H | -0.23259300                                                                                  | -1.12162200 | 1.28529400  |
| C | -3.25690100                                     | -2.31672700 | -0.23007800 | C | 5.18007500                                            | -1.68284100 | -1.06399300 | C | 1.75555100                                                                                   | -2.14296500 | -0.47248900 |
| H | -5.14293100                                     | -4.89661400 | 0.92338900  | C | 6.47581500                                            | -1.24321000 | -0.80807100 | O | 2.83669000                                                                                   | -1.35914100 | -0.95596600 |
| H | -6.64181200                                     | -4.08644800 | -0.88155800 | C | 6.76059900                                            | 0.11598100  | -0.63381400 | H | 2.55341800                                                                                   | -0.42325100 | -1.02244300 |
| H | -5.95638200                                     | -2.15806300 | -2.28377900 | C | 5.69397000                                            | 1.02133900  | -0.72983600 | H | 1.76599200                                                                                   | -3.06890500 | -1.06242400 |
| H | -3.80910400                                     | -1.01927900 | -1.86057200 | C | 4.39968100                                            | 0.58852400  | -0.99052900 | O | 3.28844600                                                                                   | -3.19884000 | 1.05769500  |
| C | -1.89974300                                     | -1.72585500 | 0.00056900  | H | 4.98376300                                            | -2.74428900 | -1.18695900 | H | 3.92749400                                                                                   | -2.63606000 | 0.59609400  |
| O | -0.91624800                                     | -2.46320700 | 0.09670600  | H | 3.59050700                                            | 1.30965500  | -1.06074100 | O | -0.60611500                                                                                  | -2.54122400 | -0.78324800 |
| N | -1.77058600                                     | -0.36805100 | 0.06802900  | H | 5.88426900                                            | 2.08228100  | -0.59974600 | H | -0.43484900                                                                                  | -3.09814000 | -1.55396300 |
| C | -2.87499700                                     | 0.51796700  | 0.30488800  | H | 7.27965800                                            | -1.96929100 | -0.73588500 | C | 0.37480800                                                                                   | -1.50230900 | -0.72775000 |
| C | -0.42973700                                     | 0.23582200  | 0.10863700  | H | 2.69636800                                            | -2.34590300 | -1.44047600 | H | 0.42596200                                                                                   | -0.99224000 | -1.69602500 |
| C | -3.61457000                                     | 0.41593800  | 1.47952400  | H | 2.44094800                                            | -0.95403100 | -2.48736600 | C | 2.03444300                                                                                   | -2.53052700 | 0.97452100  |
| C | -4.67582600                                     | 1.28867200  | 1.70191300  | O | 9.21095500                                            | -0.33335900 | -0.27045900 | H | 1.27708100                                                                                   | -3.22753000 | 1.34150200  |
| C | -4.97905800                                     | 2.26977900  | 0.76514500  | H | 10.09960000                                           | -0.00605700 | -0.08646200 | H | 2.04167200                                                                                   | -1.63901300 | 1.61090400  |
| C | -4.23344200                                     | 2.40116500  | -0.41572400 | B | -4.60444900                                           | 3.52047400  | -1.45206400 | C | -3.78223000                                                                                  | -0.69567100 | 0.42256200  |
| C | -3.18012900                                     | 1.50647000  | -0.62699800 | B | 8.21687900                                            | 0.60560600  | -0.33852000 | O | -4.60701600                                                                                  | -1.57074700 | 0.12422000  |
| H | -3.36097900                                     | -0.34408500 | 2.21092500  | O | 8.42438300                                            | 1.94741200  | -0.16269100 | C | -4.14039300                                                                                  | 0.41083400  | 1.38503300  |
| H | -5.25793200                                     | 1.20527100  | 2.61373200  | H | 9.33124800                                            | 2.22177800  | 0.01955300  | H | -3.49409800                                                                                  | 0.39252500  | 2.26693200  |
| H | -5.80427800                                     | 2.94996800  | 0.94778400  | H | -0.56056800                                           | 1.24582000  | -0.28857000 | H | -4.04177400                                                                                  | 1.39101000  | 0.91508200  |
| H | -2.58057800                                     | 1.55058600  | -1.53264600 | ● | Sialic acid (the number of imaginary frequencies = 0) |             |             | H | -5.17245100                                                                                  | 0.26740400  | 1.70068700  |
| O | -5.66233700                                     | 4.33456100  | -1.16313600 | C | 1.10217300                                            | 1.54502000  | -0.15105100 | ● | A1(R)-R <sup>2</sup> binding site with sialic acid (the number of imaginary frequencies = 0) |             |             |
| O | -3.94307900                                     | 3.74216000  | -2.62846100 | C | -0.20504200                                           | 2.21724000  | -0.56065800 | C | -2.35569500                                                                                  | 4.22060900  | -2.12919100 |
| H | -3.19813000                                     | 3.16094900  | -2.81602600 | C | -1.27980800                                           | 1.23278500  | -0.99738500 | H | -2.42452000                                                                                  | 4.81110800  | -1.22278900 |
| H | -5.82675900                                     | 4.99649300  | -1.84749700 | C | -1.44885600                                           | 0.19787800  | 0.12165700  | C | -2.10158300                                                                                  | 4.84750300  | -3.34517500 |
| C | 0.13773600                                      | 0.39349700  | 1.50937400  | C | -0.10744200                                           | -0.53055900 | 0.37408800  | C | -2.00656900                                                                                  | 4.09611500  | -4.51423100 |
| C | 0.48567000                                      | -0.41801700 | -0.94782600 | O | 0.89623400                                            | 0.43261000  | 0.70302300  | C | -2.18554600                                                                                  | 2.71524500  | -4.46791700 |
| C | 0.18714300                                      | -0.66127100 | 2.42711000  | C | 2.01501000                                            | 2.54236600  | 0.64549400  | C | -2.46228400                                                                                  | 2.08981600  | -3.25691900 |
| C | 0.72010500                                      | -0.46377200 | 3.69749400  |   |                                                       |             |             |   |                                                                                              |             |             |

|   |             |             |             |   |             |             |             |   |                                                                                              |             |             |
|---|-------------|-------------|-------------|---|-------------|-------------|-------------|---|----------------------------------------------------------------------------------------------|-------------|-------------|
| C | -2.53281200 | 2.83686700  | -2.07982100 | C | -6.48314200 | -3.78116600 | -0.81910700 | C | 3.74236100                                                                                   | -1.47686500 | 1.50392400  |
| H | -1.97616600 | 5.92485700  | -3.37832300 | C | -6.08758100 | -4.44928500 | 0.34817900  | H | 4.24065000                                                                                   | -0.51179200 | 1.65087100  |
| H | -1.79849900 | 4.58619400  | -5.45992100 | C | -5.21982900 | -3.85786900 | 1.25826800  | C | 1.31675500                                                                                   | -2.35727200 | 1.38249400  |
| H | -2.11578100 | 2.12533700  | -5.37600500 | H | -4.71347800 | -0.90125200 | -0.32547800 | H | 1.71692800                                                                                   | -3.35143600 | 1.60602900  |
| H | -2.62033100 | 1.01722100  | -3.21770200 | H | -4.93587700 | -4.39385100 | 2.16032800  | H | 1.22335700                                                                                   | -2.25436800 | 0.29668600  |
| C | -2.91285300 | 2.12523900  | -0.81676700 | H | -6.47178100 | -5.44487300 | 0.54836000  | C | 7.18939200                                                                                   | -3.74186500 | 0.01302800  |
| O | -3.89411600 | 1.37285500  | -0.81085700 | H | -6.25832200 | -1.95242300 | -1.92848800 | O | 7.83318200                                                                                   | -4.36739500 | 0.86725800  |
| N | -2.19407000 | 2.33366400  | 0.32234200  | H | -2.72684700 | -2.36914200 | 1.82183000  | C | 7.42916900                                                                                   | -3.96128900 | -1.46026000 |
| C | -0.89566000 | 2.95713700  | 0.31915100  | H | -4.00114900 | -2.29101200 | 3.03193000  | H | 6.54687900                                                                                   | -4.40423000 | -1.93224700 |
| C | -2.73836100 | 1.66876100  | 1.52123300  | O | -7.83570200 | -3.71935100 | -2.94200000 | H | 7.64784800                                                                                   | -3.01911000 | -1.96533700 |
| C | -0.71658000 | 4.18643800  | 0.95049300  | H | -8.44088700 | -4.15093600 | -3.55669600 | H | 8.26806000                                                                                   | -4.64638400 | -1.57251300 |
| C | 0.54189700  | 4.77365900  | 0.94631200  | B | 2.67803900  | 2.20609900  | -1.12132100 | O | -7.90293700                                                                                  | -5.71579500 | -1.58478000 |
| C | 1.60535900  | 4.14258000  | 0.30037900  | B | -7.46405400 | -4.44354900 | -1.84050200 | H | -8.50277200                                                                                  | -6.10286300 | -2.23375400 |
| C | 1.44727500  | 2.91563900  | -0.35382100 | C | 3.55889000  | 0.02055700  | -1.32777200 | H | -3.79694100                                                                                  | 1.93497100  | 1.56196600  |
| C | 0.17269000  | 2.33462500  | -0.31720000 | C | 5.03673500  | 0.04147900  | -1.72334100 | ● | A1(S)-R <sup>2</sup> binding site with sialic acid (the number of imaginary frequencies = 0) |             |             |
| H | -1.55579500 | 4.67279200  | 1.43579800  | C | 5.93419900  | -0.62611500 | -0.68923800 | C | -3.70585300                                                                                  | 4.16487000  | -0.99559300 |
| H | 0.69182900  | 5.72928000  | 1.43953400  | C | 5.40225100  | -2.03978800 | -0.45988000 | H | -4.53384200                                                                                  | 3.92919100  | -0.33538500 |
| H | 2.58094200  | 4.62113500  | 0.30527500  | C | 3.94668000  | -1.97849600 | 0.05662500  | C | -3.71741700                                                                                  | 5.33493700  | -1.74713900 |
| H | -0.00062800 | 1.37503400  | -0.79380300 | O | 3.13974000  | -1.24880200 | -0.87139500 | C | -2.66200500                                                                                  | 5.61794700  | -2.61164500 |
| O | 3.76917300  | 3.09118300  | -1.45776700 | C | 2.67570200  | 0.34767400  | -2.55439100 | C | -1.59483000                                                                                  | 4.72930700  | -2.71855200 |
| H | 3.45883300  | 3.92524300  | -1.82515400 | O | 2.52287900  | -0.38808800 | -3.51463200 | C | -1.57028700                                                                                  | 3.56953800  | -1.95000400 |
| C | -2.09542300 | 2.09737800  | 2.82748600  | O | 2.14710400  | 1.52912700  | -2.40858800 | C | -2.62509800                                                                                  | 3.28506000  | -1.08106800 |
| C | -2.65709300 | 0.13999900  | 1.37854100  | H | 5.15650500  | -0.49961200 | -2.66744300 | H | -4.55324400                                                                                  | 6.02183600  | -1.66360500 |
| C | -2.80042300 | 2.94954300  | 3.67797000  | H | 5.32540700  | 1.08289000  | -1.88221300 | H | -2.67386600                                                                                  | 6.52647100  | -3.20510000 |
| C | -2.25437000 | 3.34868700  | 4.89545600  | O | 7.26672700  | -0.73429200 | -1.17416900 | H | -0.77769500                                                                                  | 4.93852700  | -3.40110600 |
| C | -0.99593400 | 2.89100500  | 5.27471600  | H | 7.64865900  | 0.14987900  | -1.24319300 | H | -0.73614500                                                                                  | 2.88315300  | -2.03744200 |
| C | -0.29016900 | 2.03444100  | 4.43156300  | H | 5.93499400  | -0.06500200 | 0.25306700  | C | -2.69875900                                                                                  | 2.00536800  | -0.30440600 |
| C | -0.83375100 | 1.63670000  | 3.21410400  | O | 3.23953000  | 1.02105500  | -0.40191400 | O | -3.72424300                                                                                  | 1.31764500  | -0.35188900 |
| H | -0.56712900 | 3.19825000  | 6.22330300  | N | 6.23987200  | -2.85835900 | 0.39313300  | N | -1.62162500                                                                                  | 1.61375500  | 0.42643800  |
| H | -2.81388500 | 4.01349200  | 5.54564100  | H | 6.05813400  | -2.80998800 | 1.39043000  | C | -0.51881100                                                                                  | 2.47552300  | 0.76600000  |
| H | -3.78331400 | 3.30791600  | 3.38553000  | H | 5.34384000  | -2.52029300 | -1.44010300 | C | -1.62607600                                                                                  | 0.31325200  | 1.11661400  |
| H | 0.69195800  | 1.67427300  | 4.72148500  | H | 3.55269400  | -2.99738100 | 0.01783800  | C | -0.69993800                                                                                  | 3.52623400  | 1.66089500  |
| H | -0.26155400 | 0.98165900  | 2.56378500  | C | 2.26822500  | -1.29611300 | 1.93041300  | C | 0.40467900                                                                                   | 4.28065700  | 2.04351000  |
| O | -1.71397300 | -0.40928500 | 0.80291700  | O | 1.78815500  | 0.00954900  | 1.67530400  | C | 1.67140700                                                                                   | 3.96511300  | 1.55449900  |
| N | -3.64855600 | -0.53563100 | 1.98233800  | H | 2.20400600  | 0.37115500  | 0.86360100  | C | 1.87472100                                                                                   | 2.91484500  | 0.65012700  |
| H | -4.41505500 | -0.01079500 | 2.38048200  | H | 2.26241400  | -1.40481400 | 3.02304900  | C | 0.74469200                                                                                   | 2.18944500  | 0.26169400  |
| C | -3.73004700 | -1.98395100 | 2.01842000  | O | 0.04046000  | -2.27992700 | 1.99808800  | H | -1.68743200                                                                                  | 3.73859400  | 2.05727100  |
| C | -4.70968100 | -2.57823500 | 1.02578400  | H | -0.46763800 | -1.55614600 | 1.58738600  | H | 0.27863700                                                                                   | 5.10303500  | 2.74100700  |
| C | -5.09361500 | -1.89960200 | -0.13105200 | O | 4.35452300  | -2.46654600 | 2.33741300  | H | 2.52083500                                                                                   | 4.54912600  | 1.89770400  |
| C | -5.96869400 | -2.49680900 | -1.03461600 | H | 4.36650000  | -2.14760300 | 3.24931600  |   |                                                                                              |             |             |

|   |              |             |             |   |                                                                                              |             |             |   |             |             |             |
|---|--------------|-------------|-------------|---|----------------------------------------------------------------------------------------------|-------------|-------------|---|-------------|-------------|-------------|
| H | 0.83961100   | 1.36636200  | -0.43972700 | C | 4.53588500                                                                                   | -1.77003600 | -0.62644300 | C | 8.78763500  | 0.73290900  | 4.22002800  |
| O | 4.42157600   | 3.34519300  | 0.57168000  | O | 4.01076200                                                                                   | -0.61813400 | -1.29333500 | C | 9.56523100  | 1.74001100  | 3.65219700  |
| H | 4.25388400   | 4.28842100  | 0.47629000  | C | 3.95322500                                                                                   | 1.63978200  | -2.00574800 | C | 9.20224600  | 2.28942200  | 2.42469300  |
| C | -2.21360100  | 0.36541900  | 2.51662000  | O | 4.18964500                                                                                   | 1.48832700  | -3.19223200 | C | 8.07609500  | 1.82151500  | 1.75509700  |
| C | -2.14396000  | -0.80294300 | 0.19395300  | O | 3.30301800                                                                                   | 2.63960700  | -1.48023100 | C | 7.29701500  | 0.81022300  | 2.32044100  |
| C | -3.46375700  | 0.93078900  | 2.78967400  | H | 6.41358500                                                                                   | 0.76210900  | -1.65571800 | H | 9.06430800  | 0.30513400  | 5.17805600  |
| C | -3.95746000  | 0.95248700  | 4.09068300  | H | 6.12463200                                                                                   | 1.74309000  | -0.20432200 | H | 10.44955700 | 2.10000500  | 4.16802600  |
| C | -3.21278500  | 0.40983100  | 5.13598200  | O | 7.89974300                                                                                   | -0.31779700 | 0.18881300  | H | 9.79689200  | 3.08398900  | 1.98608300  |
| C | -1.96794600  | -0.15426500 | 4.87345300  | H | 8.17087500                                                                                   | 0.46000200  | 0.69284300  | H | 7.79902900  | 2.25270200  | 0.79983400  |
| C | -1.47317000  | -0.17281000 | 3.57178000  | H | 6.08472600                                                                                   | -0.34694500 | 1.17147300  | C | 6.01996900  | 0.34430000  | 1.69030300  |
| H | -3.60076600  | 0.42906000  | 6.14932300  | O | 3.68375700                                                                                   | 1.09758200  | 0.23861900  | O | 4.99604900  | 0.25491000  | 2.37183600  |
| H | -4.92896800  | 1.39456900  | 4.28764300  | N | 6.66125800                                                                                   | -2.86035000 | 0.03864900  | N | 6.00557800  | 0.06100600  | 0.35478700  |
| H | -4.05197100  | 1.34564100  | 1.97936000  | H | 6.15254000                                                                                   | -3.28990700 | 0.80439200  | C | 7.19371000  | -0.20563000 | -0.40690400 |
| H | -1.37711300  | -0.57480300 | 5.68077700  | H | 6.41787400                                                                                   | -1.59691000 | -1.57927400 | C | 4.72602600  | -0.20138500 | -0.32184200 |
| H | -0.49727300  | -0.60692400 | 3.37340700  | H | 4.31157200                                                                                   | -2.60137700 | -1.29922100 | C | 8.02973300  | -1.26041100 | -0.04884800 |
| O | -1.64580700  | -0.93474100 | -0.93159200 | C | 2.23649300                                                                                   | -2.03916900 | 0.54989400  | C | 9.17397100  | -1.51825700 | -0.79831800 |
| N | -3.01944800  | -1.67094000 | 0.71600900  | O | 1.67323400                                                                                   | -0.74882400 | 0.71441500  | C | 9.46676700  | -0.73958500 | -1.91275600 |
| H | -3.39871500  | -1.47015200 | 1.63119800  | H | 2.33373900                                                                                   | -0.06150700 | 0.48581700  | C | 8.62496000  | 0.31212900  | -2.29907500 |
| C | -3.50462400  | -2.84520400 | 0.01360400  | H | 1.86271500                                                                                   | -2.64270200 | 1.38783600  | C | 7.48724300  | 0.56644100  | -1.52715600 |
| C | -4.97281600  | -2.77536800 | -0.35051800 | O | 0.33419200                                                                                   | -2.96728800 | -0.66492800 | H | 7.78551000  | -1.87183900 | 0.81342500  |
| C | -5.59272800  | -1.56237900 | -0.65635100 | H | -0.17200000                                                                                  | -2.14396400 | -0.78460900 | H | 9.82889500  | -2.33540500 | -0.51411000 |
| C | -6.93330900  | -1.53727700 | -1.02890700 | O | 4.20128800                                                                                   | -3.33010000 | 1.13092300  | H | 10.35752700 | -0.94930600 | -2.49606200 |
| C | -7.69484400  | -2.71050600 | -1.11014200 | H | 3.85426400                                                                                   | -3.49269700 | 2.01787000  | H | 6.82853600  | 1.38652700  | -1.79677000 |
| C | -7.05802100  | -3.91898800 | -0.79812300 | C | 3.77500000                                                                                   | -2.03826700 | 0.69050700  | C | 4.30273100  | -1.66060400 | -0.30230600 |
| C | -5.72032200  | -3.95246300 | -0.42023000 | H | 4.03593000                                                                                   | -1.28572200 | 1.44336800  | C | 3.66729600  | 0.83644200  | 0.10602700  |
| H | -5.02649000  | -0.63790400 | -0.59656300 | C | 1.72655000                                                                                   | -2.70086700 | -0.72707600 | C | 4.26023300  | -2.41700600 | 0.87366500  |
| H | -5.25222000  | -4.90207300 | -0.17447600 | H | 2.22039200                                                                                   | -3.66906300 | -0.85437900 | C | 3.86142800  | -3.74991100 | 0.83889500  |
| H | -7.62155100  | -4.84583700 | -0.84541200 | H | 1.95972200                                                                                   | -2.07110700 | -1.59222900 | C | 3.49800000  | -4.34597500 | -0.36692600 |
| H | -7.40020500  | -0.58503500 | -1.26256000 | C | 7.78554200                                                                                   | -3.50085600 | -0.35182400 | C | 3.53800400  | -3.60116200 | -1.54175700 |
| H | -2.89861000  | -2.94304500 | -0.88996700 | O | 8.17494600                                                                                   | -4.50313900 | 0.26388900  | C | 3.94104700  | -2.26863000 | -1.50695300 |
| H | -3.31897500  | -3.72932500 | 0.62987500  | C | 8.53516000                                                                                   | -2.98436200 | -1.55505400 | H | 3.18739200  | -5.38555600 | -0.38976600 |
| O | -9.76543700  | -1.45817300 | -1.81035400 | H | 7.92191700                                                                                   | -3.06642100 | -2.45750000 | H | 3.83318600  | -4.32436200 | 1.75935300  |
| H | -10.69539600 | -1.46589300 | -2.06700000 | H | 8.80787500                                                                                   | -1.93592200 | -1.42371600 | H | 4.53102600  | -1.95578500 | 1.81605500  |
| B | 3.33281100   | 2.54041300  | 0.06818600  | H | 9.43234000                                                                                   | -3.58764700 | -1.68440200 | H | 3.26182400  | -4.05609100 | -2.48749000 |
| B | -9.20084200  | -2.67378300 | -1.52828200 | O | -9.88307300                                                                                  | -3.85978000 | -1.59260500 | H | 3.97656300  | -1.69549600 | -2.42924700 |
| H | -0.56929600  | 0.04426900  | 1.21816300  | H | -10.81018600                                                                                 | -3.80737000 | -1.85384400 | O | 3.95216800  | 2.03519300  | 0.10636800  |
| C | 4.40844100   | 0.67412600  | -0.88608700 | ● | Al(S)-R <sup>+</sup> binding site with sialic acid (the number of imaginary frequencies = 0) |             |             | N | 2.43068200  | 0.37871300  | 0.34417600  |
| C | 5.92036600   | 0.78104800  | -0.67840100 | C | 7.64882200                                                                                   | 0.27992000  | 3.56298700  | H | 2.28187800  | -0.61808600 | 0.41332600  |
| C | 6.47925600   | -0.36942200 | 0.14821000  | H | 7.02822800                                                                                   | -0.49055800 | 4.00799100  | C | 1.32995900  | 1.27103600  | 0.69613000  |
| C | 6.07605300   | -1.66982800 | -0.54349600 |   |                                                                                              |             |             | C | 0.00807500  | 0.54990400  | 0.61680100  |

|   |             |             |             |                                                                                                                        |              |             |             |   |             |             |             |
|---|-------------|-------------|-------------|------------------------------------------------------------------------------------------------------------------------|--------------|-------------|-------------|---|-------------|-------------|-------------|
| C | -0.68377700 | 0.19454100  | 1.77372800  | H                                                                                                                      | -5.55365400  | 3.54434500  | 0.36262100  | C | 5.18894300  | 2.20890200  | -0.16844100 |
| C | -1.89971600 | -0.48274500 | 1.69242900  | O                                                                                                                      | -4.66622800  | 3.83890600  | -2.07840700 | H | 4.41372200  | 4.91863600  | 1.72486500  |
| C | -2.47342700 | -0.82807700 | 0.46281000  | H                                                                                                                      | -3.88636700  | 3.32991000  | -1.81118000 | H | 6.74045400  | 4.52468000  | 2.49918500  |
| C | -1.76194700 | -0.46404400 | -0.68941500 | O                                                                                                                      | -7.86410700  | 2.81497100  | 0.69354400  | H | 8.06231100  | 2.67151000  | 1.54838400  |
| C | -0.54734200 | 0.21082900  | -0.61979400 | H                                                                                                                      | -7.54995200  | 3.36298300  | 1.42463700  | H | 4.72137500  | 1.56594700  | -0.90725300 |
| H | -0.26905600 | 0.44953900  | 2.74569100  | C                                                                                                                      | -6.84995400  | 1.86731600  | 0.34799200  | O | 8.81862100  | 0.93287500  | -0.25115600 |
| H | -0.02357300 | 0.48015200  | -1.53381700 | H                                                                                                                      | -6.50399700  | 1.34982100  | 1.24898500  | H | 9.11007700  | 1.82992800  | -0.44428700 |
| H | -2.16997100 | -0.71330400 | -1.66489000 | C                                                                                                                      | -5.79620300  | 3.06470000  | -1.69131300 | C | 2.22377900  | 2.96582700  | 2.22524900  |
| H | -2.41361700 | -0.74681500 | 2.61339400  | H                                                                                                                      | -6.67660400  | 3.69999200  | -1.81592900 | C | 1.28683000  | 1.79763100  | 0.22403900  |
| H | 1.48439900  | 1.66899600  | 1.70487300  | H                                                                                                                      | -5.88989600  | 2.18855000  | -2.34225000 | C | 1.80554700  | 3.97888100  | 3.08857400  |
| H | 1.35555100  | 2.11913500  | 0.00664300  | C                                                                                                                      | -11.09109200 | 0.67173400  | 0.29636600  | C | 2.03805300  | 3.88523500  | 4.45867800  |
| O | -4.08771400 | -2.57696400 | 1.43420600  | O                                                                                                                      | -11.89209200 | 1.46649800  | 0.80812800  | C | 2.68821100  | 2.76938200  | 4.97738900  |
| H | -3.27216200 | -3.04573100 | 1.63805400  | C                                                                                                                      | -11.57105800 | -0.50542200 | -0.51620900 | C | 3.10219800  | 1.75139900  | 4.12001500  |
| B | 8.94891400  | 1.19129300  | -3.55527000 | H                                                                                                                      | -11.25864000 | -0.40750700 | -1.56028800 | C | 2.87234200  | 1.84469700  | 2.75093400  |
| B | -3.89473100 | -1.58433400 | 0.40326700  | H                                                                                                                      | -11.16499200 | -1.44020500 | -0.12607000 | H | 2.86964100  | 2.69115100  | 6.04465700  |
| H | 4.90021500  | 0.05862300  | -1.36926600 | H                                                                                                                      | -12.65893500 | -0.52843900 | -0.47596400 | H | 1.70812100  | 4.68192600  | 5.11763700  |
| O | 10.09324500 | 0.91856500  | -4.25224800 | H                                                                                                                      | 10.26997900  | 1.47480100  | -5.02064300 | H | 1.29632600  | 4.85065700  | 2.68759000  |
| O | 8.06835500  | 2.18368300  | -3.88662300 | H                                                                                                                      | 8.28650000   | 2.70989500  | -4.66538300 | H | 3.60939500  | 0.87837900  | 4.51872600  |
| C | -6.04535400 | -1.07781000 | -0.46449900 | ● A1(R)-R <sup>2</sup> and R <sup>4</sup> binding sites with sialic acids<br>(the number of imaginary frequencies = 0) |              |             |             | H | 3.21631000  | 1.04806300  | 2.09750200  |
| C | -7.15197700 | -1.87706300 | 0.22728400  | C                                                                                                                      | 4.71939300   | 5.39204500  | -1.89336500 | O | 1.95601100  | 0.89377400  | -0.28835500 |
| C | -8.15969500 | -0.99068400 | 0.94939500  | H                                                                                                                      | 4.65842300   | 5.81606300  | -0.89764200 | N | -0.03300300 | 1.69804100  | 0.42406600  |
| C | -8.68878700 | 0.02719300  | -0.05961400 | H                                                                                                                      | 5.64142400   | 5.89757100  | -2.80475900 | H | -0.53107100 | 2.47404000  | 0.83758000  |
| C | -7.52136900 | 0.86988800  | -0.62200100 | C                                                                                                                      | 5.73021100   | 5.35567500  | -4.08486900 | C | -0.80097300 | 0.50780600  | 0.05485800  |
| O | -6.55651600 | 0.00127000  | -1.22170900 | C                                                                                                                      | 4.88013900   | 4.31721700  | -4.45907100 | C | -2.27789400 | 0.76670900  | 0.20751500  |
| C | -5.27957400 | -1.98458100 | -1.45408600 | C                                                                                                                      | 3.94255400   | 3.82608500  | -3.55675600 | C | -2.99049000 | 1.43577500  | -0.78998700 |
| O | -5.73998600 | -2.42021600 | -2.49568800 | C                                                                                                                      | 3.86818700   | 4.35003700  | -2.26498200 | C | -4.34629500 | 1.70609100  | -0.62890300 |
| O | -4.08805100 | -2.22895500 | -0.98755700 | H                                                                                                                      | 6.29222100   | 6.71541100  | -2.51294400 | C | -5.04841100 | 1.31616600  | 0.52080900  |
| H | -7.69530400 | -2.45178600 | -0.52961400 | H                                                                                                                      | 6.45683300   | 5.74502200  | -4.79072500 | C | -4.31828400 | 0.64197100  | 1.50702200  |
| H | -6.67884100 | -2.57797900 | 0.91910000  | H                                                                                                                      | 4.94284100   | 3.89334000  | -5.45601700 | C | -2.95903800 | 0.37253600  | 1.35943100  |
| O | -9.26287800 | -1.75841400 | 1.41415500  | H                                                                                                                      | 3.26633100   | 3.02957400  | -3.84893500 | H | -2.47896500 | 1.74602300  | -1.69784100 |
| H | -8.96725500 | -2.33098400 | 2.13329300  | H                                                                                                                      | 2.78622100   | 3.84201000  | -1.35990800 | H | -2.42165900 | -0.15054400 | 2.14653500  |
| H | -7.69425400 | -0.47381300 | 1.79722800  | O                                                                                                                      | 1.62221500   | 3.78614800  | -1.77176400 | H | -4.82224000 | 0.32207200  | 2.41455400  |
| O | -5.06226600 | -0.64200500 | 0.42981300  | O                                                                                                                      | 3.08950500   | 3.47386600  | -0.08287300 | H | -4.87301800 | 2.23192600  | -1.42139300 |
| N | -9.76108500 | 0.86024000  | 0.44472400  | N                                                                                                                      | 4.44182600   | 3.25493700  | 0.36228200  | H | -0.55558200 | 0.25094900  | -0.97971700 |
| H | -9.48644200 | 1.70319300  | 0.93812300  | C                                                                                                                      | 1.92757000   | 3.09581000  | 0.74214400  | H | -0.49044000 | -0.33317300 | 0.68218900  |
| H | -9.07209600 | -0.53944900 | -0.91219900 | C                                                                                                                      | 4.99806200   | 4.09847600  | 1.32204400  | O | -7.01247300 | 2.93593500  | 0.18009800  |
| H | -7.92371700 | 1.45248800  | -1.45466900 | C                                                                                                                      | 6.30060200   | 3.87513200  | 1.74845000  | H | -6.33668400 | 3.59978300  | 0.35022100  |
| C | -5.64369900 | 2.62957500  | -0.23843200 | C                                                                                                                      | 7.04324200   | 2.82682200  | 1.20459400  | B | 7.39074900  | 0.78054100  | -0.40921100 |
| O | -4.41139700 | 1.94238700  | -0.09220400 | C                                                                                                                      | 6.51238400   | 1.97540400  | 0.22904500  | B | -6.62151400 | 1.63270900  | 0.66516500  |
| H | -4.57081100 | 0.97828000  | 0.01169900  |                                                                                                                        |              |             |             | C | 7.06063600  | -1.49079600 | -0.98188500 |

|   |              |             |             |   |                                                                                                                      |             |             |   |             |            |             |
|---|--------------|-------------|-------------|---|----------------------------------------------------------------------------------------------------------------------|-------------|-------------|---|-------------|------------|-------------|
| C | 8.37978500   | -2.26435500 | -1.01741300 | C | -10.84915300                                                                                                         | -0.92819600 | -0.49767000 | C | 4.18240200  | 7.20516100 | -2.28822600 |
| C | 8.41867600   | -3.40200500 | -0.00532500 | C | -9.54140300                                                                                                          | -1.68816800 | -0.17890600 | C | 5.29245600  | 6.75145500 | -2.99764400 |
| C | 7.20551200   | -4.29368700 | -0.26497600 | O | -8.86799200                                                                                                          | -1.03962400 | 0.90295500  | C | 5.59462000  | 5.39192700 | -3.01861800 |
| C | 5.90357700   | -3.47607300 | -0.10284800 | C | -8.16606300                                                                                                          | 0.79776800  | 2.22749100  | C | 4.80234400  | 4.48818900 | -2.31727700 |
| O | 5.93596500   | -2.34557600 | -0.97820100 | O | -8.78294900                                                                                                          | 0.57269200  | 3.25475100  | C | 3.69125200  | 4.94053400 | -1.60343300 |
| C | 6.92521400   | -0.60736700 | -2.24384400 | O | -7.05483000                                                                                                          | 1.47173800  | 2.13912300  | H | 3.94028800  | 8.26279600 | -2.27223000 |
| O | 6.75008200   | -1.03287000 | -3.37310400 | H | -10.56191900                                                                                                         | 1.16030900  | 1.20224900  | H | 5.91756100  | 7.45533900 | -3.53762300 |
| O | 7.04961600   | 0.64658900  | -1.91355900 | H | -9.52577700                                                                                                          | 2.16699000  | 0.17200200  | H | 6.44983800  | 5.03240000 | -3.58142600 |
| H | 8.50824100   | -2.69797300 | -2.01441300 | O | -11.76815900                                                                                                         | 1.19150100  | -1.09425700 | H | 5.04405400  | 3.43178700 | -2.33639100 |
| H | 9.18987300   | -1.55300200 | -0.84229100 | H | -11.58356200                                                                                                         | 2.08507800  | -1.41031400 | C | 2.74857100  | 4.00042900 | -0.91429500 |
| O | 9.58757000   | -4.19325600 | -0.18002100 | H | -9.89870800                                                                                                          | 0.58406200  | -1.72238000 | O | 1.53454700  | 4.08322500 | -1.12674400 |
| H | 10.36060700  | -3.67187400 | 0.07102500  | O | -7.49585900                                                                                                          | 0.60321400  | 0.01115500  | N | 3.25572500  | 3.05322300 | -0.08059500 |
| H | 8.39047200   | -3.01653800 | 1.02103300  | N | -11.63923500                                                                                                         | -1.61252600 | -1.50056800 | C | 4.59522100  | 3.07581500 | 0.44688400  |
| O | 7.00566800   | -0.57939000 | 0.07923900  | H | -11.12821700                                                                                                         | -2.05013900 | -2.26010100 | C | 2.36969400  | 2.04204100 | 0.52067400  |
| N | 7.17983500   | -5.50530500 | 0.52895000  | H | -11.41616100                                                                                                         | -0.92583700 | 0.43685100  | C | 4.97247900  | 4.05525900 | 1.36134100  |
| H | 6.73261300   | -5.44371800 | 1.43787100  | H | -9.83080400                                                                                                          | -2.66335500 | 0.22121700  | C | 6.24272000  | 3.99454300 | 1.92561200  |
| H | 7.24069100   | -4.57935800 | -1.31965300 | C | -7.25278400                                                                                                          | -2.63387800 | -0.97975500 | C | 7.10567700  | 2.95038500 | 1.59660100  |
| H | 5.08988400   | -4.09592000 | -0.48802700 | O | -6.23548300                                                                                                          | -1.72329000 | -0.59545900 | C | 6.74708900  | 1.95650300 | 0.67689500  |
| C | 4.27842500   | -2.13989800 | 1.43394000  | H | -6.63377100                                                                                                          | -0.88398300 | -0.27468900 | C | 5.47641900  | 2.05690100 | 0.10300200  |
| O | 4.62964700   | -0.76992000 | 1.40779700  | H | -6.89511300                                                                                                          | -3.11513000 | -1.89987300 | H | 4.27693000  | 4.84282200 | 1.63227000  |
| H | 5.42187600   | -0.63541800 | 0.84535200  | O | -6.09555000                                                                                                          | -4.33945000 | 0.26746900  | H | 6.55051900  | 4.75195800 | 2.63996800  |
| H | 3.85428200   | -2.31826200 | 2.43105700  | H | -5.46170500                                                                                                          | -3.61693500 | 0.38966100  | H | 8.07790100  | 2.90845700 | 2.07977900  |
| O | 1.98106100   | -1.73994000 | 0.72722900  | O | -9.29679500                                                                                                          | -2.80783200 | -2.25493300 | H | 5.14511100  | 1.31772300 | -0.61975000 |
| H | 2.06427000   | -0.82351800 | 0.40170800  | H | -8.80728000                                                                                                          | -2.88019200 | -3.08472900 | O | 9.00607000  | 0.73580100 | 0.96713100  |
| O | 5.22869400   | -4.29555400 | 2.01476600  | C | -8.58194400                                                                                                          | -1.95012700 | -1.36099500 | H | 9.46335400  | 1.57990800 | 0.89426100  |
| H | 5.09147600   | -4.11152000 | 2.95324000  | H | -8.33328500                                                                                                          | -1.01139600 | -1.86736800 | C | 1.74969000  | 2.47420100 | 1.83821500  |
| C | 5.51038300   | -3.06787600 | 1.33485600  | C | -7.36540800                                                                                                          | -3.72466900 | 0.07910000  | C | 1.40934000  | 1.45778600 | -0.52753000 |
| H | 6.34247400   | -2.55468600 | 1.83020200  | H | -8.05531000                                                                                                          | -4.50858400 | -0.24297400 | C | 1.08226900  | 3.69344100 | 1.99498500  |
| C | 3.17166300   | -2.45082900 | 0.42906500  | H | -7.71943100                                                                                                          | -3.30019200 | 1.02492300  | C | 0.52717400  | 4.03932000 | 3.22363000  |
| H | 2.92659100   | -3.51665700 | 0.48098400  | C | -12.97975200                                                                                                         | -1.78377200 | -1.51757800 | C | 0.62918900  | 3.17443500 | 4.31132000  |
| H | 3.51058400   | -2.21974800 | -0.58594100 | O | -13.51764700                                                                                                         | -2.38338300 | -2.45901700 | C | 1.29272800  | 1.95982100 | 4.16450300  |
| C | 7.61700600   | -6.73359200 | 0.17331300  | C | -13.79381000                                                                                                         | -1.25112300 | -0.36425500 | C | 1.85020700  | 1.61578300 | 2.93565800  |
| O | 7.53614400   | -7.67702000 | 0.97270300  | H | -13.53693100                                                                                                         | -1.77257200 | 0.56284300  | H | 0.19544100  | 3.44767000 | 5.26788600  |
| C | 8.17942400   | -6.93074000 | -1.21275400 | H | -13.61116800                                                                                                         | -0.18547900 | -0.21666700 | H | 0.01194900  | 4.98864800 | 3.33053200  |
| H | 7.40557600   | -6.76752600 | -1.96906500 | H | -14.84734800                                                                                                         | -1.42003500 | -0.58136000 | H | 0.99190100  | 4.36670700 | 1.15036900  |
| H | 8.99569700   | -6.23287800 | -1.40592500 | H | 1.19097300                                                                                                           | 3.89162000  | 0.61214800  | H | 1.38287200  | 1.28095000 | 5.00639900  |
| H | 8.53940500   | -7.95517800 | -1.29461600 | ● | Al(S)-R <sup>2</sup> and R <sup>4</sup> binding sites with sialic acids<br>(the number of imaginary frequencies = 0) |             |             | H | 2.37417500  | 0.67024400 | 2.82807500  |
| C | -8.61014900  | 0.34764100  | 0.81750800  | C | 3.37619500                                                                                                           | 6.30066000  | -1.60563000 | O | 1.86855500  | 0.99509200 | -1.58200200 |
| C | -9.84203900  | 1.14169200  | 0.37773200  | H | 2.49984000                                                                                                           | 6.64572900  | -1.06719900 | N | 0.12077900  | 1.34705000 | -0.19907800 |
| C | -10.53715700 | 0.52957000  | -0.83238800 |   |                                                                                                                      |             |             | H | -0.21029500 | 1.79410100 | 0.64452700  |



|   |             |             |             |   |              |             |             |   |              |             |             |
|---|-------------|-------------|-------------|---|--------------|-------------|-------------|---|--------------|-------------|-------------|
| C | -0.86012800 | 0.74352800  | -1.10071000 | H | 3.23112400   | -2.38402800 | 1.14162200  | H | -5.62414200  | -2.86145300 | -2.60096000 |
| C | -2.21465500 | 0.67905700  | -0.44300200 | O | 2.13021000   | -1.80836800 | -1.12140500 | O | -9.86123800  | -0.78961200 | -2.96038100 |
| C | -3.08607500 | 1.76841100  | -0.49950100 | H | 2.25646300   | -0.85563900 | -1.27939000 | H | -9.57791800  | -0.20868500 | -3.67864300 |
| C | -4.32438500 | 1.71663700  | 0.13498700  | O | 4.66744200   | -4.37022300 | 1.18594100  | C | -8.88895800  | -0.74912500 | -1.91188700 |
| C | -4.74975700 | 0.58009600  | 0.83703500  | H | 4.16773300   | -4.24050300 | 2.00258100  | H | -8.67363900  | 0.29140400  | -1.64645500 |
| C | -3.86319900 | -0.50330800 | 0.88031700  | C | 5.18695000   | -3.11163900 | 0.74988200  | C | -7.55079700  | -2.89709900 | -2.45928700 |
| C | -2.61802100 | -0.45847300 | 0.25743800  | H | 5.74487700   | -2.63850300 | 1.56601100  | H | -8.36616800  | -3.28887400 | -3.07237700 |
| H | -2.79325100 | 2.66151800  | -1.04616800 | C | 3.38538400   | -2.45302500 | -0.97217700 | H | -7.64093500  | -3.29621400 | -1.44314400 |
| H | -1.95336800 | -1.31709300 | 0.31140400  | H | 3.19516300   | -3.52597400 | -1.07262200 | C | -13.17395900 | -0.94078900 | -0.92920700 |
| H | -4.15274800 | -1.40427300 | 1.41361500  | H | 4.07398900   | -2.14286000 | -1.76527000 | O | -13.95823500 | -0.74610600 | -1.86847100 |
| H | -4.97967000 | 2.58213800  | 0.07509100  | C | 7.55130300   | -6.77457800 | 0.20683800  | C | -13.66175800 | -1.46474400 | 0.39895000  |
| H | -0.90608600 | 1.33323500  | -2.02228600 | O | 7.15166500   | -7.77486500 | 0.81918400  | H | -13.25745500 | -2.46315700 | 0.59162000  |
| H | -0.51146700 | -0.25672300 | -1.37028300 | C | 8.61607700   | -6.88349800 | -0.85675700 | H | -13.35319700 | -0.80947900 | 1.21510500  |
| O | -6.57279300 | 1.76534700  | 2.20596200  | H | 8.20954600   | -6.62104200 | -1.83820500 | H | -14.74830600 | -1.52742400 | 0.36440900  |
| H | -5.81424700 | 2.18494800  | 2.62414900  | H | 9.44997900   | -6.21256400 | -0.64406700 |   |              |             |             |
| B | 7.73336900  | 0.74119000  | 0.28375100  | H | 8.96750900   | -7.91366300 | -0.88682100 |   |              |             |             |
| B | -6.20538700 | 0.54507000  | 1.52592700  | C | -8.21514000  | -0.66829600 | 1.17909200  |   |              |             |             |
| H | 3.01962600  | 1.18673700  | 0.73263700  | C | -9.43693000  | 0.07496900  | 1.72287700  |   |              |             |             |
| C | 7.56210900  | -1.43840500 | -0.59355800 | C | -10.44091500 | 0.43168800  | 0.63339100  |   |              |             |             |
| C | 8.77490000  | -2.26941800 | -0.17050100 | C | -10.80158100 | -0.85648000 | -0.10473500 |   |              |             |             |
| C | 8.38951900  | -3.47828300 | 0.67172700  | C | -9.53092800  | -1.48914900 | -0.71738700 |   |              |             |             |
| C | 7.37526500  | -4.29149300 | -0.12938000 | O | -8.57414100  | -1.73018800 | 0.31763400  |   |              |             |             |
| C | 6.12726300  | -3.43160200 | -0.43272300 | C | -7.41559800  | -1.29705800 | 2.34277500  |   |              |             |             |
| O | 6.51746000  | -2.23453400 | -1.11248000 | O | -7.79453500  | -2.23958600 | 3.01700300  |   |              |             |             |
| C | 7.95586500  | -0.45392600 | -1.72028700 | O | -6.29804800  | -0.64678800 | 2.50363800  |   |              |             |             |
| O | 8.21907100  | -0.77869600 | -2.86566000 | H | -9.94522800  | -0.56658700 | 2.44978200  |   |              |             |             |
| O | 7.98203600  | 0.76047200  | -1.24784300 | H | -9.08421100  | 0.97064900  | 2.23957200  |   |              |             |             |
| H | 9.28390400  | -2.63467300 | -1.06843600 | O | -11.63348700 | 0.95908900  | 1.20097900  |   |              |             |             |
| H | 9.45634800  | -1.61101500 | 0.37208100  | H | -11.44418000 | 1.82679500  | 1.58028400  |   |              |             |             |
| O | 9.52030700  | -4.30592600 | 0.91397100  | H | -10.01820000 | 1.16180900  | -0.06720500 |   |              |             |             |
| H | 10.14023000 | -3.83103100 | 1.48202400  | O | -7.30035100  | 0.19147900  | 0.56255700  |   |              |             |             |
| H | 7.95380300  | -3.16755600 | 1.62920300  | N | -11.85338300 | -0.70179100 | -1.08875600 |   |              |             |             |
| O | 7.10102300  | -0.60457600 | 0.43658800  | H | -11.56498100 | -0.42187300 | -2.02045500 |   |              |             |             |
| N | 7.02044900  | -5.56045200 | 0.47275800  | H | -11.14460100 | -1.56989400 | 0.64911800  |   |              |             |             |
| H | 6.25636800  | -5.55023700 | 1.14035100  | H | -9.81170300  | -2.48464000 | -1.07090800 |   |              |             |             |
| H | 7.83005800  | -4.49492600 | -1.10238800 | C | -7.57771000  | -1.37320900 | -2.43244500 |   |              |             |             |
| H | 5.53739600  | -3.98402100 | -1.16825400 | O | -6.41992500  | -0.90438000 | -1.76058900 |   |              |             |             |
| C | 4.00843600  | -2.17841100 | 0.39354200  | H | -6.65750300  | -0.57270000 | -0.86655100 |   |              |             |             |
| O | 4.33786300  | -0.80715900 | 0.53720600  | H | -7.48238900  | -1.03239900 | -3.47208500 |   |              |             |             |
| H | 5.30471800  | -0.68084200 | 0.43674000  | O | -6.33493000  | -3.34265100 | -3.05026900 |   |              |             |             |
